# Supplementary material for: An integrity assessment of global forest carbon offset projects
Source: Research Square preprint supplement (doi:10.21203/rs.3.rs-5768592/v1), 2025-03-18
Supplement: Supplementary file 1 [file f10fef339327dc7faa84a45b.pdf]

1                                   **Supplementary Information for**  
2                                   **An integrity assessment of**  
3                                   **global forest carbon offset projects**

4                                   Yao An<sup>a,\*</sup>, Sheng Nie<sup>b,\*</sup>, Shize Qin<sup>a</sup>, Thales A. P. West<sup>c</sup>,  
5                                   Andreas Kontoleon<sup>d</sup>, Cheng Wang<sup>b,†</sup>, Da Zhang<sup>a,†</sup>

6  
7   **Affiliations:**

8   <sup>a</sup> Institute of Energy, Environment, and Economy, Tsinghua University, Beijing 100084,  
9   China

10   <sup>b</sup> Key Laboratory of Digital Earth Science, Aerospace Information Research Institute,  
11   Chinese Academy of Sciences, Beijing 100094, China

12   <sup>c</sup> Institute for Environmental Studies (IVM), Vrije Universiteit Amsterdam, Amsterdam  
13   1081 HV, Netherlands

14   <sup>d</sup> Centre for Environment, Energy and Natural Resource Governance, Department of  
15   Land Economy, University of Cambridge, Cambridge CB2 1RX, UK.

16  
17   **This PDF file includes:**

18   Supplementary Information A

19   Supplementary Information B

20   Supplementary Information C

21   Supplementary Information D

22   Supplementary Information E

23   Supplementary Information F

24   Tables S1 to S7

25   Figs. S1 to S3

26   References

---

<sup>\*</sup>These authors contributed equally to this work.

<sup>†</sup>Corresponding authors. E-mail addresses: zhangda@tsinghua.edu.cn (D. Zhang), wangcheng@radi.ac.cn (C. Wang).

27 **Supplementary Information A: Additional tables and figures**

28 **Table S1 Data collection procedure for forest carbon offset projects**

| <b>Program</b> | <b>Number of projects</b> | Uncertified projects | Missing PDD | Missing or incomplete geoinformation <sup>a</sup> | Inconsistent geo info | Projects without issued credits | Out-of-scope satellite data (latitude within 51.6° N&S) | <b>Projects with issued credits</b> | Last issued before 2015 | Projects starting after 2019 | <b>Main sample projects</b> |
|----------------|---------------------------|----------------------|-------------|---------------------------------------------------|-----------------------|---------------------------------|---------------------------------------------------------|-------------------------------------|-------------------------|------------------------------|-----------------------------|
| <b>ACR</b>     | <b>169</b>                | 100                  | 2           | 19                                                | 1                     | 3                               | 2                                                       | <b>42</b>                           | 0                       | 3                            | <b>39</b>                   |
| <b>CAR</b>     | <b>146</b>                | 42                   | 1           | 20                                                | 0                     | 48                              | 1                                                       | <b>34</b>                           | 0                       | 0                            | <b>34</b>                   |
| <b>CDM</b>     | <b>67</b>                 | 0                    | 0           | 5                                                 | 0                     | 30                              | 0                                                       | <b>32</b>                           | 9                       | 0                            | <b>23</b>                   |
| <b>VCS</b>     | <b>144</b>                | 22                   | 1           | 50                                                | 0                     | 8                               | 1                                                       | <b>62</b>                           | 3                       | 1                            | <b>58</b>                   |
| <b>CCER</b>    | <b>100</b>                | 83                   | 7           | 2                                                 | 2                     | 4                               | 0                                                       | <b>2 (excluded)</b>                 | 0                       | 0                            | <b>0</b>                    |
| <b>GS</b>      | <b>39</b>                 | 4                    | 3           | 32 <sup>b</sup>                                   | 0                     | 0                               | 0                                                       | <b>0</b>                            | 0                       | 0                            | <b>0</b>                    |
| <b>Total</b>   | <b>665</b>                | 251                  | 14          | 128                                               | 3                     | 93                              | 4                                                       | <b>170</b>                          | 12                      | 4                            | <b>154</b>                  |

29 Note: <sup>a</sup> Here, we exclude projects that overlap due to both missing PDDs and missing or incomplete geoinformation. <sup>b</sup> The boundary shapefile data for the GS  
30 crediting program are not uploaded to official websites.

31

32 **Table S2 Robustness checks for effects of programs in 2021**

|                    | (1)                 | (2)                  |
|--------------------|---------------------|----------------------|
| Variable           | Discrepancy         | Absolute discrepancy |
| ACR                | 0.322**<br>(0.147)  | 0.280**<br>(0.135)   |
| VCS                | 1.436***<br>(0.350) | 1.880***<br>(0.289)  |
| CDM                | 2.089***<br>(0.572) | 2.239***<br>(0.521)  |
| Constant           | 0.274***<br>(0.058) | 0.365***<br>(0.040)  |
| Observations       | 158                 | 158                  |
| Adjusted R-squared | 0.114               | 0.217                |

33 Note: Heteroskedasticity-adjusted robust standard errors are in parentheses. \*\*\* p<0.01,

34 \*\* p<0.05, \* p<0.1.

35

**Table S3 Evaluating effects of programs in 2019 by removing projects with less accurately inferred values verified before 2018**

| Variable           | (1)<br>Discrepancy  | (2)<br>Absolute discrepancy |
|--------------------|---------------------|-----------------------------|
| ACR                | 0.291*<br>(0.163)   | 0.263*<br>(0.150)           |
| CDM                | 1.396***<br>(0.365) | 1.892***<br>(0.296)         |
| VCS                | 2.686***<br>(1.001) | 2.793***<br>(0.926)         |
| Constant           | 0.319***<br>(0.072) | 0.412***<br>(0.057)         |
| Observations       | 138                 | 138                         |
| Adjusted R-squared | 0.123               | 0.249                       |

Note: Heteroskedasticity-adjusted robust standard errors are in parentheses. \*\*\* p<0.01,

\*\* p<0.05, \* p<0.1.

40 **Table S4 Precision level and confidence interval of ex-post third-party verified**  
 41 **carbon stock densities by methodology**

| Methodology                                          | Precision level | Confidence interval |
|------------------------------------------------------|-----------------|---------------------|
| ARB Compliance Offset Protocol: U.S. Forest Projects | 5%              | 90%                 |
| AR-ACM0003                                           | 10%             | 90%                 |
| AR-ACM0001                                           | 10%             | 90%                 |
| AR-AM0005                                            | 10%             | 90%                 |
| AR-AM0004                                            | 10%             | 90%                 |
| AR-AM0014                                            | 10%             | 90%                 |
| AR-AM0003                                            | 10%             | 95%                 |
| AR-AM0002                                            | 10%             | 90%                 |
| AR-AM0001                                            | 10%             | 95%                 |
| AR-AMS0001                                           | 10%             | 95%                 |
| AR-AMS0007                                           | 10%             | 90%                 |

42

43 **Table S5 Evaluating effects of methodologies in 2019**

|                            | (1)         | (2)                  |
|----------------------------|-------------|----------------------|
| Variable                   | Discrepancy | Absolute discrepancy |
| Small-scale                | 1.367*      | 0.999                |
|                            | (0.794)     | (0.735)              |
| Constant                   | 0.619***    | 0.608***             |
|                            | (0.111)     | (0.096)              |
| Program fixed effects      | YES         | YES                  |
| Tree species fixed effects | YES         | YES                  |
| Observations               | 154         | 154                  |
| Adjusted R-squared         | 0.195       | 0.254                |

44 Note: Heteroskedasticity-adjusted robust standard errors are in parentheses. \*\*\* p<0.01,

45 \*\* p<0.05, \* p<0.1.

46 **Table S6 Evaluating effects of the characteristics of the host country in 2019**

|                            | (1)                 | (2)                  | (3)                  | (4)                  | (5)                  | (6)                  |
|----------------------------|---------------------|----------------------|----------------------|----------------------|----------------------|----------------------|
| Variable                   | Discrepancy         | Discrepancy          | Discrepancy          | Absolute discrepancy | Absolute discrepancy | Absolute discrepancy |
| High- or Upper-middle      | -1.503**<br>(0.582) |                      | -0.770<br>(0.630)    | -1.359***<br>(0.501) |                      | -0.993*<br>(0.552)   |
| High BRDR                  |                     | -2.149***<br>(0.600) | -1.802***<br>(0.663) |                      | -1.348**<br>(0.529)  | -0.900<br>(0.581)    |
| Constant                   | 2.126**<br>(0.817)  | 2.783***<br>(0.824)  | 3.207***<br>(0.893)  | 1.971***<br>(0.703)  | 1.965***<br>(0.726)  | 2.511***<br>(0.782)  |
| Program fixed effects      | YES                 | YES                  | YES                  | YES                  | YES                  | YES                  |
| Tree species fixed effects | YES                 | YES                  | YES                  | YES                  | YES                  | YES                  |
| Observations               | 154                 | 154                  | 154                  | 154                  | 154                  | 154                  |
| Adjusted R <sup>2</sup>    | 0.197               | 0.228                | 0.231                | 0.268                | 0.264                | 0.275                |

47 Note: Heteroskedasticity-adjusted robust standard errors are in parentheses. \*\*\* p<0.01, \*\* p<0.05, \* p<0.1.

48 **Table S7 List of forest carbon offset projects included in our main sample**

| Project ID | Project Name                                                       | Program | Category | Project Starting Year |
|------------|--------------------------------------------------------------------|---------|----------|-----------------------|
| 1.         | Round Valley Indian Tribes Improved Forest Management Project      | ACR     | IFM      | 2012                  |
| 2.         | Hanes Ranch Forest Carbon Project                                  | ACR     | IFM      | 2013                  |
| 3.         | Miller Forest                                                      | ACR     | IFM      | 2013                  |
| 4.         | Green Assets-Brookgreen Gardens Improved Forest Management Project | ACR     | IFM      | 2013                  |
| 5.         | Finite Carbon - The Forestland Group CT Lakes                      | ACR     | IFM      | 2013                  |
| 6.         | Brush Creek                                                        | ACR     | IFM      | 2013                  |
| 7.         | Blue Source- Goodman Improved Forest Management Project            | ACR     | IFM      | 2013                  |
| 8.         | Finite Carbon - The Forestland Group Chateaugay Woodlands IFM      | ACR     | IFM      | 2014                  |
| 9.         | Cumberland Forest Highlands IFM                                    | ACR     | IFM      | 2015                  |
| 10.        | Finite Carbon - Lyme Wyoming IFM                                   | ACR     | IFM      | 2015                  |
| 11.        | Finite Carbon - Colville IFM                                       | ACR     | IFM      | 2015                  |
| 12.        | Finite Carbon - Tennessee River Gorge Trust IFM                    | ACR     | IFM      | 2015                  |
| 13.        | Finite Carbon - Cook's Branch Conservancy IFM                      | ACR     | IFM      | 2015                  |
| 14.        | Bewley Ranches                                                     | ACR     | IFM      | 2014                  |
| 15.        | Green Assets - Lukens Avoided Conversion Project                   | ACR     | IFM      | 2015                  |
| 16.        | Green Assets - Milbury Avoided Conversion Project                  | ACR     | IFM      | 2015                  |
| 17.        | Blue Source - Powellton Improved Forest Management Project         | ACR     | IFM      | 2015                  |
| 18.        | Green Assets - HMWCF-I Avoided Conversion Project                  | ACR     | IFM      | 2016                  |
| 19.        | Green Assets - HMWCF-II Avoided Conversion Project                 | ACR     | IFM      | 2016                  |
| 20.        | Green Diamond Resource Company Klamath East IFM                    | ACR     | IFM      | 2015                  |
| 21.        | Green Diamond Resource Company Klamath West IFM                    | ACR     | IFM      | 2014                  |
| 22.        | Blue Source - Allegheny Improved Forest Management Project         | ACR     | IFM      | 2015                  |

|     |                                                                               |     |     |      |
|-----|-------------------------------------------------------------------------------|-----|-----|------|
| 23. | Cumberland Forest - Lonesome Pine Improved Forest Management Project          | ACR | IFM | 2015 |
| 24. | Blue Source - Marmet Improved Forest Management Project                       | ACR | IFM | 2015 |
| 25. | Blue Source - Wisconsin Northern Highlands Improved Forest Management Project | ACR | IFM | 2015 |
| 26. | Blue Creek                                                                    | ACR | IFM | 2015 |
| 27. | Finite Carbon - Massachusetts Audubon Society IFM                             | ACR | IFM | 2015 |
| 28. | Camp Shelby Forest Carbon Project                                             | ACR | IFM | 2015 |
| 29. | Congaree River                                                                | ACR | IFM | 2015 |
| 30. | Blue Source - Great Mountain Forest Improved Forest Management Project        | ACR | IFM | 2015 |
| 31. | Cappell Creek Improved Forest Management Project                              | ACR | IFM | 2017 |
| 32. | Lord Ellis Improved Forest Management Project                                 | ACR | IFM | 2016 |
| 33. | Blue Source - Wilderness Lakes Improved Forest Management Project             | ACR | IFM | 2016 |
| 34. | Finite Carbon - MWF Ned Lake IFM                                              | ACR | IFM | 2017 |
| 35. | Finite Carbon - Meriwether IFM                                                | ACR | IFM | 2018 |
| 36. | Bluesource - Baskahegan Improved Forest Management Project                    | ACR | IFM | 2018 |
| 37. | Forest Carbon Works Stewart Family Forest Project                             | ACR | IFM | 2018 |
| 38. | The Nature Conservancy - Upper St. John Forest IFM Project                    | ACR | IFM | 2018 |
| 39. | Bluesource - Edge of Appalachia Improved Forest Management Project            | ACR | IFM | 2018 |
| 40. | Ashford III                                                                   | CAR | IFM | 2014 |
| 41. | Yurok Tribe/Forest Carbon Partners CKGG Improved Forest Management Project    | CAR | IFM | 2012 |
| 42. | Buckeye Forest Project                                                        | CAR | IFM | 2013 |
| 43. | Blue Source - Bishop Improved Forest Management Project                       | CAR | IFM | 2012 |
| 44. | CF Ataya IFM                                                                  | CAR | IFM | 2015 |
| 45. | Finite Carbon - Potlatch Moro Big Pine CE IFM                                 | CAR | IFM | 2006 |
| 46. | Finite Carbon - JTO Champion Property IFM                                     | CAR | IFM | 2009 |
| 47. | Chugach Alaska Forest Carbon Project                                          | CAR | IFM | 2017 |
| 48. | Brushy Mountain                                                               | CAR | IFM | 2014 |

|     |                                                                                    |     |     |      |
|-----|------------------------------------------------------------------------------------|-----|-----|------|
| 49. | Garcia River Forest - ARB                                                          | CAR | IFM | 2004 |
| 50. | Gualala River Forest - ARB                                                         | CAR | IFM | 2003 |
| 51. | Big River / Salmon Creek Forests - ARB                                             | CAR | IFM | 2007 |
| 52. | Montesol - Forest Carbon Partners Improved Forest Management Project               | CAR | IFM | 2016 |
| 53. | Farm Cove Community Forest                                                         | CAR | IFM | 2014 |
| 54. | Finite Carbon - Alma Land Company IFM                                              | CAR | IFM | 2015 |
| 55. | Finite Carbon - Lyme Brimstone Timberlands IFM                                     | CAR | IFM | 2007 |
| 56. | Van Eck Forest                                                                     | CAR | IFM | 2001 |
| 57. | Finite Carbon - Lyme Logan IFM                                                     | CAR | IFM | 2015 |
| 58. | Finite Carbon - MWF Adirondacks IFM                                                | CAR | IFM | 2015 |
| 59. | Finite Carbon - Upper Hudson Woodlands ATP IFM                                     | CAR | IFM | 2015 |
| 60. | Finite Carbon - West Grand Lake IFM                                                | CAR | IFM | 2015 |
| 61. | Finite Carbon - Passamaquoddy Tribe IFM                                            | CAR | IFM | 2014 |
| 62. | Forest Carbon Partners - Berea College Improved Forest Management Project          | CAR | IFM | 2015 |
| 63. | Forest Carbon Partners - Gabrych Ranch Improved Forest Management Project          | CAR | IFM | 2014 |
| 64. | Hollow Tree                                                                        | CAR | IFM | 2015 |
| 65. | Forest Carbon Partners - Mescalero Apache Tribe Improved Forest Management Project | CAR | IFM | 2015 |
| 66. | Forest Carbon Partners -- Eddie Ranch Improved Forest Management Project           | CAR | IFM | 2015 |
| 67. | Forest Carbon Partners -- Glass Ranch Improved Forest Management Project           | CAR | IFM | 2014 |
| 68. | Blue Source-Wolf River Improved Forest Management Project                          | CAR | IFM | 2015 |
| 69. | Mailliard Ranch                                                                    | CAR | IFM | 2015 |
| 70. | Virginia Conservation Forestry Program - Clifton Farm                              | CAR | IFM | 2015 |
| 71. | Virginia Conservation Forestry Program - Rich Mountain                             | CAR | IFM | 2015 |
| 72. | Virginia Conservation Forestry Program - Tazewell - Elk Garden                     | CAR | IFM | 2015 |
| 73. | Monte Rio Improved Forest Management Project                                       | CAR | IFM | 2019 |
| 74. | Facilitating Reforestation for Guangxi Watershed Management in Pearl River Basin   | CDM | AR  | 2006 |

|     |                                                                                                                         |     |    |      |
|-----|-------------------------------------------------------------------------------------------------------------------------|-----|----|------|
| 75. | Uganda Nile Basin Reforestation Project No.3                                                                            | CDM | AR | 2007 |
| 76. | Reforestation as Renewable Source of Wood Supplies for Industrial Use in Brazil                                         | CDM | AR | 2000 |
| 77. | Humbo Ethiopia Assisted Natural Regeneration Project                                                                    | CDM | AR | 2007 |
| 78. | Assisted Natural Regeneration of Degraded Lands in Albania                                                              | CDM | AR | 2005 |
| 79. | Reforestation on Degraded Lands in Northwest Guangxi                                                                    | CDM | AR | 2008 |
| 80. | Southern Nicaragua CDM Reforestation Project                                                                            | CDM | AR | 2003 |
| 81. | Reforestation of Grazing Lands in Santo Domingo, Argentina                                                              | CDM | AR | 2007 |
| 82. | India Himachal Pradesh Reforestation Project                                                                            | CDM | AR | 2006 |
| 83. | Ibi Batéké Degraded Savannah Afforestation Project for Fuelwood Production (Democratic Republic of Congo)               | CDM | AR | 2008 |
| 84. | Uganda Nile Basin Reforestation Project No.5                                                                            | CDM | AR | 2006 |
| 85. | Improving Rural Livelihoods through Carbon Sequestration by Adopting Environment Friendly                               | CDM | AR | 2004 |
| 86. | Kachung Forest Project Afforestation on Degraded Lands                                                                  | CDM | AR | 2006 |
| 87. | Commercial Reforestation on Lands Dedicated to Extensive Cattle Grazing Activities in the Region of Magdalena Bajo Seco | CDM | AR | 2000 |
| 88. | Uganda Nile Basin Reforestation Project No. 2                                                                           | CDM | AR | 2009 |
| 89. | Uganda Nile Basin Reforestation Project No. 1                                                                           | CDM | AR | 2008 |
| 90. | Uganda Nile Basin Reforestation Project No. 4                                                                           | CDM | AR | 2008 |
| 91. | Moldova Community Forestry Development Project.                                                                         | CDM | AR | 2006 |
| 92. | CDM Project for Forestry Restoration in Productive and Biological Corridors in the Eastern Plains of Colombia           | CDM | AR | 2005 |
| 93. | Niger Acacia Senegal Plantation Project                                                                                 | CDM | AR | 2006 |
| 94. | Small Scale Allahabad JFM A/R CDM Project on Degraded Lands in Allahabad Forest Division, Uttar Pradesh, India          | CDM | AR | 2012 |
| 95. | Small Scale Obra JFM A/R CDM Project on Degraded Lands in Obra Forest Division, Uttar Pradesh, India                    | CDM | AR | 2012 |

|      |                                                                                                          |     |    |      |
|------|----------------------------------------------------------------------------------------------------------|-----|----|------|
| 96.  | Small Scale Jhansi JFM A/R CDM Project on Degraded Lands in Jhansi Forest Division, Uttar Pradesh, India | CDM | AR | 2012 |
| 97.  | Reforestation of Degraded Grasslands in Uchindile & Mapanda, Tanzania                                    | VCS | AR | 2002 |
| 98.  | Promoting Sustainable Development through Natural Rubber Tree Plantations in Guatemala                   | VCS | AR | 2007 |
| 99.  | Restoration of Degraded Areas and Reforestation in Caceres and Cravo Norte, Colombia                     | VCS | AR | 2002 |
| 100. | TIST Program in Kenya, VCS 001                                                                           | VCS | AR | 2004 |
| 101. | TIST Program in Kenya, VCS 002                                                                           | VCS | AR | 2004 |
| 102. | TIST Program in Kenya, VCS 003                                                                           | VCS | AR | 2004 |
| 103. | TIST Program in Kenya, VCS 004                                                                           | VCS | AR | 2004 |
| 104. | TIST Program in Kenya, VCS 005                                                                           | VCS | AR | 2004 |
| 105. | Carbon Project in the Emas-taquari Biodiversity Corridor, Goiás and Mato Grosso do sul, Brazil           | VCS | AR | 2010 |
| 106. | Bukaleba Forest Project                                                                                  | VCS | AR | 2004 |
| 107. | TIST Program in Uganda, VCS 001                                                                          | VCS | AR | 2003 |
| 108. | TIST Program in Uganda, VCS 002                                                                          | VCS | AR | 2003 |
| 109. | TIST Program in Uganda, VCS 004                                                                          | VCS | AR | 2003 |
| 110. | TIST Program in Uganda, VCS 003                                                                          | VCS | AR | 2003 |
| 111. | Guanare Forest Plantations on Degraded Grasslands under Extensive Grazing                                | VCS | AR | 2006 |
| 112. | Forteko Afforestation on Degraded Grasslands under Extensive Grazing                                     | VCS | AR | 2007 |
| 113. | TIST Program in Uganda, VCS 005                                                                          | VCS | AR | 2003 |
| 114. | TIST Program in India, VCS 001                                                                           | VCS | AR | 2004 |
| 115. | TIST Program in Uganda, VCS 006                                                                          | VCS | AR | 2006 |
| 116. | TIST Program in Kenya, VCS 009                                                                           | VCS | AR | 2004 |
| 117. | Livelihoods' Mangrove Restoration Grouped Project in Senegal                                             | VCS | AR | 2009 |
| 118. | Araku Valley Livelihood Project                                                                          | VCS | AR | 2010 |
| 119. | Reforestation Project in Yingjing County, Sichuan Province                                               | VCS | AR | 2011 |
| 120. | Reforestation Project in Qinghai Province 2012                                                           | VCS | AR | 2012 |

|      |                                                                                                                                                        |     |    |      |
|------|--------------------------------------------------------------------------------------------------------------------------------------------------------|-----|----|------|
| 121. | India Sundarbans Mangrove Restoration                                                                                                                  | VCS | AR | 2010 |
| 122. | ECO <sub>2</sub> Rubber Forests Guatemala                                                                                                              | VCS | AR | 2011 |
| 123. | Agroforestry and Forest Restoration for Ecological Connectivity, Poverty Reduction and Biodiversity Conservation in Cerro San Gil, Caribbean Guatemala | VCS | AR | 2013 |
| 124. | Mitigation of GHG: Rubber based Agro-forestry System for Sustainable Development and Poverty Reduction in Pakkading, Bolikhamsay Province, Lao PDR     | VCS | AR | 2008 |
| 125. | Reforestation with Teak CO <sub>2</sub> e TEAKMEX                                                                                                      | VCS | AR | 2013 |
| 126. | Qinghai Afforestation Project                                                                                                                          | VCS | AR | 2014 |
| 127. | Hechu Afforestation Project in Anhui Province                                                                                                          | VCS | AR | 2014 |
| 128. | Puzhen Afforestation Project in Guizhou Province                                                                                                       | VCS | AR | 2014 |
| 129. | Xiguan Afforestation Project in Guizhou Province                                                                                                       | VCS | AR | 2014 |
| 130. | Jilin Linjiang Afforestation Project                                                                                                                   | VCS | AR | 2015 |
| 131. | Hunan Northern and Northwestern Area Afforestation Project                                                                                             | VCS | AR | 2017 |
| 132. | Guinan Afforestation Project                                                                                                                           | VCS | AR | 2015 |
| 133. | Liangdu Afforestation Project                                                                                                                          | VCS | AR | 2015 |
| 134. | Henan Fangcheng and Tanghe Afforestation Project                                                                                                       | VCS | AR | 2015 |
| 135. | Anhuang Afforestation Project                                                                                                                          | VCS | AR | 2016 |
| 136. | TIST Program in Kenya, VCS-CCB 010                                                                                                                     | VCS | AR | 2015 |
| 137. | Zhanjiang Mangrove Afforestation Project                                                                                                               | VCS | AR | 2015 |
| 138. | Afforestation in Cooperation with Local Landowners for Forestal San Pedro S.A                                                                          | VCS | AR | 2015 |
| 139. | Integrated Project for Reforestation and Agroforestry on Degraded Lands in Nicaragua                                                                   | VCS | AR | 2016 |
| 140. | Zhangye City Afforestation Project in Gansu Province                                                                                                   | VCS | AR | 2016 |
| 141. | Jilin Sanchazi Afforestation Project                                                                                                                   | VCS | AR | 2016 |
| 142. | Miaoling Afforestation Project                                                                                                                         | VCS | AR | 2016 |
| 143. | Huadu Afforestation Project                                                                                                                            | VCS | AR | 2016 |
| 144. | Liugui Afforestation Project                                                                                                                           | VCS | AR | 2016 |

|      |                                                                      |     |    |      |
|------|----------------------------------------------------------------------|-----|----|------|
| 145. | Gansu Tianshui Afforestation Project                                 | VCS | AR | 2016 |
| 146. | Reforestation of Degraded Lands in Sierra Leone                      | VCS | AR | 2016 |
| 147. | Reforestation of Degraded Forest Reserve Areas in Ghana, West Africa | VCS | AR | 2016 |
| 148. | Gansu Lanzhou Afforestation Project                                  | VCS | AR | 2016 |
| 149. | Shanxi Loufan Afforestation Project                                  | VCS | AR | 2016 |
| 150. | Generation Forest Group Project                                      | VCS | AR | 2016 |
| 151. | Afforestation of Degraded Grasslands in Caazapa and Guaira           | VCS | AR | 2016 |
| 152. | Afforestation of Degraded Grasslands in Vichada, Colombia            | VCS | AR | 2016 |
| 153. | Yunnan Qiubei Afforestation Project                                  | VCS | AR | 2017 |
| 154. | Unitan Afforestation and Reforestation of Grazing Lands Project      | VCS | AR | 2016 |

---

49

50

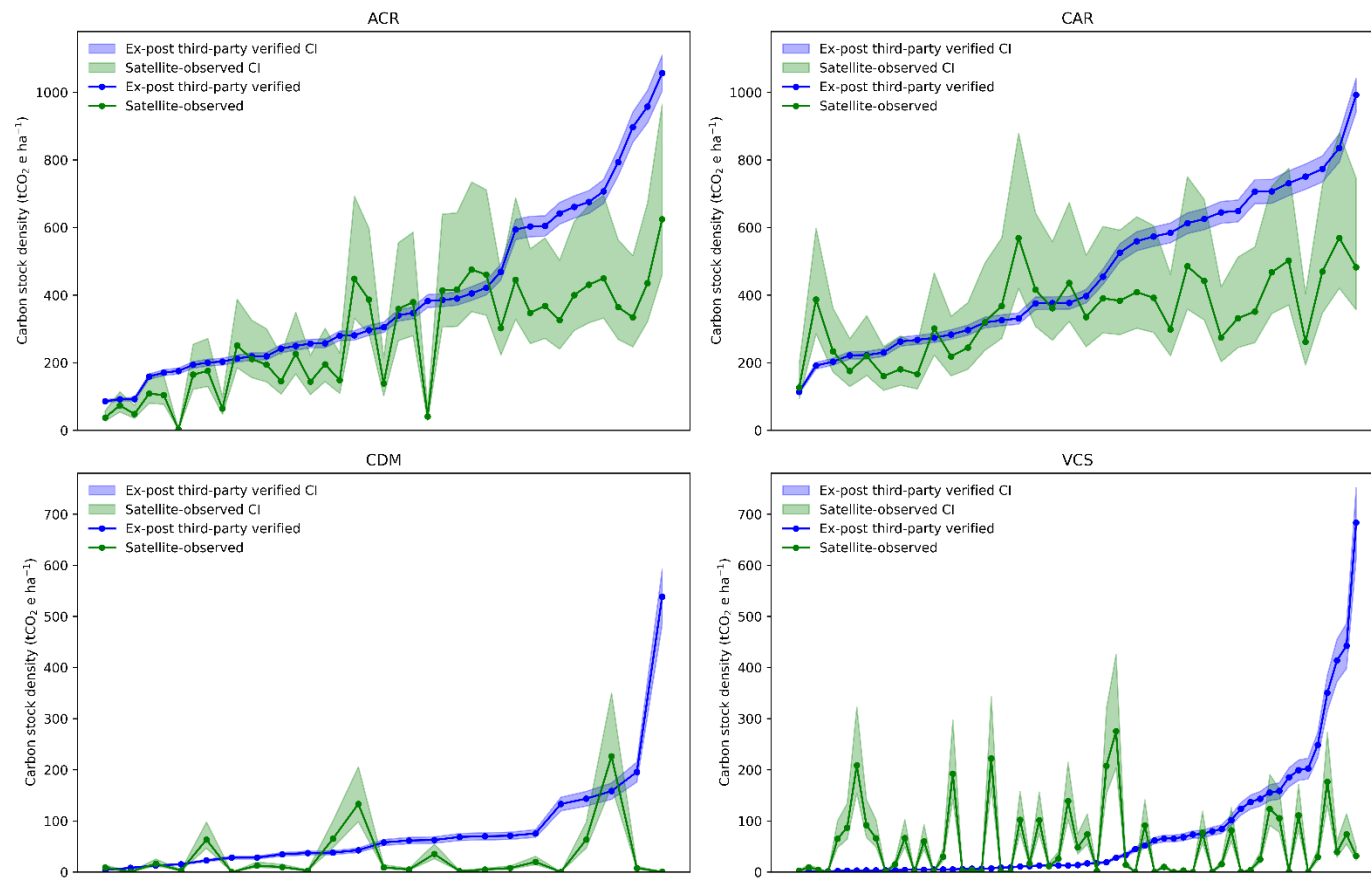

**Fig. S1 Uncertainty range associated with ex-post third-party verified and satellite-observed estimates by carbon-crediting program in 2019**

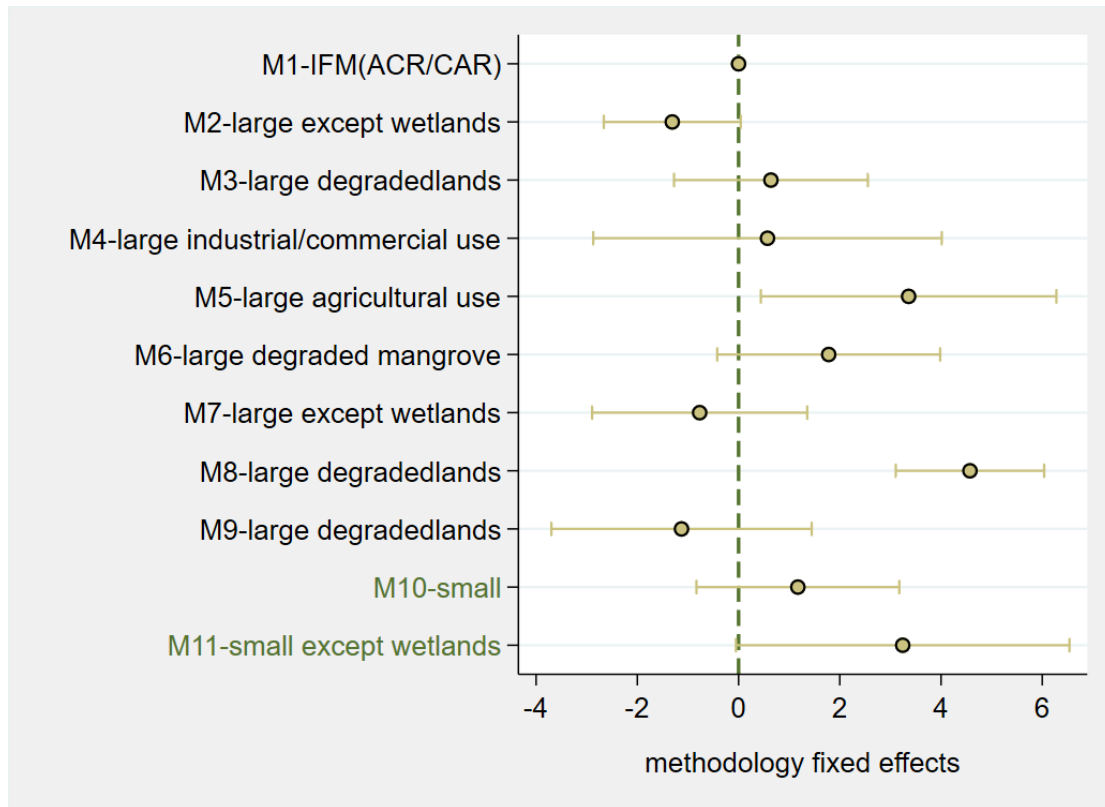

**Fig. S2 Evaluating effects of methodologies in 2019**

Note: The fixed effects of the most frequently applied methodology (M1) in our sample are normalized to zero. The order of the methodology effects abides by the applied number for large-scale methodology (M1-M9) in descending order first, followed by the applied number for small-scale methodology (M10 and M11) in descending order.

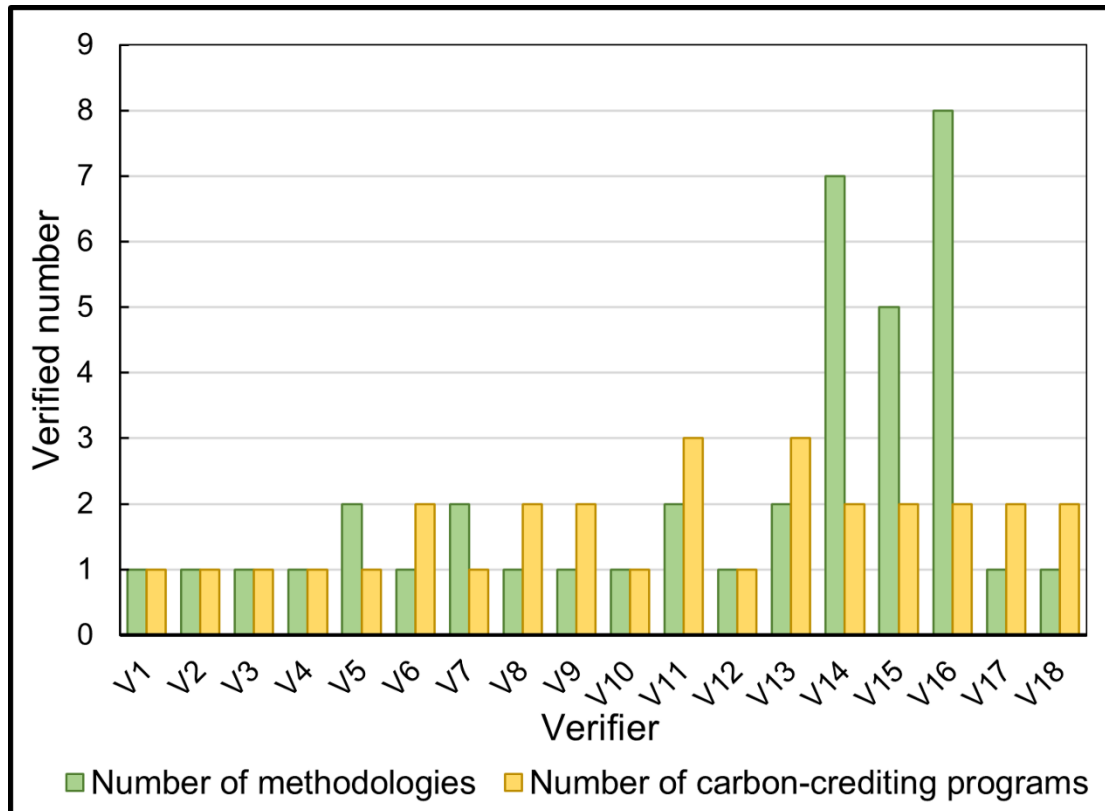

**Fig. S3 Distributions of the number of verified methodologies and verified programs for each verifier**

## **Supplementary Information B: Collection procedure for forest carbon offset projects**

From the official websites of the six carbon-crediting programs covered in this analysis, we conduct a scope search with the following terms: “Agriculture Forestry and Other Land Use (AFOLU)” for VCS<sup>1</sup>, “Afforestation and Reforestation” for CDM, CCER, and GS, “Forest Carbon” for ACR<sup>1</sup>, and “Improved Forest Management, Conservation-based Forest Management, Forestry, and Reforestation” for CAR<sup>2</sup>. Compared to AR and IFM activities, evaluating REDD activities involves more intricate baseline construction approaches<sup>3–7</sup>, and directly measuring the carbon stock in the project area would be insufficient. Therefore, we leave out all the REDD activities from our analysis. We then exclude 251 projects that had not been successfully registered by December 31, 2021. This search yields 414 forest carbon offset projects from January 1, 1999, at the earliest and still ongoing by December 31, 2021, as our initial sample.

The main objective of this analysis is to evaluate the integrity of carbon credits. We focus on the ex-post third-party on-site assessments of carbon stock, which are directly related to the amount of carbon credits issued. We then check the availability of public project information, especially regarding PDDs, monitoring reports, third-party verification reports, discernible project boundary maps, and ex-post carbon emission removal data, and we clean the raw dataset further to eliminate projects with missing key information. For the VCS, CDM, CCER, and GS programs, essential ex-ante information is disclosed in PDDs, and for the ACR and CAR programs, it is disclosed in offset project listing forms. PDDs prepared by project developers include detailed planning information, including estimations of GHG emission removal or carbon stocks

---

<sup>1</sup>Under the AFOLU category of VCS, some projects are not forest carbon offset projects, e.g., “Adjusted Water Management in Rice Cultivation in Jiashan County”, “Mangrove Restoration Project with Sine Saloum and Casamance communities, Senegal”, and “Regenerating Soil Life with Waste Management”. We thus manually review all the projects and remove those that do not meet the criteria to ensure our sample are all forest carbon offset projects.

occurring in the selected carbon pools under the project scenario and the annual ex-ante GHG emissions reduction tables over the entire crediting period, and demonstrate compliance with the requirements of a forest carbon-crediting program. Similarly, the offset project listing form describes the project activity, satisfies eligibility requirements, identifies GHG emission sources or sinks, and defines methodologies for GHG quantification. It also documents specific information required for registering an offset project with ACR or CAR<sup>8,9</sup>. A discernible project boundary map should include information about the project location, border, and area with shape files containing geographical coordinates or discernible geolocation map figures. The achieved emissions reductions or removals are regularly monitored by project developers following the plan outlined in the PDDs, which is stated in the monitoring reports under the VCS, CDM, CCER, and GS programs. Similarly, the offset project data reports (OPDRs) under the ACR and CAR programs provide documentation required by the regulation and applicable compliance offset protocols prepared by project developers for each reporting period. After that, an accredited third-party verifier is engaged to independently assess the monitoring data on-site and confirm the amount of emissions reductions or removals achieved, which determines the issuance of carbon credits that can be issued. These verified carbon removal data are disclosed in the verification reports under the VCS, CDM, CCER, and GS programs or verification statements under the ACR and CAR programs.

First, we exclude 14 projects without accessible project design documents (PDDs), also known as offset project listing forms. Subsequently, we remove 131 projects without discernible project boundary maps or inconsistent boundary maps from the provided PDDs<sup>2</sup>. The boundary shapefile data for the GS crediting program are not uploaded to official websites. At this stage, the GS program is eliminated for further analysis because no project remains with complete PDDs and discernible project boundary maps.

---

<sup>2</sup> Inconsistent boundary maps mean that the actual project boundaries outlined according to the geographical coordinates do not correspond to the project-located county provided in PDDs.

Furthermore, we eliminate 93 projects without issued carbon credits that lack ex-post carbon stock information. Finally, 4 projects outside the accessible zone of satellite data are removed, for which the latitude is between 51.6° N and S<sup>10-12</sup>, leaving 172 projects. At this stage, the CCER program is eliminated due to the insufficient sample size (2 projects). We further scrutinize the verification reports and screen out projects disclosing carbon removal verification as near to the year 2019 as possible, allowing us to extract and confidently infer the ex-post aboveground biomass carbon stocks in both 2019 and 2021. This process discards 12 projects that released verification reports prior to 2015, resulting in a final sample of 154 projects for comparative analysis in 2019. The detailed collection procedure for forest carbon offset projects is displayed in Table S1. The full list of forest carbon offset projects included is provided in Table S7.

## **Supplementary Information C: Project boundary delineation process**

We complete project boundary delineation by either delineating the boundary following detailed geolocation map figures or manually delineating the boundary based on geographical coordinates and cartographic information. Supplementary Information F demonstrates the pairwise comparisons of delineation (or manual delineation) boundaries versus ex-ante outlined boundaries in the PDDs for the estimated 154 projects. Most projects provide discernible outlined boundary maps in the PDDs under the CDM and VCS programs or offset project listing forms under the ACR and CAR programs. For some projects, discernible outlined boundaries are disclosed in monitoring reports, which are provided by project developers under the CDM and VCS programs or OPDRs under the CAR program.

For most forest carbon offset projects under VCS, ACR, and CAR (less often for projects under CDM), shape files of spatial boundaries providing detailed geolocation maps are available. Under these circumstances, we directly delineate the boundaries to determine the project location and geographic areas according to the shapefile. If the ex-ante outlined boundary map in the PDDs matches the shape file, we refer to the boundary from the shape file to estimate the real size of the project area. We scale up or scale down the scope of the outlined boundary to match the ex-ante claimed size when the size of the actual delineation area according to the shape file differs from the ex-ante claimed size. For some projects under the VCS program when the shapefiles present the coarse boundary, we manually delineate the complex boundaries of dispersed sites to match the geo-coordinates and areas provided in PDDs as much as possible. Additionally, for certain projects under the VCS program where PDDs outline the project boundary on a broader scale, we manually adjust the delineation area to match the total project area presented in PDDs.

Most projects under the CDM program lack discernible geolocation maps and provide only geographical coordinates or delimitations. We follow the complete geo-referenced

information to manually delineate each discrete area of the project boundary. For projects with incomplete geo-referenced coordinates, we confirm the project location by cross-referencing the surrounding roads and counties against the geolocation on Google Maps and delineating the project boundary to match the project area image disclosed in the PDDs. After making refined adjustments, we ensure that the manual delineations for all project geographic locations, boundaries, and estimated areas are congruent with the ex-ante descriptions and geographical coordinates presented in the PDDs.

## **Supplementary Information D: Procedure for forest carbon stocks estimated by satellites**

While the forest carbon stock consists of aboveground and belowground components, only the aboveground portion can be explicitly estimated using remote sensing methods<sup>13–15</sup>. For example, by combining aerial imagery and deep learning, Mugabowindekwe et al. (2023) mapped the aboveground carbon stock for each overstory tree at the national scale in Rwanda. Such a method can estimate the aboveground biomass by obtaining plane information on trees in farmland and savannas; however, its feasibility and accuracy in forest areas remain uncertain. In this study, we integrate the space-borne light detection and ranging (LiDAR) data from the Global Ecosystem Dynamics Investigation (GEDI) mission with satellite remote sensing images to assess aboveground carbon stocks in selected worldwide forest carbon offset projects. The GEDI utilizes an active LiDAR remote sensing technique capable of penetrating dense forest canopies and capturing vertical forest structure<sup>17,18</sup>, thereby offering more accurate aboveground biomass estimates<sup>14</sup>. However, GEDI data are spatially discrete, prompting the need for integrating wall-to-wall satellite remote sensing imagery and creating comprehensive aboveground biomass maps at the resolution of 30 metres<sup>19,20</sup>.

### **GEDI data collection and processing**

The GEDI mission, launched in December 2018 and mounted on the International Space Station, is designed to measure the vertical structure of temperate and tropical forests between 51.6° N and S<sup>10–12</sup>. The GEDI can generate full-waveform LiDAR data with a footprint diameter of 25 metres by emitting laser pulses at a wavelength of 1,064 nm<sup>10</sup>. The GEDI team processes these waveforms to estimate vegetation height metrics (relative height (RH) metrics), predict aboveground biomass density (AGBD) as a function of RH metrics for each footprint, and produce the GEDI Level 4A (L4A) footprint-level AGBD product<sup>21–23</sup>. In this study, the GEDI L4A AGBD product is used to assess the aboveground biomass of forest carbon offset projects in our sample.

To ensure high-quality GEDI data, we rely on the sensitivity metric and quality flag provided with L4A data. Our selection criteria involve choosing data with a beam sensitivity of  $\geq 0.95$  and a quality flag value of 1<sup>24–26</sup>. Furthermore, we exclusively utilize data collected at night and during the leaf-on season to eliminate the influence of solar background noise and leaf phenology interference<sup>27</sup>.

### **Sentinel data**

We utilize Sentinel-1 and Sentinel-2 datasets available on the Google Earth Engine (GEE) platform to extract feature parameters for AGBD mapping. The Sentinel-1 mission comprises a constellation of two polar-orbiting satellites that perform C-band synthetic aperture radar (SAR) imaging, allowing them to acquire imagery regardless of weather conditions<sup>28</sup>. The Sentinel-1 data used in our study are from the Level-1 Ground Range Detected (GRD) product. Given that horizontal-horizontal polarized Sentinel-1 SAR imagery does not cover the entire globe, we employ only vertical-vertical-polarized and vertical-horizontal-polarized imagery. Sentinel-2 is a polar-orbiting, multispectral, high-resolution imaging mission for land monitoring<sup>29</sup>. We utilize the atmospherically corrected L2A product with 12 bands ranging from visible and near-infrared to shortwave infrared. To mitigate the effects of cloud cover and atmospheric interference, we initially apply a cloud masking algorithm from the Open Earth Engine Library (OEEL) in the GEE and resample both the Sentinel-1 and Sentinel-2 data to a 30-metre resolution for consistency.

### **Ancillary data**

We utilize near-global-scale Shuttle Radar Topography Mission (SRTM) digital elevation data<sup>30</sup>, void-filled with open-source data, to compute the terrain elevation, slope, and aspect at an approximately 30-metre resolution. Additionally, we extract two climate feature parameters, mean annual temperature (MAT) and mean annual precipitation (MAP), from the climate data product WorldClim 2.1 and resample these datasets to a 30-metre resolution<sup>31</sup>. Forest areas are determined by employing the

GlobalLand30 V2020 land cover product, a 30-metre resolution dataset developed by China's National Geomatics Centre.

### **Estimation of the aboveground carbon stocks of the forest carbon offset project**

Forest distribution within forest carbon offset projects tends to be fragmented, and GEDI data can be sparse and discontinuous within these areas. This scarcity makes it challenging to rely solely on GEDI L4A AGBD products for an accurate estimation of aboveground carbon stocks. To address this issue, we integrate GEDI L4A data with satellite remote sensing imagery to estimate the aboveground carbon stock of each forest carbon offset project through a four-step process. (a) We identify GEDI footprint-scale AGBD samples located within forested areas of each offset project by using the GlobalLand30 data product. To avoid the potential overfitting bias, we set the minimum sample size for training as 10,000, which is sufficiently large according to the literature<sup>32,33</sup>. When the available GEDI samples within the forested areas of the carbon offset project are limited or sparse (less than 30% of projects), we use a neighbourhood expansion approach to increase the sample size to 10,000. Specifically, we select GEDI samples from buffer zones around the project area—these are regions adjacent to the project boundaries that are still part of the same forested landscape. By using a spatially extended range, we can draw on additional GEDI footprints with similar ecological characteristics, helping to increase the sample density. (b) We develop a random forest model to extend estimates beyond GEDI footprints by correlating GEDI AGBD estimates with covariate stacks from Sentinel data, the SRTM Digital Elevation Model (DEM) data, and climate data. (c) An AGBD map is generated for each forest carbon offset project by applying the AGBD estimation model to the satellite remote sensing imagery. (d) The aboveground biomass for each carbon offset project is calculated using the AGBD map and forest area data derived from the GlobalLand30 product. The aboveground biomass of the forest is then converted to carbon stocks by multiplying by the carbon fraction, which refers to the mass of carbon present in various forms within a unit volume of biomass.

### **Validation of forest carbon stock densities estimated by satellite remote sensing**

Although previous studies have justified the applicability of airborne LiDAR in assessing carbon stocks for forest offset projects<sup>34–36</sup>, to further validate our satellite remote sensing method for assessing carbon stocks of offset projects, we compare carbon stock densities derived from satellite remote sensing to those from airborne LiDAR. The airborne LiDAR data for validation in China are from our self-collected UAV LiDAR data in Chongqing area, which are obtained using the Riegl VUX-1 system, with a flight strip overlap greater than 60%. The scanner frequency was 400 kHz, with an average point density of 150 pts/m<sup>2</sup> and elevation accuracy better than 0.1 metres. Except for the validation in China, the airborne LiDAR data in other regions are adopted from the Oak Ridge National Laboratory Distributed Active Archive Centre (ORNL DAAC)<sup>37–41</sup>. In total, 24 sample forest areas are selected for validation to cover as many continents and forest types as possible, given complete airborne LiDAR data. The 24 sample sites are located in the United States, Brazil, Mozambique, Gabon, Indonesia, and China. We compute the coefficient of determination to support the validation of our satellite remote sensing method ( $R^2$ : 0.94).

## Supplementary Information E: Uncertainty associated with ex-post third-party verified and satellite-observed estimates

Ex-post third-party verified and satellite-observed aboveground biomass carbon stock estimates stem from various information that may lead to uncertainty. We calculate the claimed credits' uncertainty range between the lower and upper bound of each project based on the precision level with the confidence interval determined by the respective methodologies shown in Table S4.

Correspondingly, given our adoption of airborne LiDAR technology to validate satellite-observed aboveground biomass carbon stocks, the real error in satellite remote sensing estimation ( $X$ ) can be assessed via two major facets: the measurement uncertainty inherent in airborne LiDAR ( $Y$ ) and the satellite remote sensing error relative to airborne LiDAR ( $Z$ ). Here, we use the validation sample of 24 forest areas to estimate the average relative error of satellite remote sensing at the project level. The uncertainty of airborne LiDAR in evaluating forest carbon stocks in the plot area is set as 10% with a 90% confidence interval<sup>42</sup>. If we assume the actual carbon stock densities generated by each project is  $C_0$ . The observations derived from the airborne LiDAR and satellite remote sensing are  $C_a$  and  $C_s$ . Let  $X$  and  $Y$  be two independent variables obeying the asymptotically normal assumption shown in equation (1) and (2). We define  $Z = X/Y$  and the distribution of the ratio of two independent normals as equation (3)<sup>43</sup>.  $\sigma_y^2$  of airborne LiDAR and  $\sigma_z^2$  of the validation sample can be calculated based on our assumption. Assuming  $C_a$  and  $C_s$  are unbiased estimation in the context ( $\mu_x = \mu_y = 1$ ), the uncertainty range of satellite remote sensing estimation can be obtained as  $[0.74C_s, 1.54C_s]$ , and the calculation process is shown in the inequality (4).

$$X = \frac{C_s}{C_0}, X \sim N(\mu_x, \sigma_x^2) \quad (1)$$

$$Y = \frac{C_a}{C_0}, Y \sim N(\mu_y, \sigma_y^2) \quad (2)$$

$$296 \quad Z = \frac{X}{Y} = \frac{C_S}{C_a}, \quad Z \sim N(\mu_z, \sigma_z^2), \quad \text{where } \mu_z = \frac{\mu_x}{\mu_y} \text{ and } \sigma_z^2 = \sigma_y^2 \left( \frac{\sigma_x^2}{\sigma_y^2} + \frac{\mu_x^2}{\mu_y^2} \right) \quad (3)$$

$$297 \quad -Z\alpha_{/2} \cdot \sigma_x \leq \frac{C_S}{C_0} - \mu_x \leq Z\alpha_{/2} \cdot \sigma_x \Rightarrow \frac{C_S}{1+Z\alpha_{/2} \cdot \sigma_x} \leq C_0 \leq \frac{C_S}{1-Z\alpha_{/2} \cdot \sigma_x} \quad (4)$$

298

**Supplementary Information F: The pairwise comparisons of delineation border versus ex-ante outlined boundary for the estimated 154 projects**

Note: The left column shows boundaries provided by PDDs, and the right column shows the delineated boundaries according to discernible geolocation map figures. If the shapefile that provides detailed geolocations for the project boundary is available, we directly delineate the boundary based on the shapefile. Otherwise, we manually delineate the project boundary based on geographical coordinates and cartographic information based on PDDs.

1. PDD claimed area: 2246ha

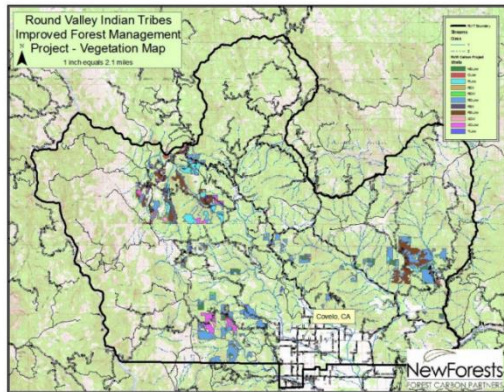

1. Delineation area: 2247.73ha

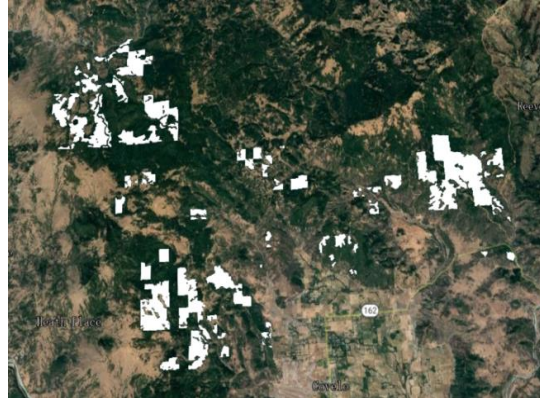

2. PDD claimed area: 968.41ha

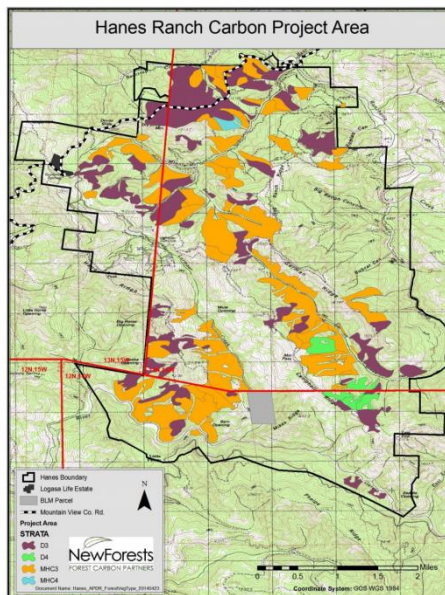

2. Delineation area: 968.88ha

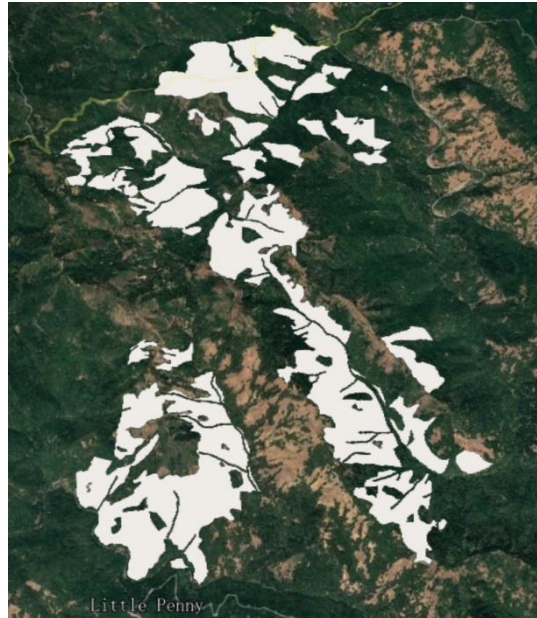

3. PDD claimed area: 641.47ha

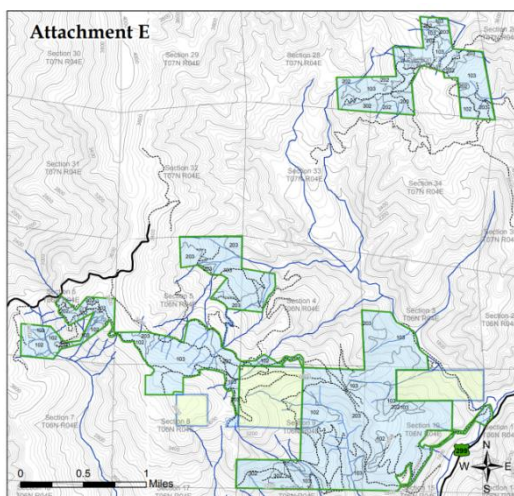

3. Delineation area: 641.93ha

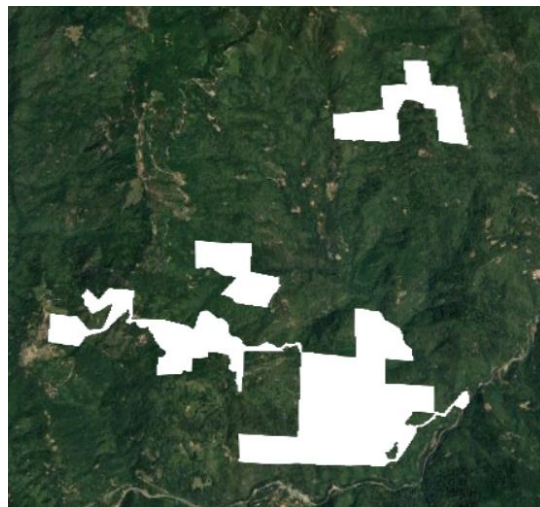

4. PDD claimed area: 1798.58ha

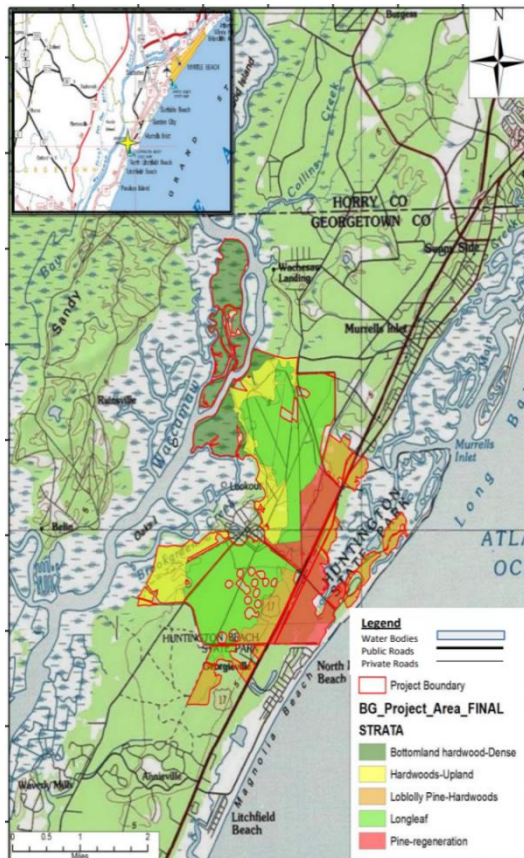

4. Delineation area: 1798.66ha

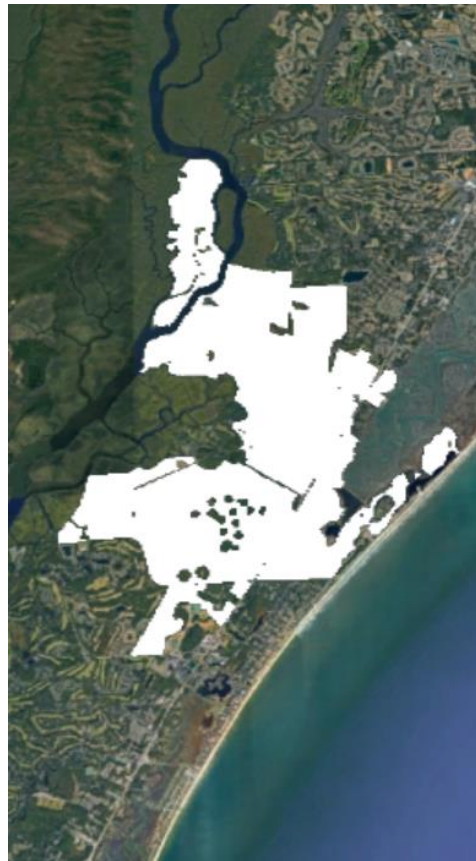

5. PDD claimed area: 57085.90ha

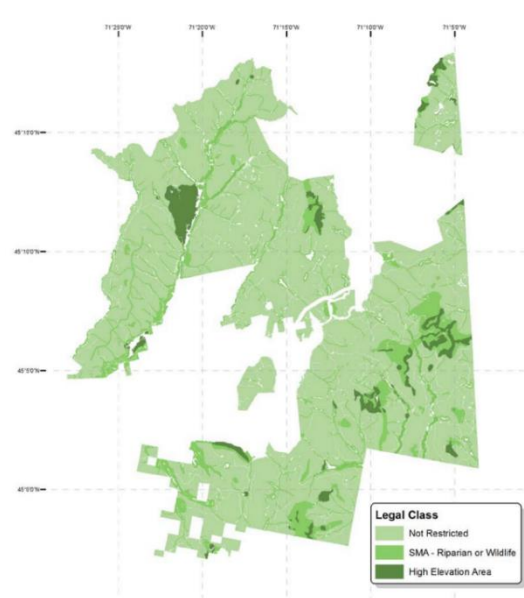

5. Delineation area: 56914.29ha

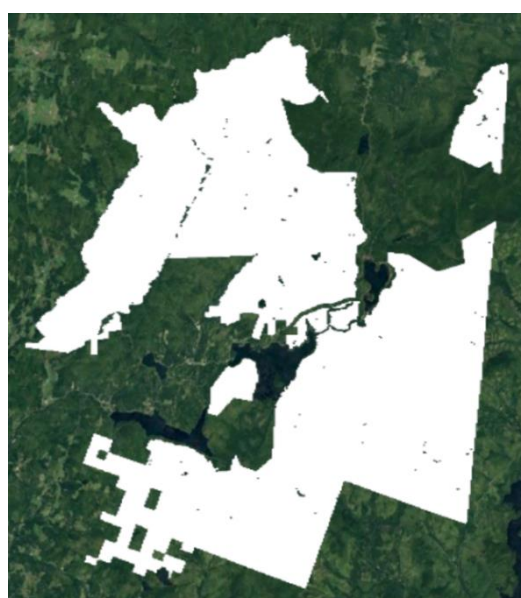

6. PDD claimed area: 713.46ha

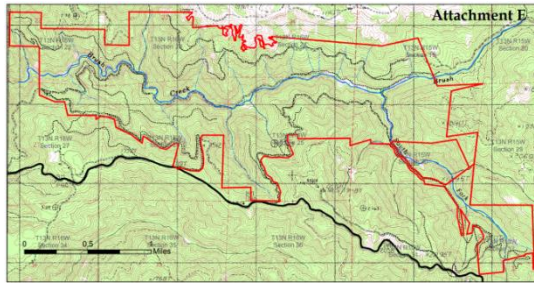

6. Delineation area: 714.15ha

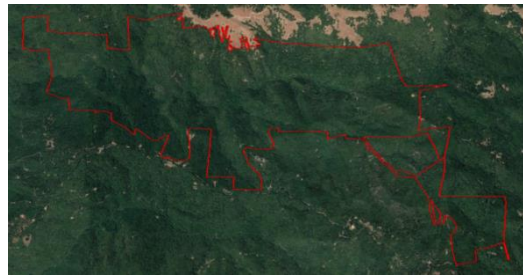

7. PDD claimed area: 11528.30ha

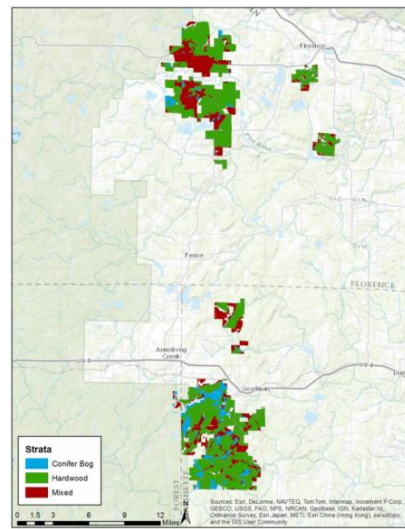

7. Delineation area: 12368.01ha

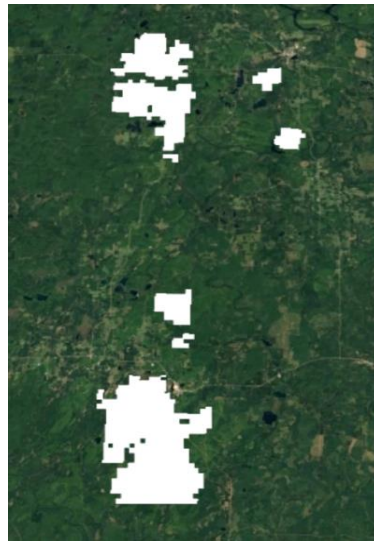

8. PDD claimed area: 32050.70ha

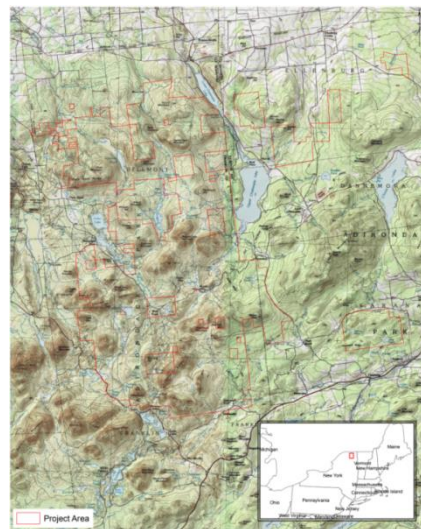

8. Delineation area: 34213.62ha

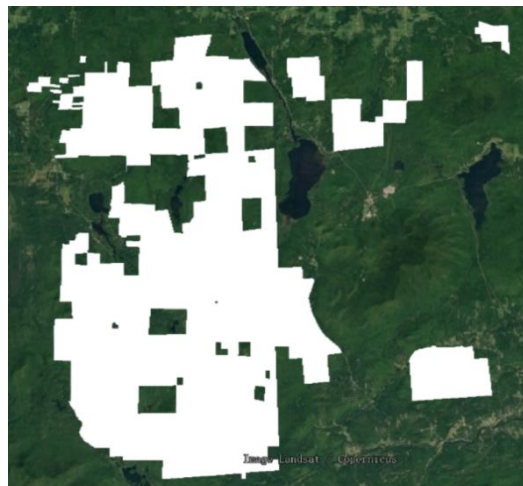

9. PDD claimed area: 39338.80ha

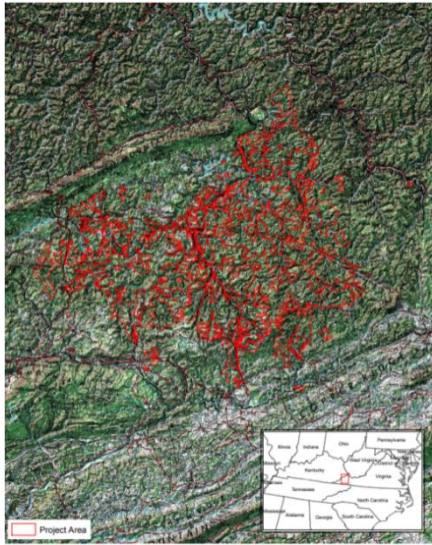

9. Delineation area: 41338.17ha

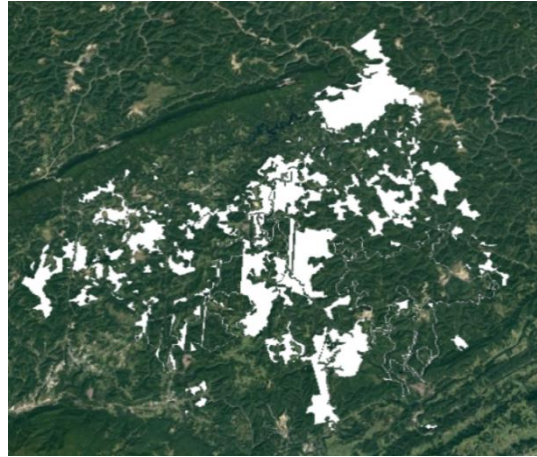

10. PDD claimed area: 39252.90ha

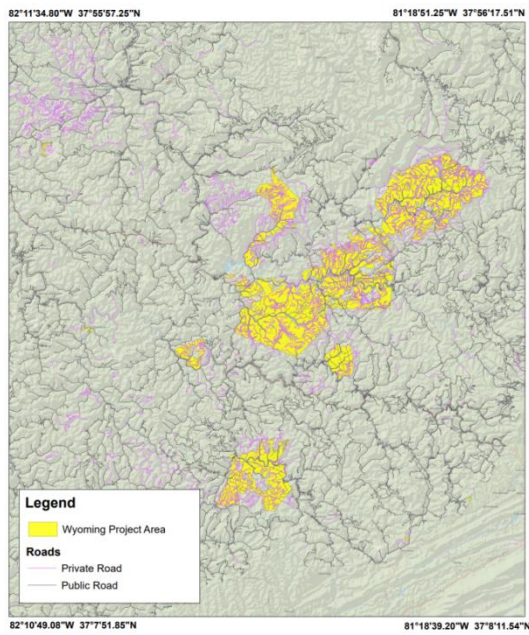

10. Delineation area: 39626.15ha

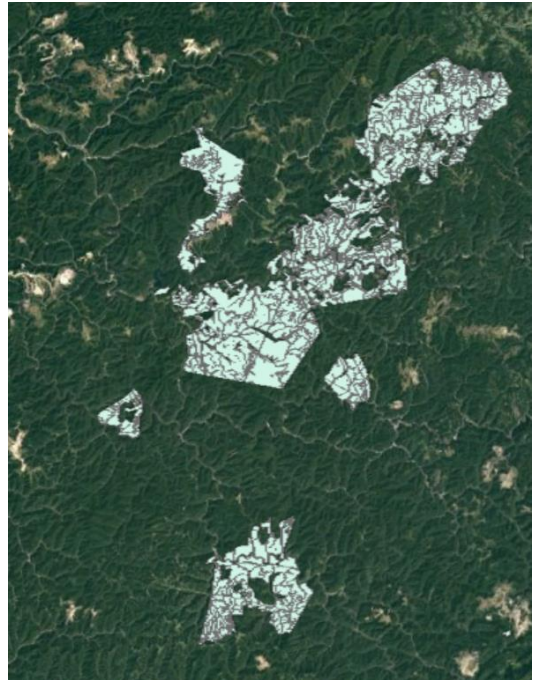

11. PDD claimed area: 183333.00ha

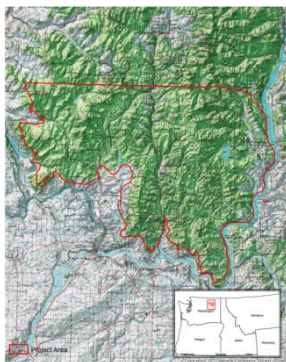

11. Delineation area: 183954.26ha

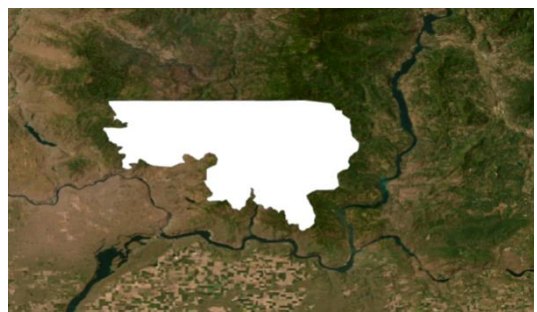

12. PDD claimed area: 2296.36ha

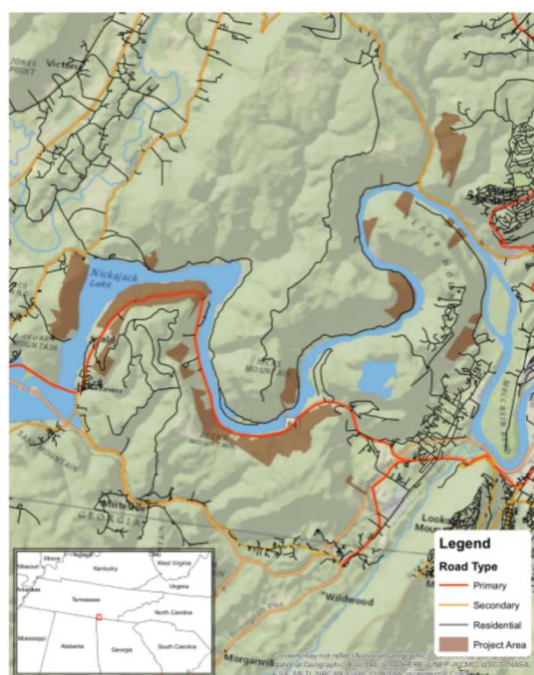

12. Delineation area: 2324.35ha

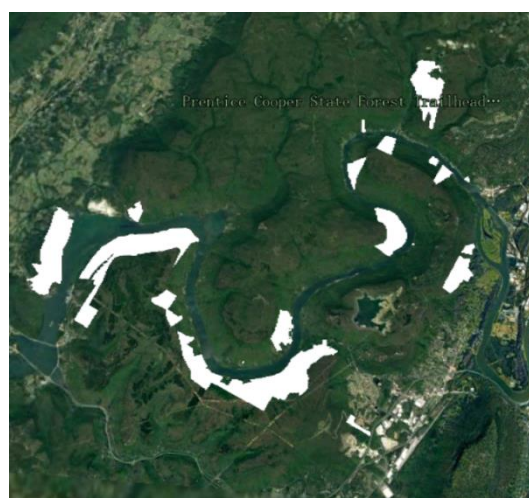

13. PDD claimed area: 2181.26ha

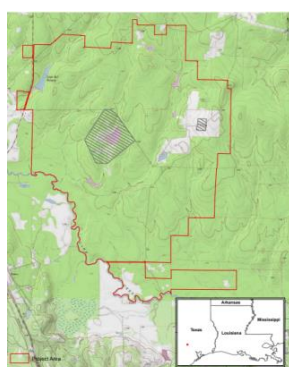

13. Delineation area: 2102.07ha

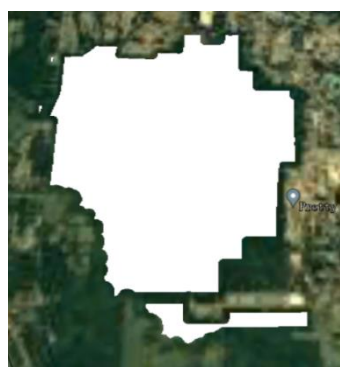

14. PDD claimed area: 5327.71ha

14. Delineation area: 5331.71ha

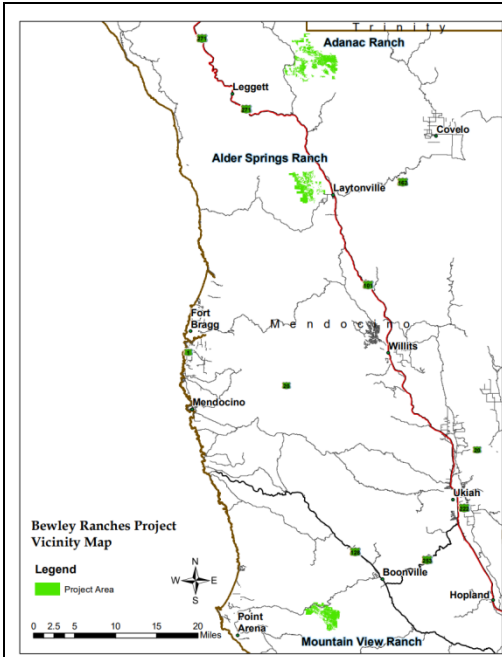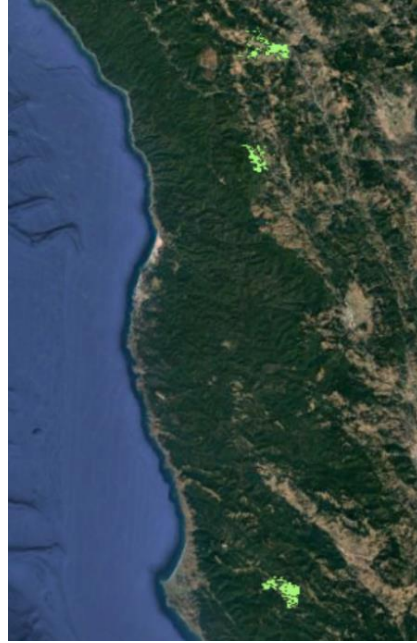

15. PDD claimed area: 1673.33ha

15. Delineation area: 1673.86ha

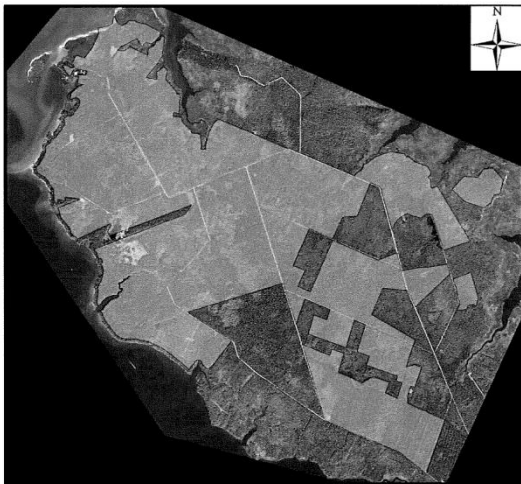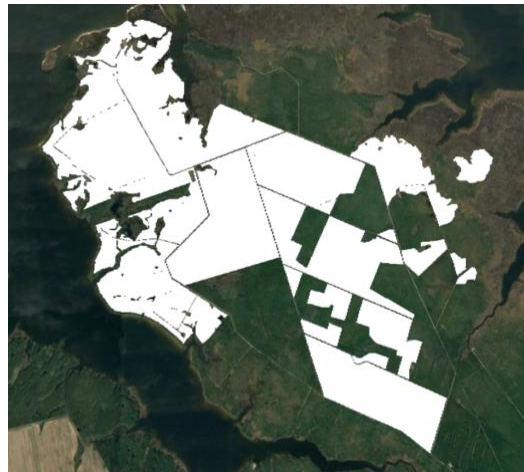

16. PDD claimed area: 3446.21ha

16. Delineation area: 3450.03ha

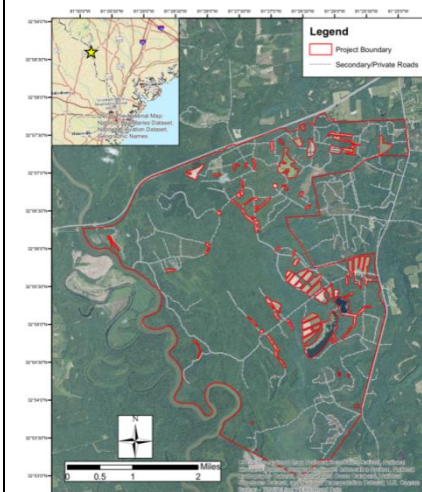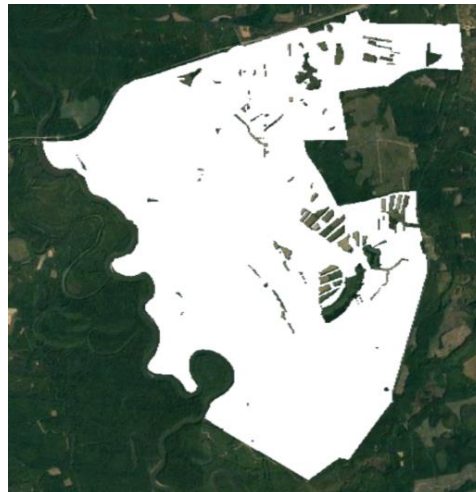

17. PDD claimed area: 14955.60ha

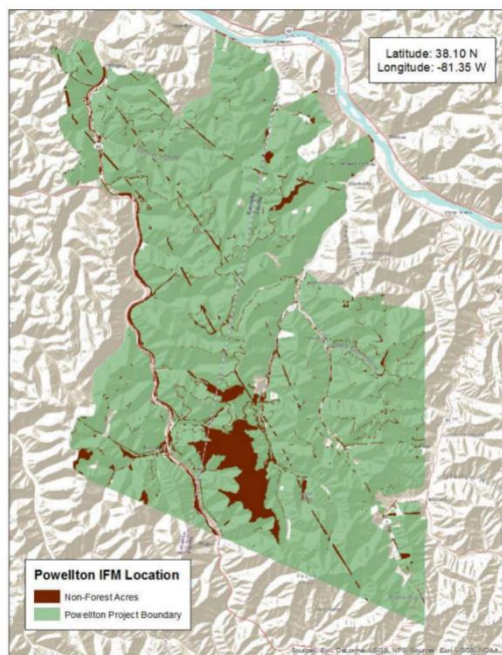

17. Delineation area: 16188.86ha

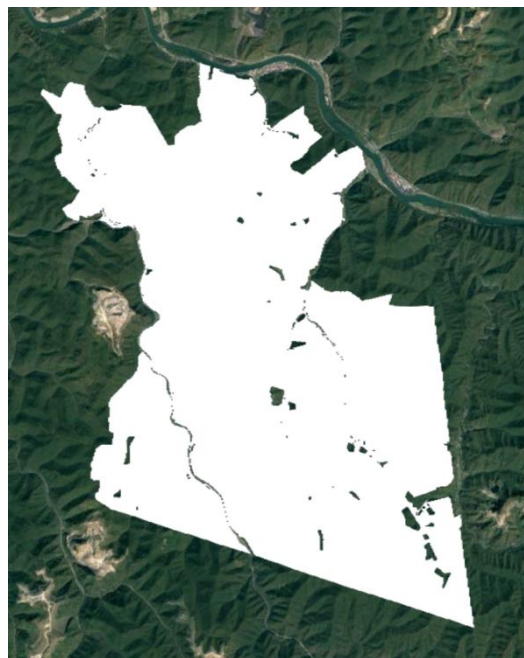

18. PDD claimed area: 35852.20ha

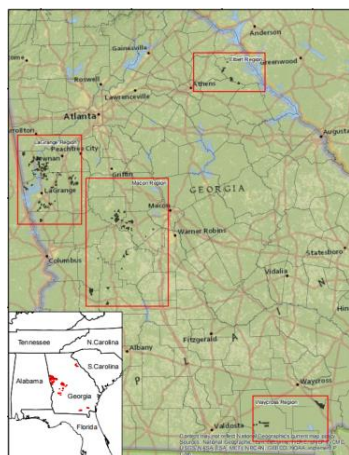

18. Delineation area: 37550.07ha

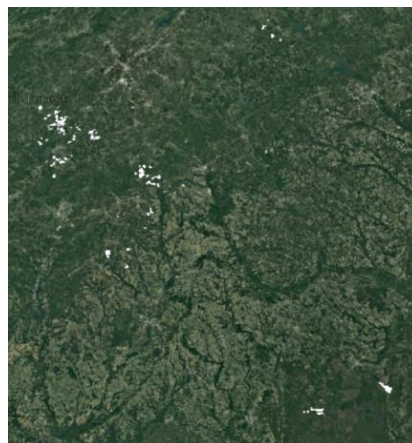

19. PDD claimed area: 23630.40ha

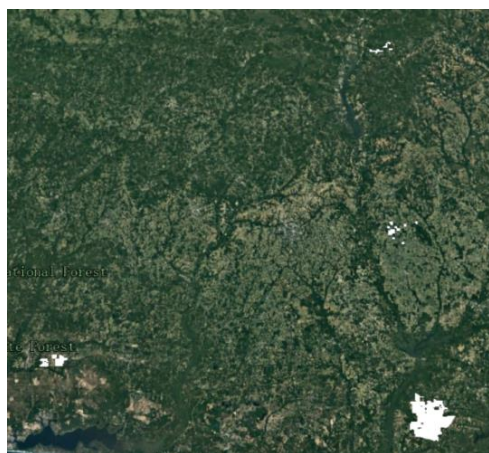

19. Delineation area: 24255.57ha

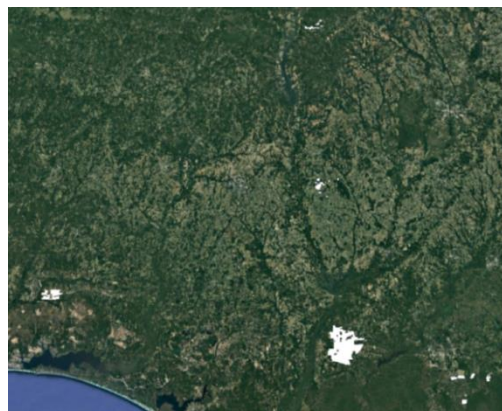

20. PDD claimed area: 162825ha

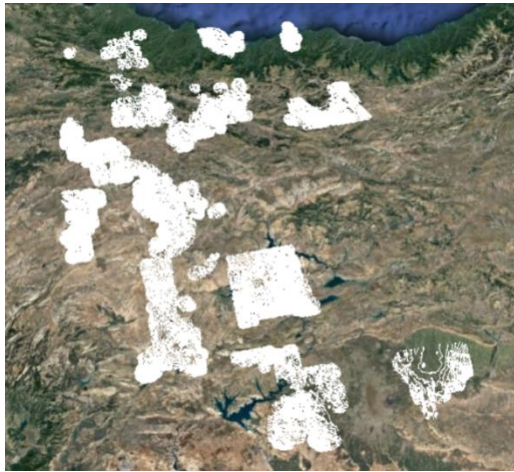

20. Delineation area: 162846.05ha

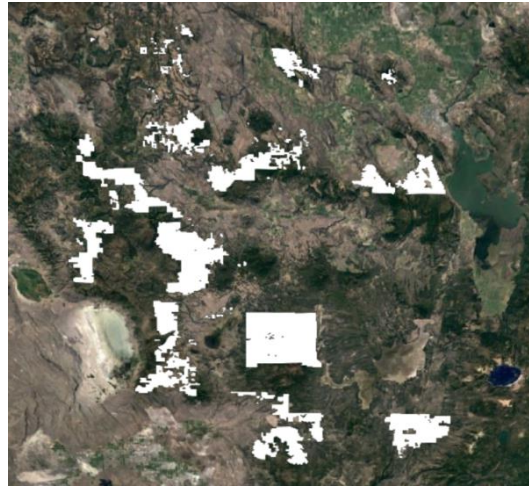

21. PDD claimed area: 74923.50ha

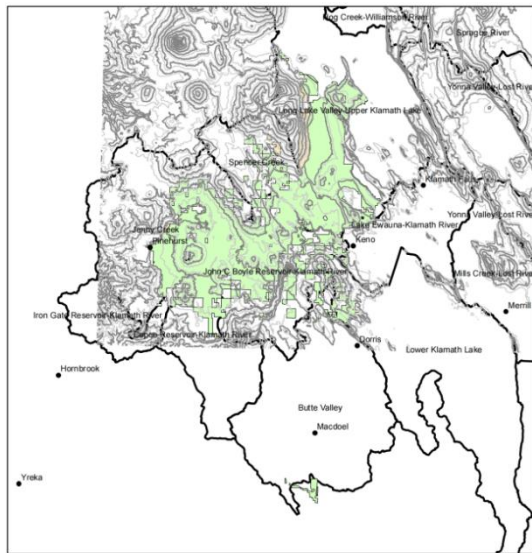

21. Delineation area: 74904.82ha

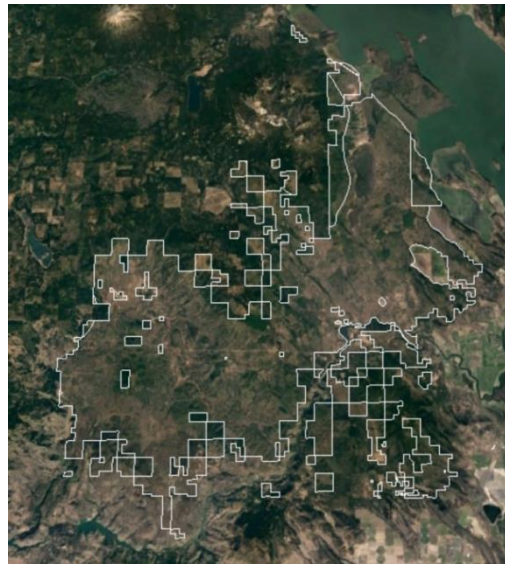

22. PDD claimed area: 17377.20ha

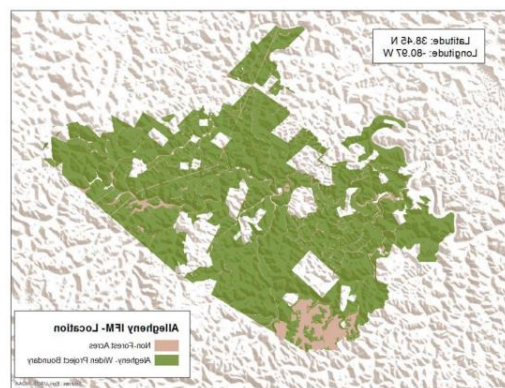

22. Delineation area: 18894.38ha

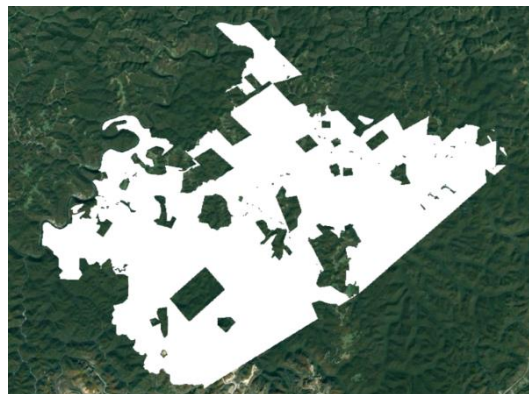

23. PDD claimed area: 8537.65ha

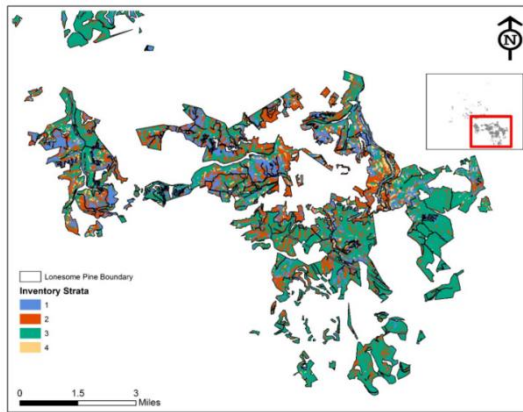

23. Manual delineation area: 8509.43ha

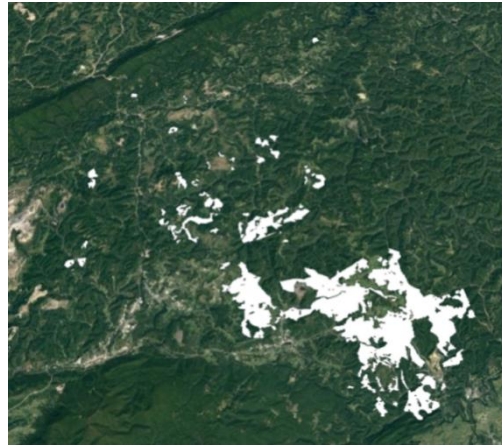

24. PDD claimed area: 13806.30ha

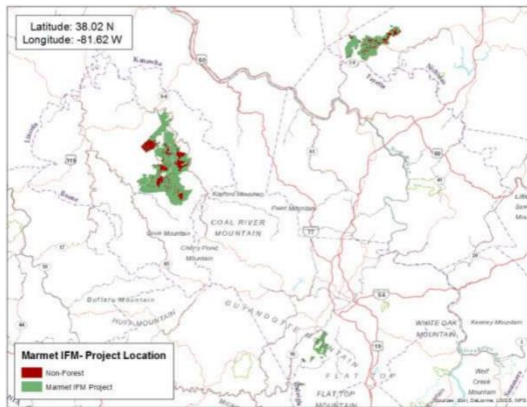

24. Delineation area: 13939.07ha

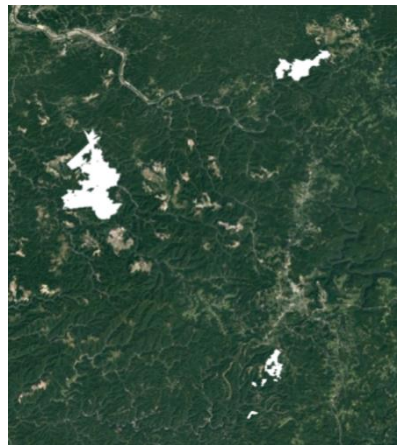

25. PDD claimed area: 5546.62ha

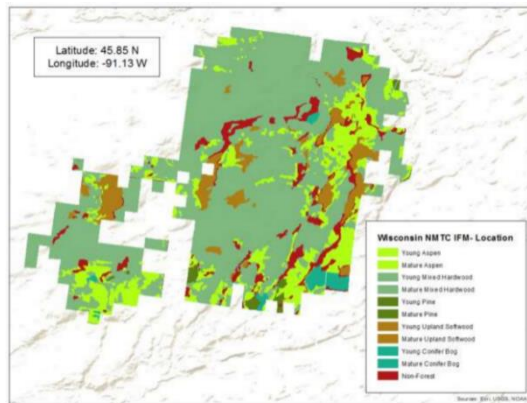

25. Delineation area: 5550.10ha

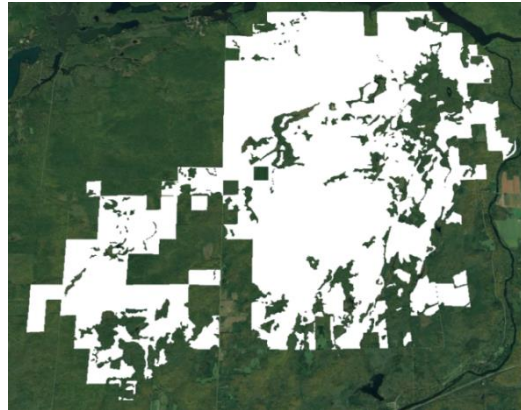

26. PDD claimed area: 6064.33ha

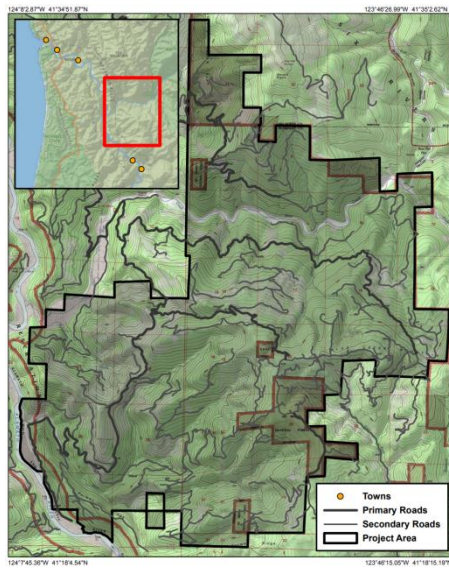

26. Delineation area: 6068.43ha

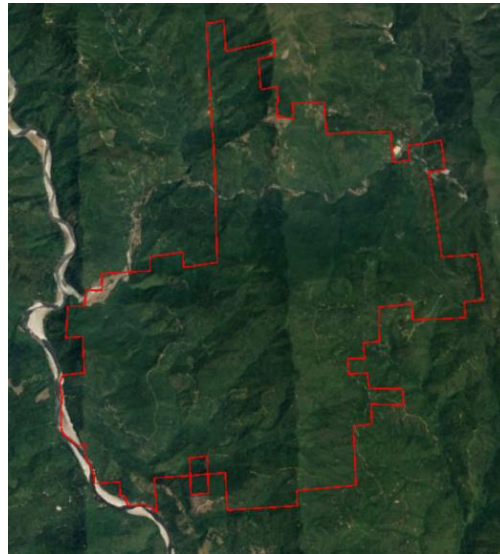

27. PDD claimed area: 2906.85ha

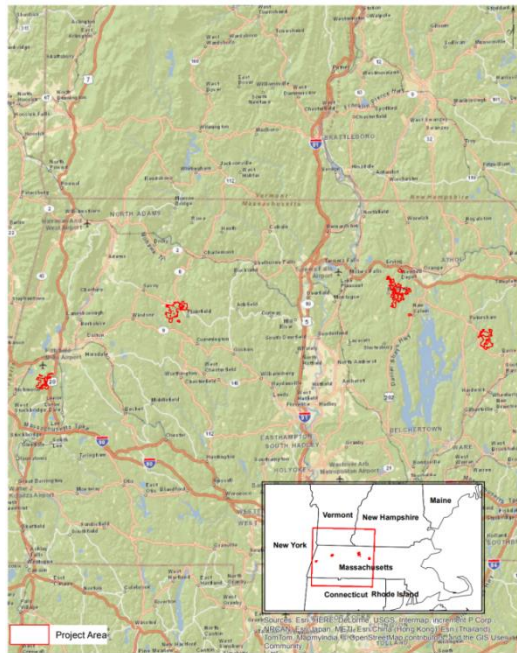

27. Delineation area: 2906.90ha

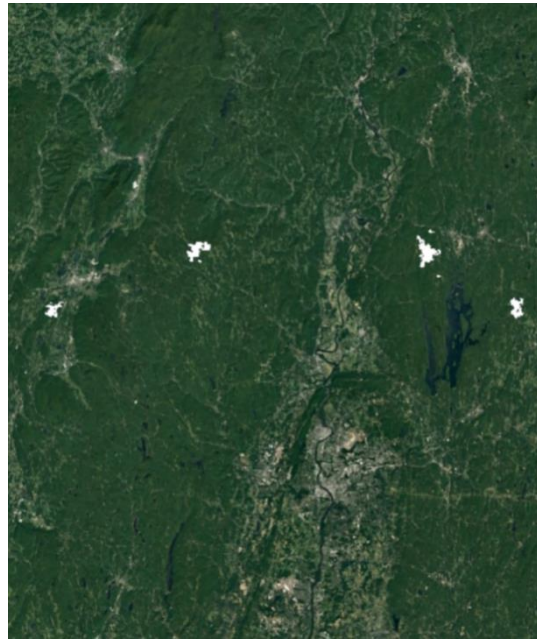

28. PDD claimed area: 427.34ha

28. Delineation area: 421.26ha

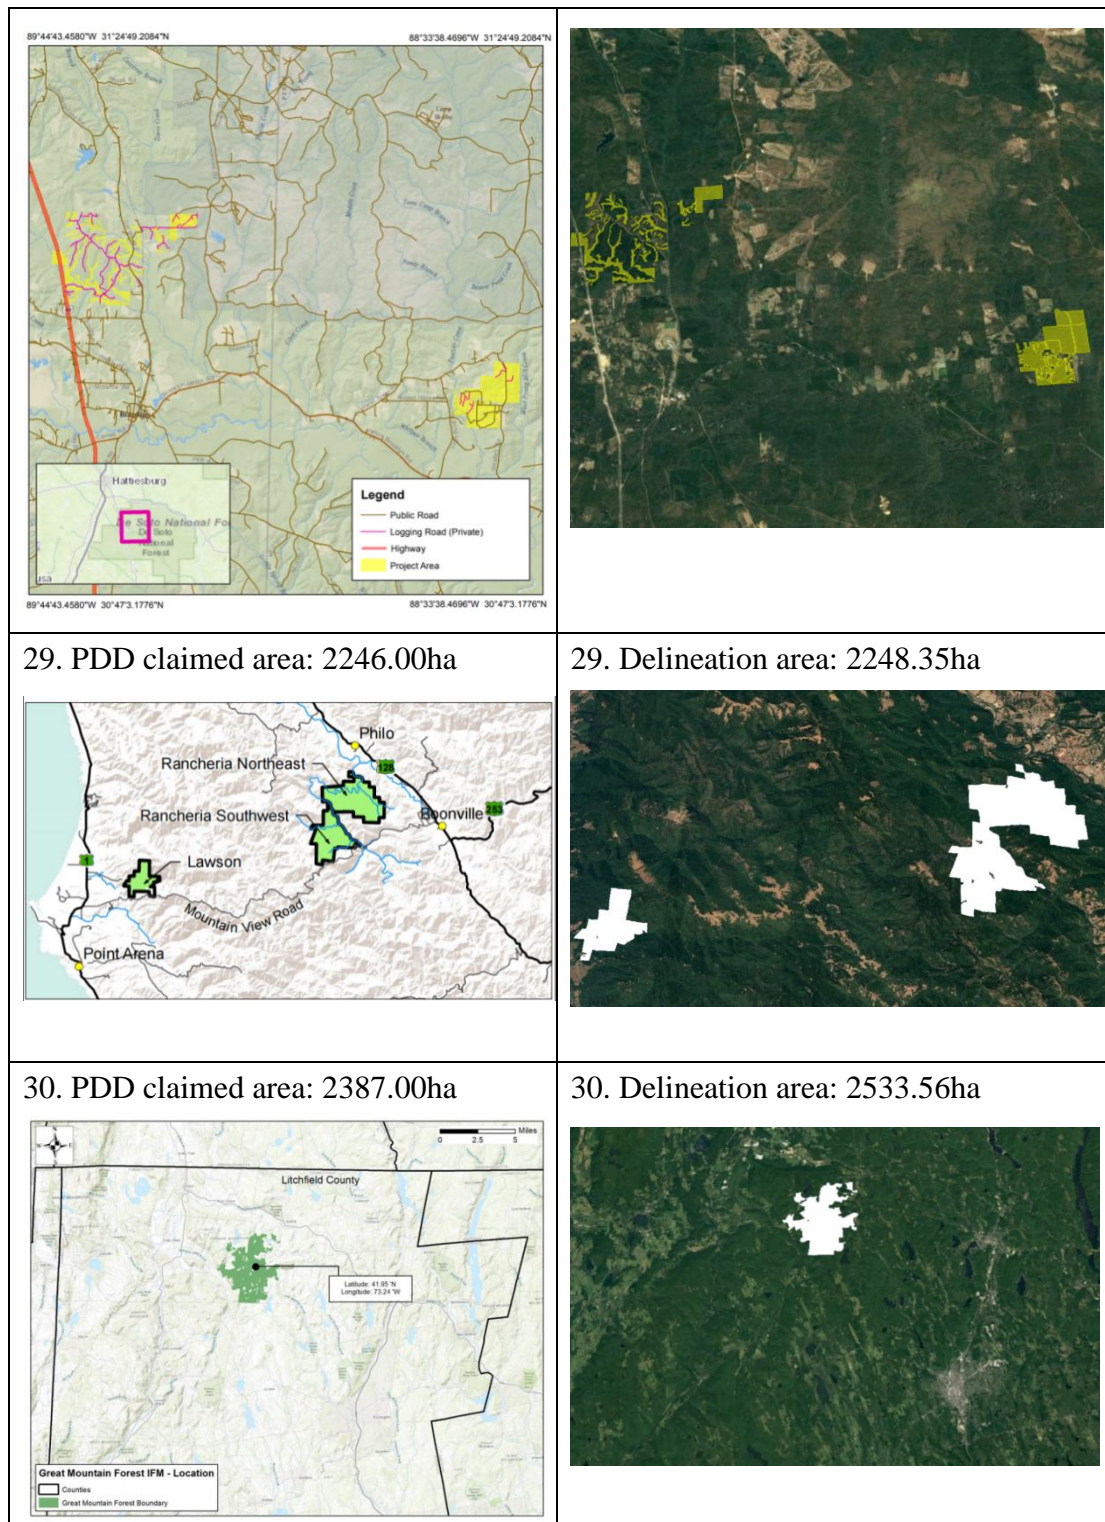



33. PDD claimed area: 2399.38ha

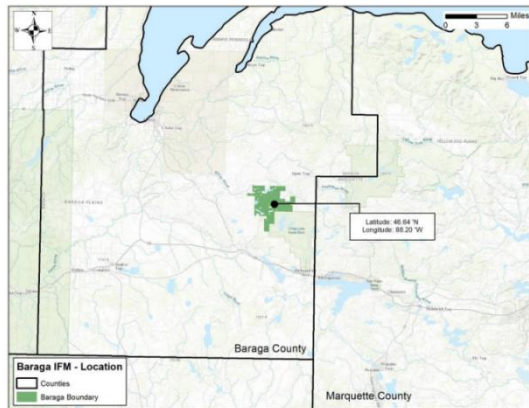

33. Delineation area: 2400.67ha

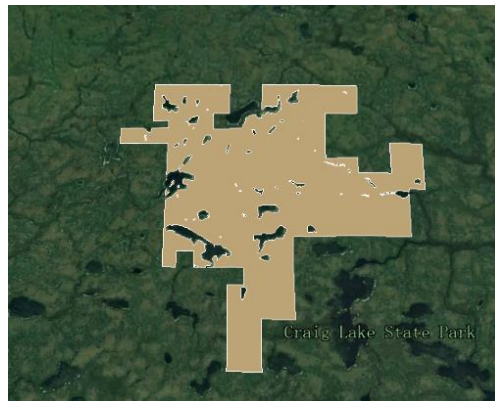

34. PDD claimed area: 18158.50ha

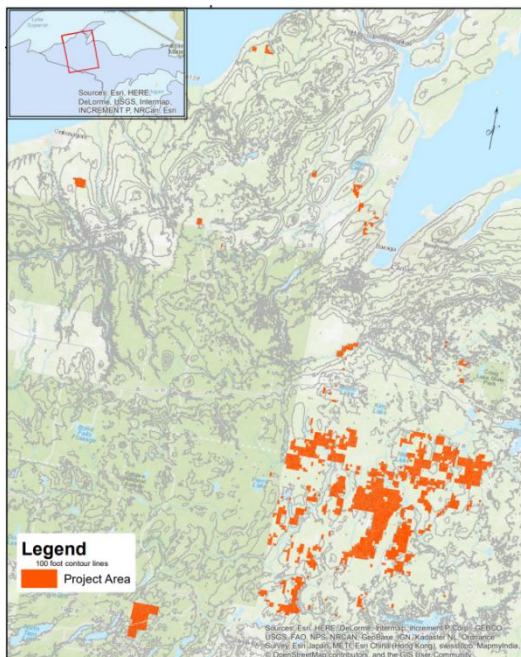

34. Delineation area: 18315.00 ha

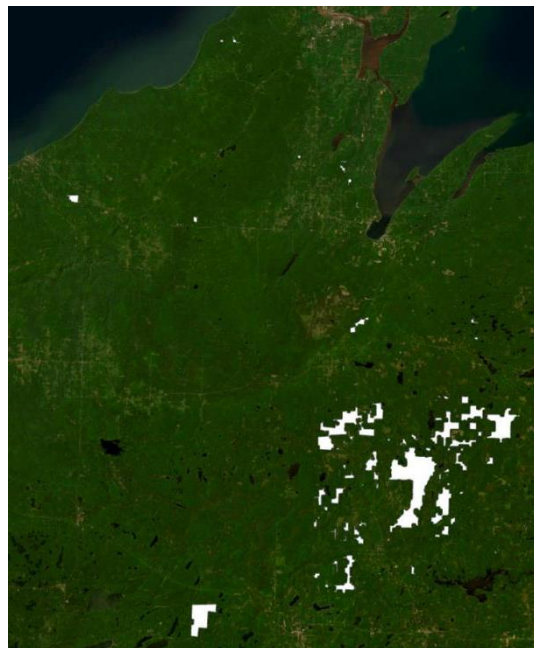

35. PDD claimed area: 433.01ha

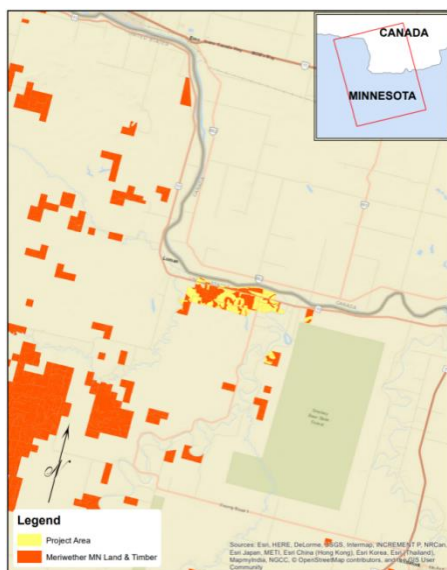

35. Delineation area: 433.31ha

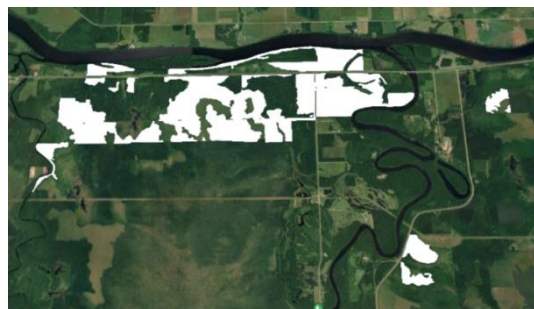

36. PDD claimed area: 34816.70ha

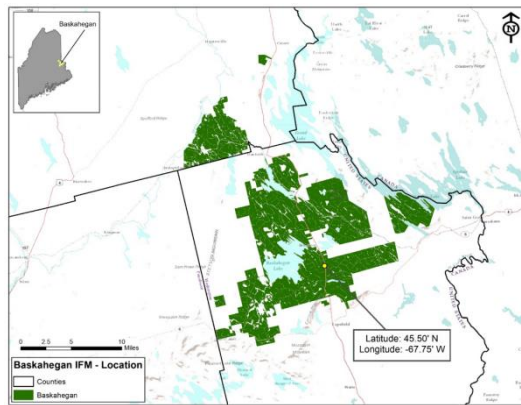

36. Delineation area: 34836.92ha

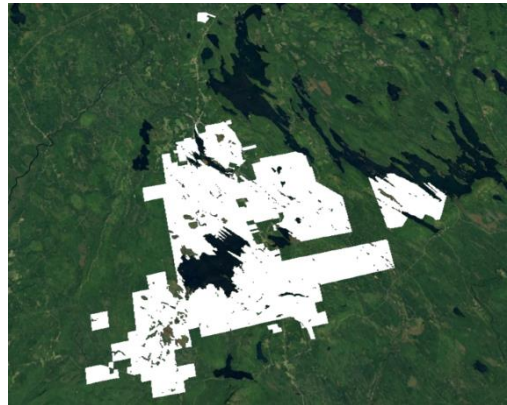

37. PDD claimed area: 47.75ha

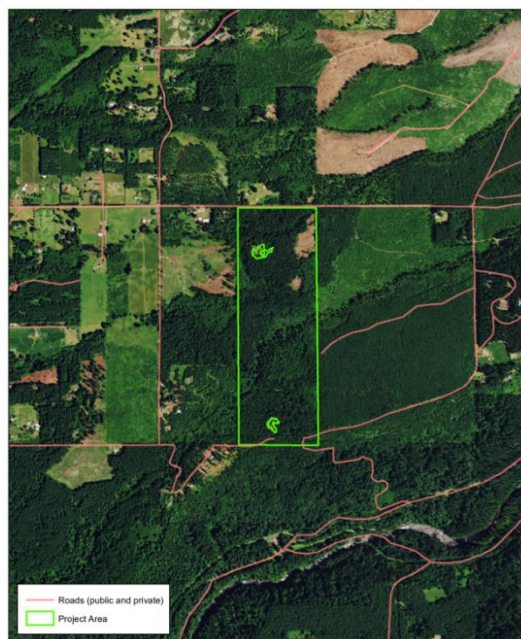

37. Delineation area: 47.67ha

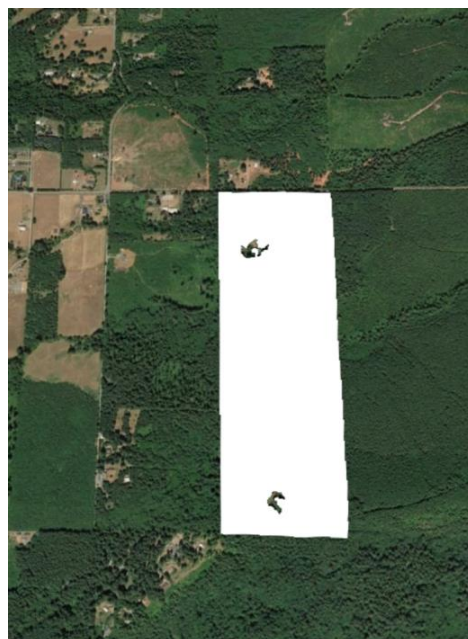

38. PDD claimed area: 46056.50ha

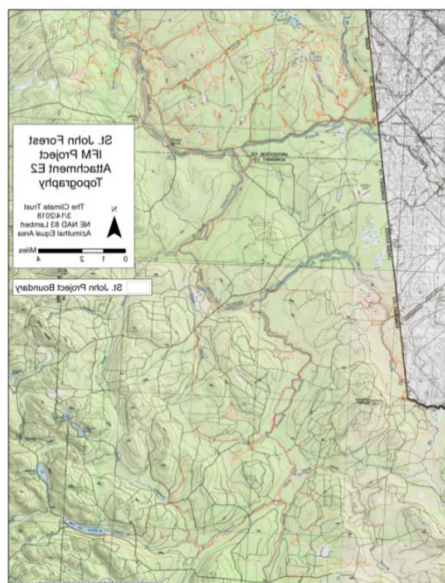

38. Delineation area: 46784.71ha

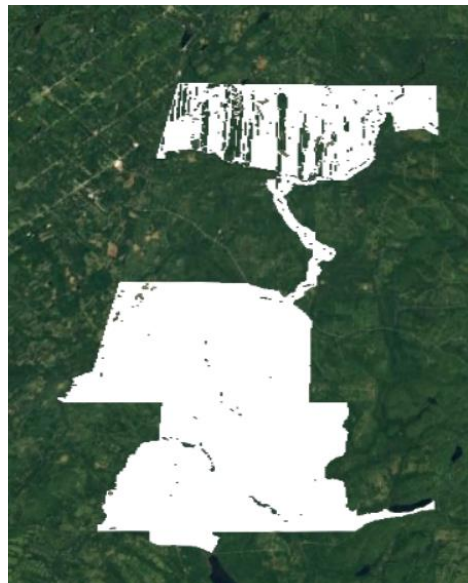

39. PDD claimed area: 5298.44ha

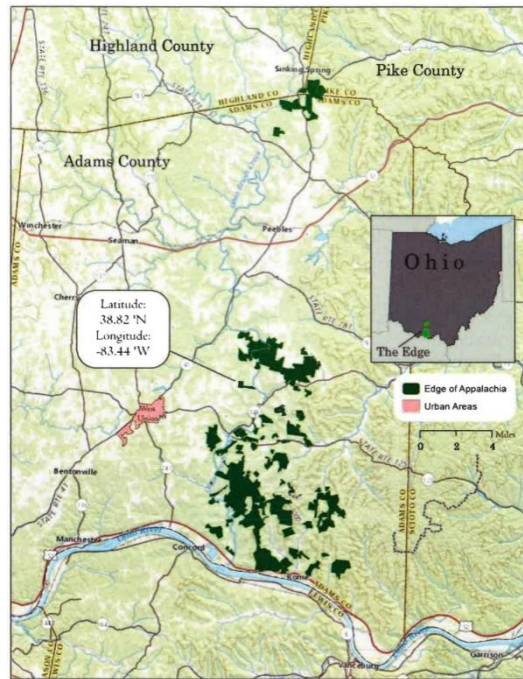

39. Delineation area: 5296.95ha

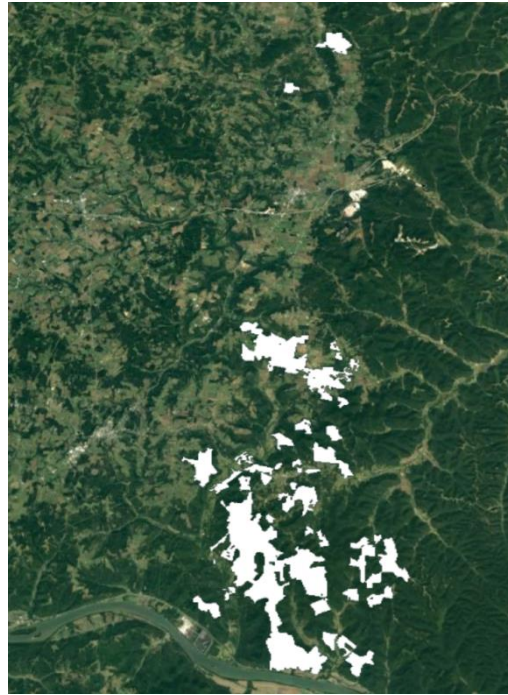

40. PDD claimed area: 92916.40ha

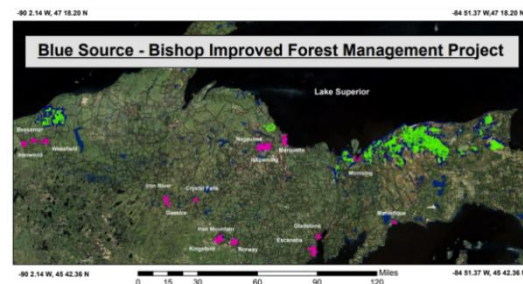

40. Delineation area: 92840.35ha

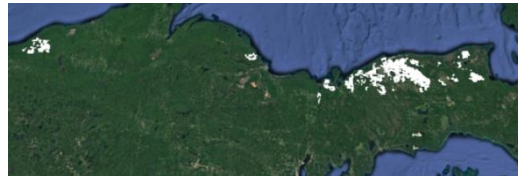

41. PDD claimed area: 3099.89ha

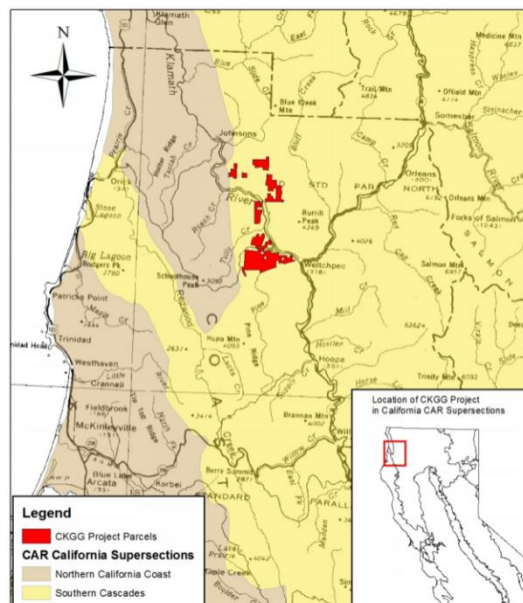

41. Delineation area: 3101.88ha

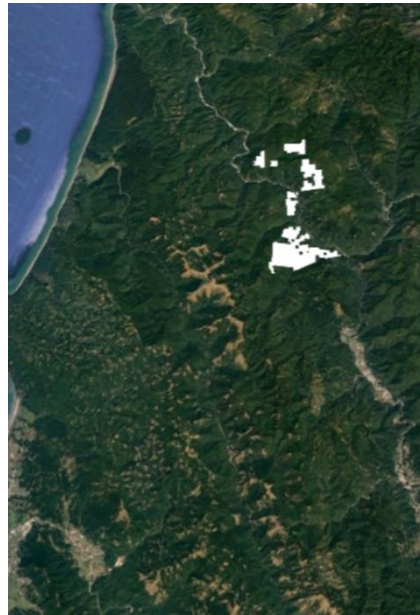

42. PDD claimed area: 7736.88ha

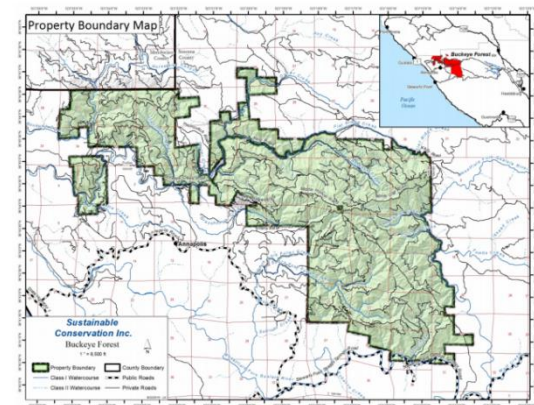

42. Delineation area: 7918.57ha

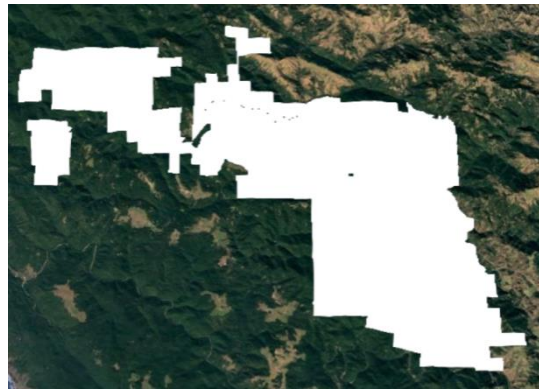

43. PDD claimed area: 3946.89ha

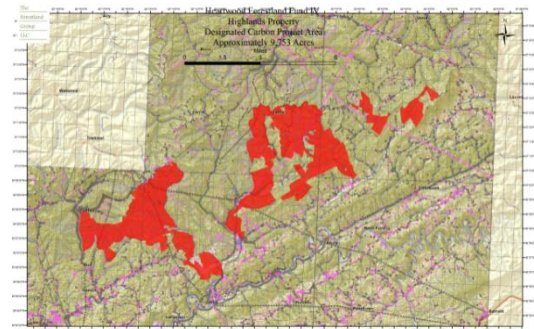

43. Delineation area: 4290.45ha

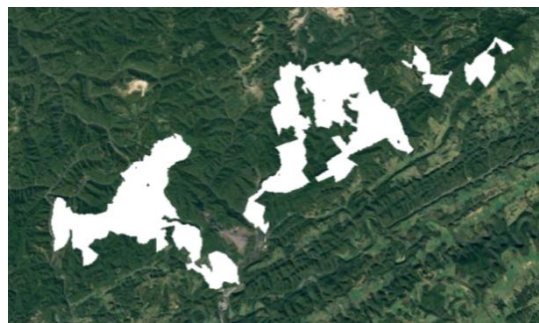

44. PDD claimed area: 7736.88ha

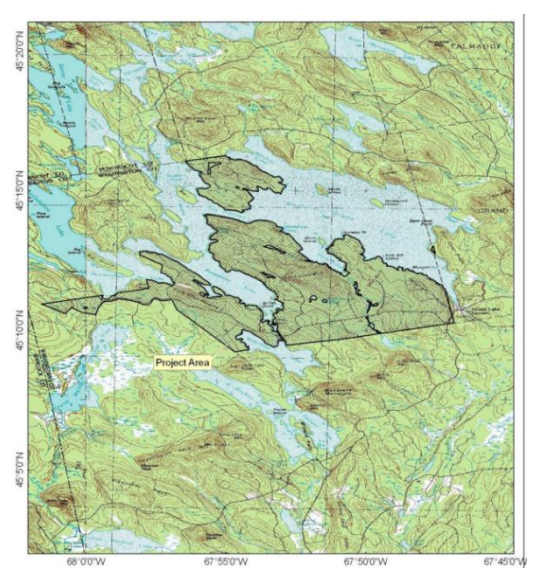

44. Delineation area: 7741.62ha

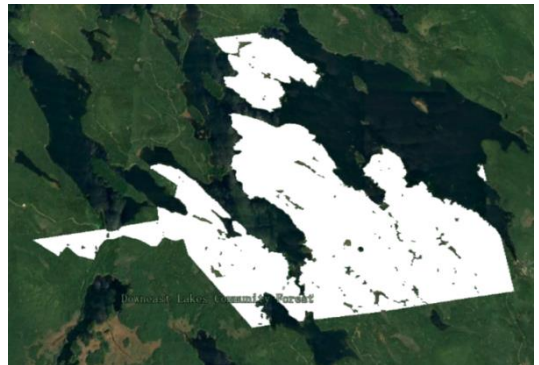

45. PDD claimed area: 6426.37ha

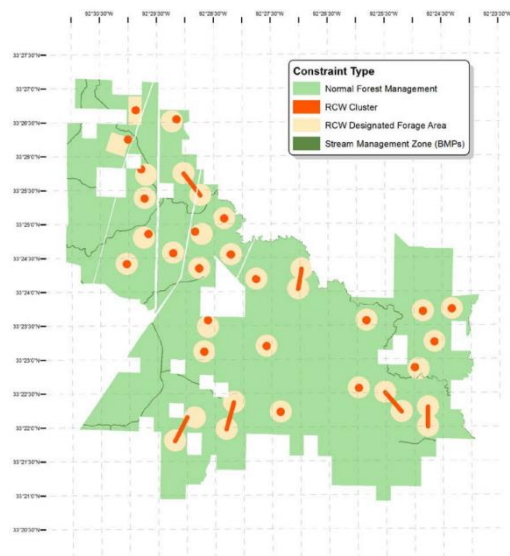

45. Delineation area: 6431.14ha

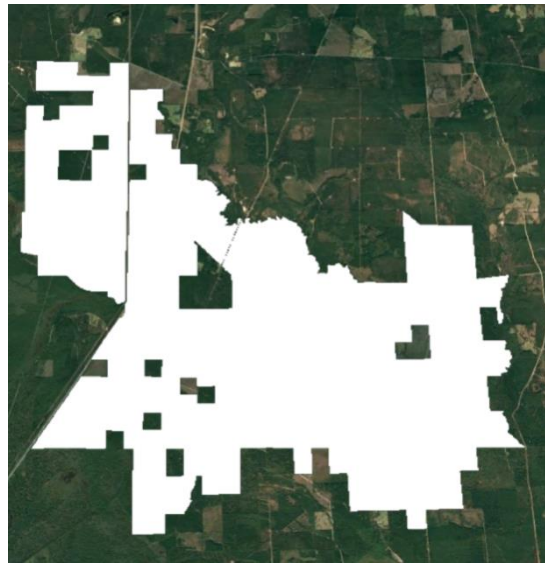

46. PDD claimed area: 46134ha

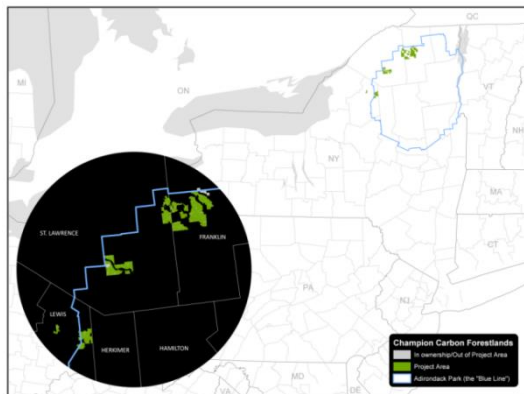

46. Delineation area: 46637.84ha

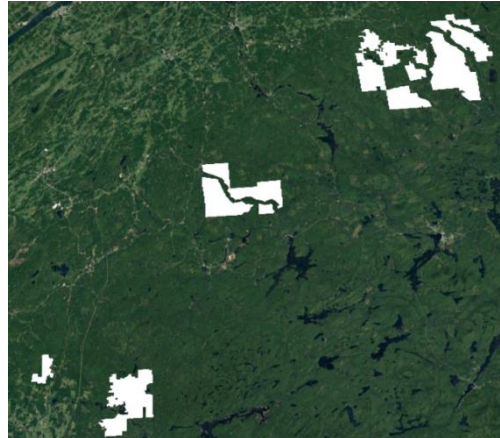

47. PDD claimed area: 210.76ha

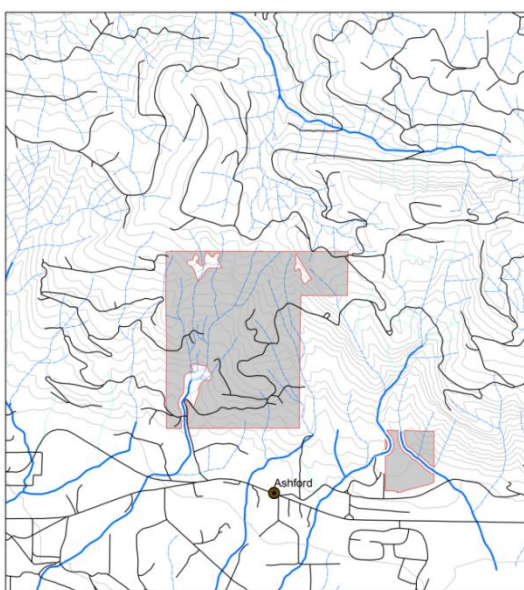

47. Delineation area: 217.30ha

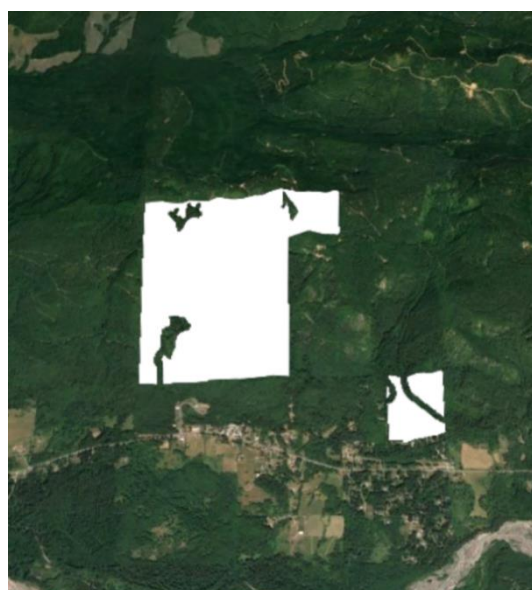

48. PDD claimed area: 6642.04ha

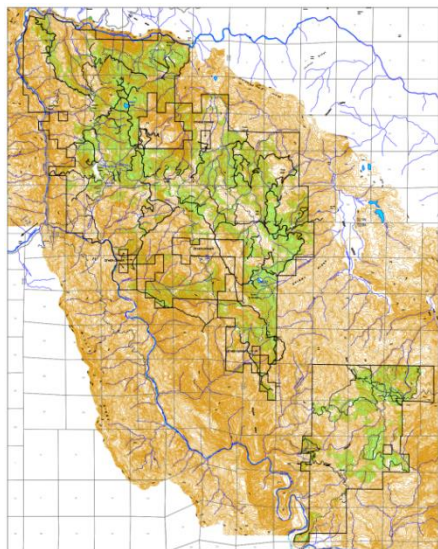

48. Delineation area: 6638.87ha

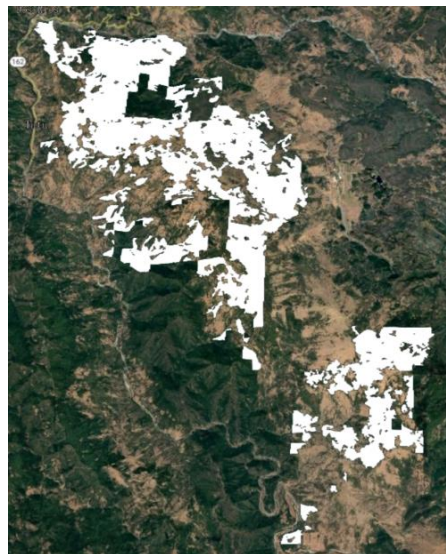

49. PDD claimed area: 9623.42ha

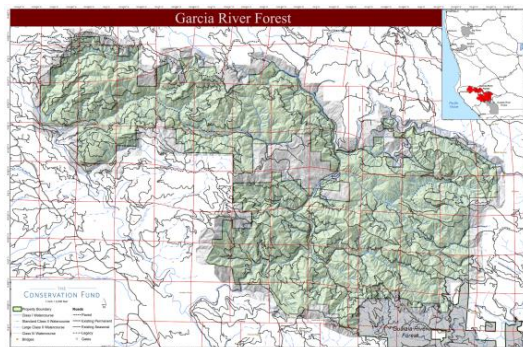

49. Delineation area: 9630.63ha

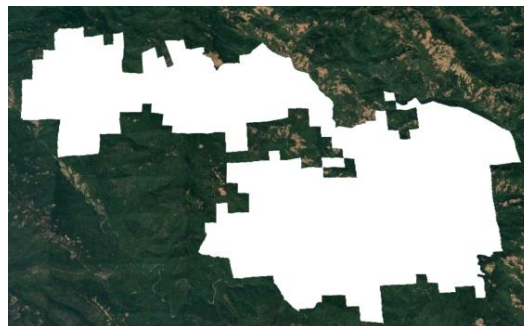

50. PDD claimed area: 5479.44ha

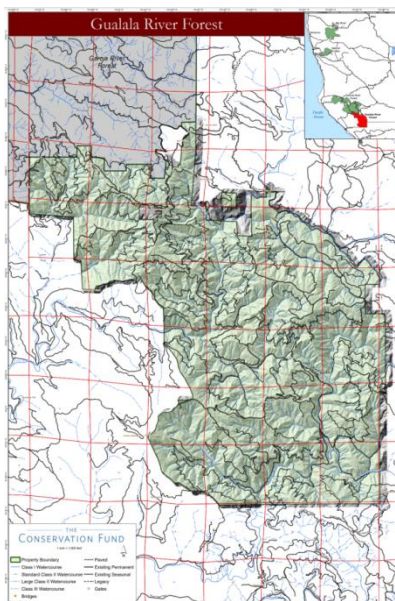

50. Delineation area: 5484.44ha

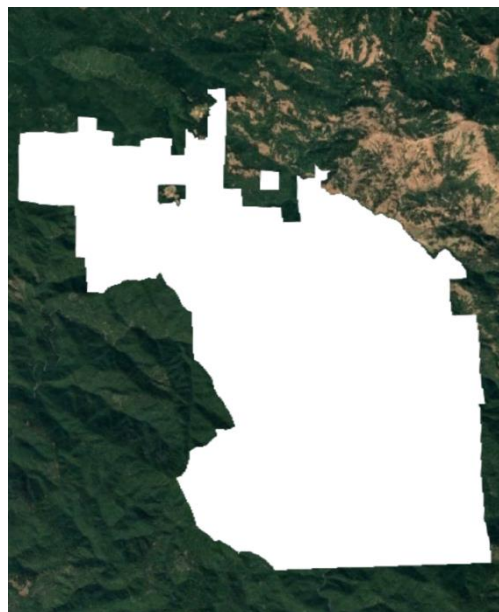

51. PDD claimed area: 6438.95ha

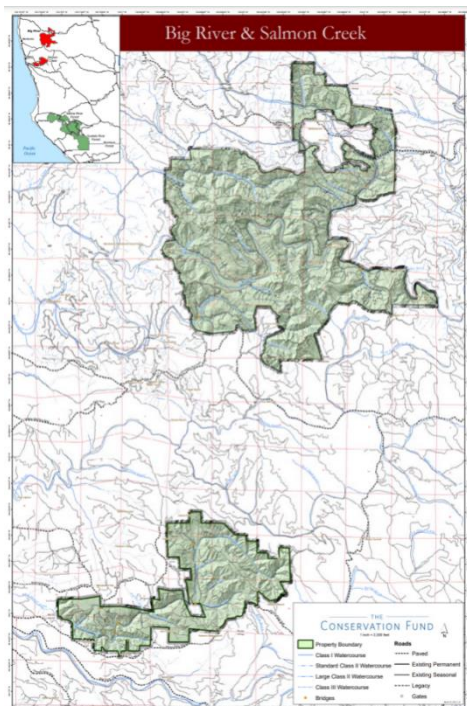

51. Delineation area: 6443.79ha

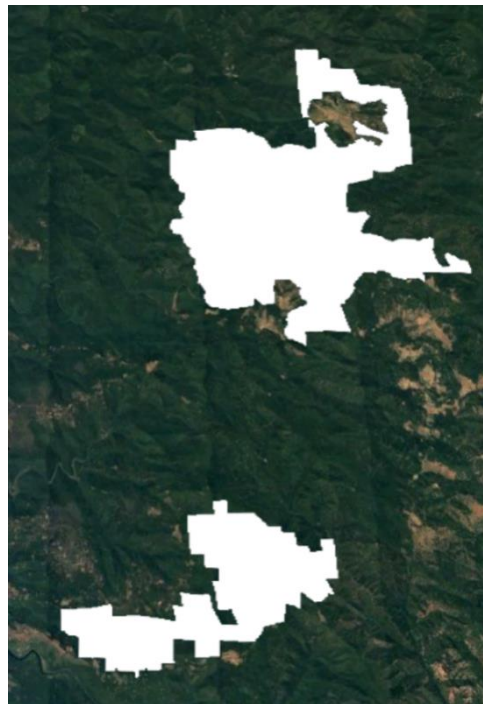

52. PDD claimed area: 1421.98ha

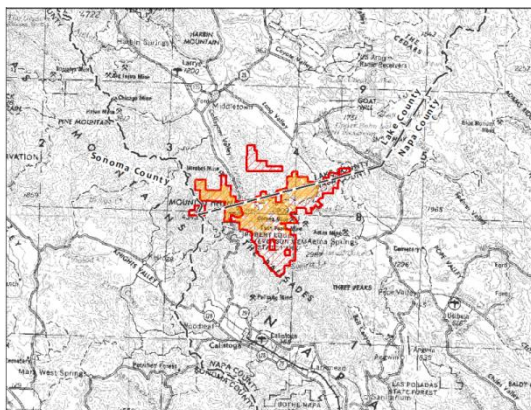

52. Delineation area: 1421.97ha

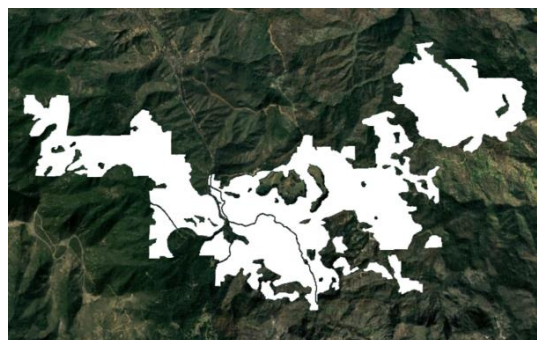

53. PDD claimed area: 917.42ha

53. Delineation area: 861.98ha

|                                                                                                                           |                                                                                                                            |
|---------------------------------------------------------------------------------------------------------------------------|----------------------------------------------------------------------------------------------------------------------------|
| 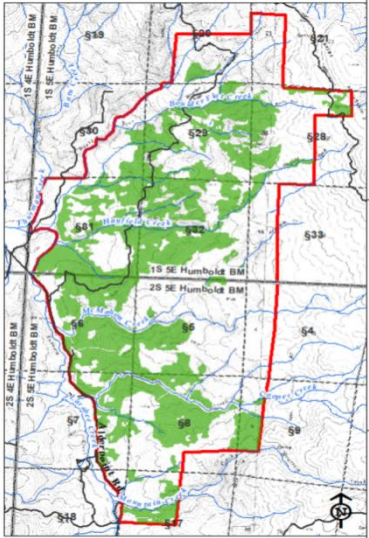                                         |                                          |
| <p>54. PDD claimed area: 1634.53ha</p>  | <p>54. Delineation area: 1636.59ha</p>  |
| <p>55. PDD claimed area: 1967.17ha</p>                                                                                    | <p>55. Delineation area: 2007.24ha</p>                                                                                     |

|                                                                                                                          |                                                                                                                           |
|--------------------------------------------------------------------------------------------------------------------------|---------------------------------------------------------------------------------------------------------------------------|
| 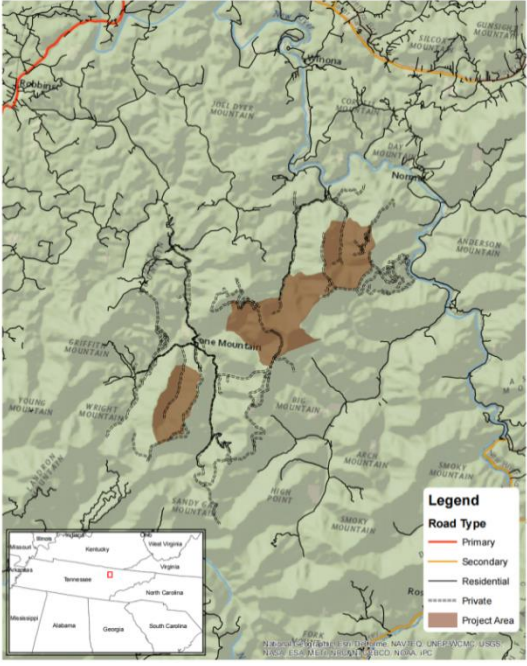                                        |                                         |
| <p>56. PDD claimed area: 876.95ha</p>  | <p>56. Delineation area: 876.31ha</p>  |
| <p>57. PDD claimed area: 4487.96ha</p>                                                                                   | <p>57. Delineation area: 4713.21ha</p>                                                                                    |

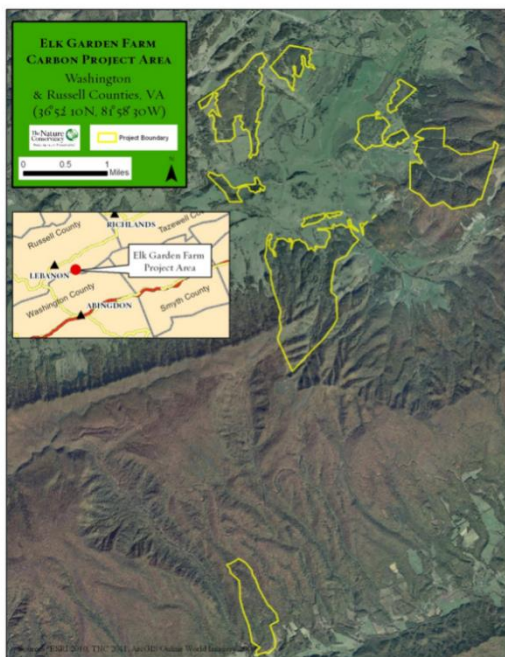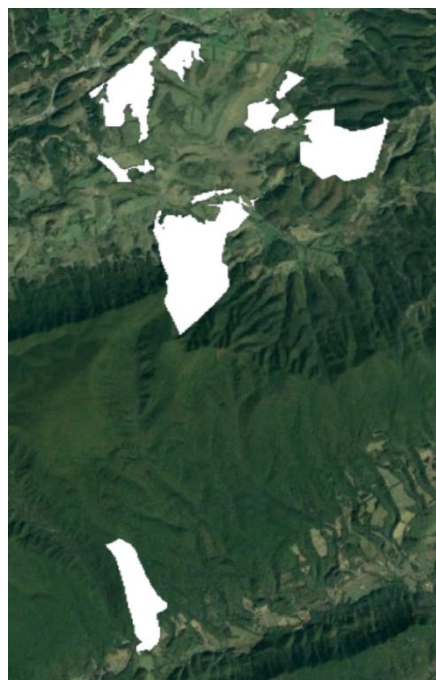

58. PDD claimed area: 2326.94ha

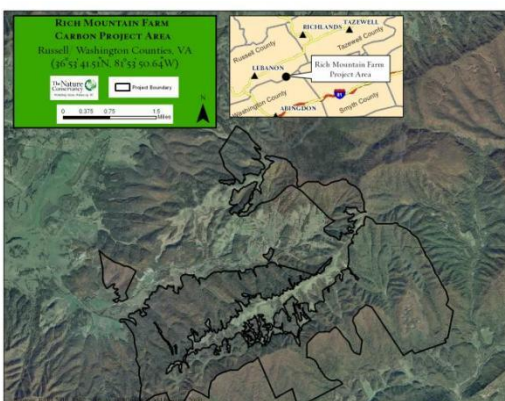

58. Delineation area: 2325.90ha

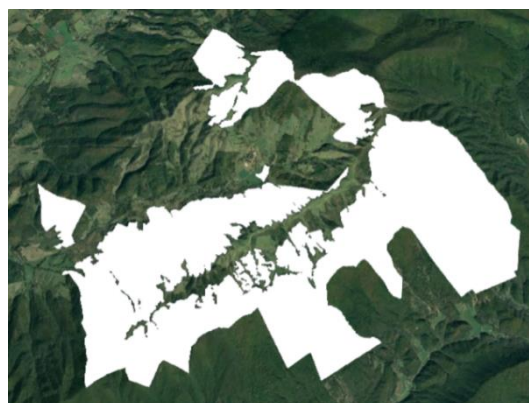

59. PDD claimed area: 3099.48ha

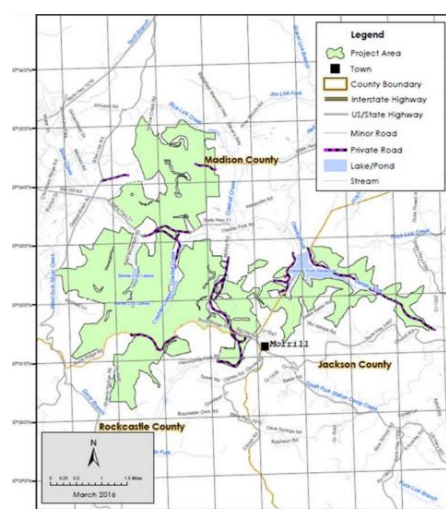

59. Delineation area: 3099.97ha

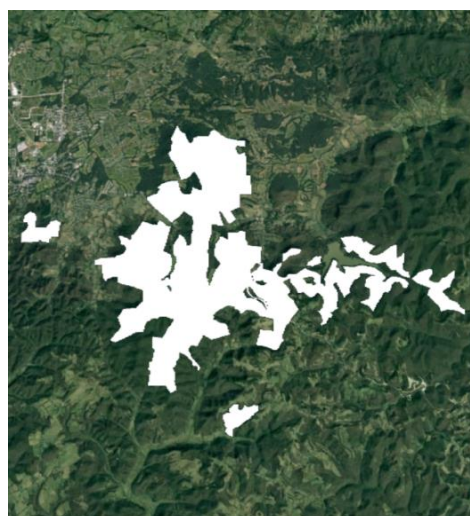

60. PDD claimed area: 925.11ha

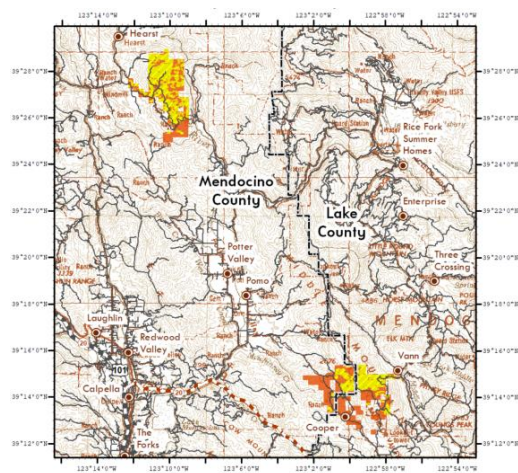

60. Delineation area: 1015.85ha

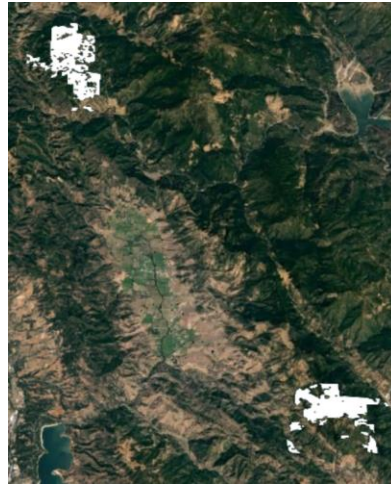

61. PDD claimed area: 39874.3ha

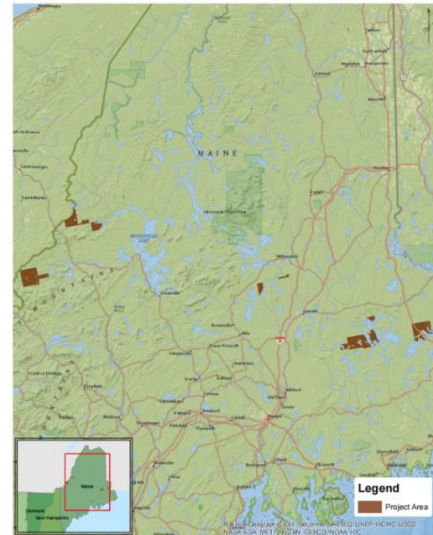

61. Delineation area: 42567.88ha

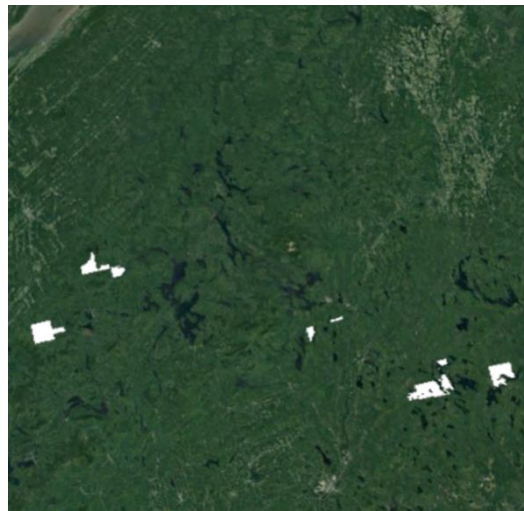

62. PDD claimed area: 5002.18ha

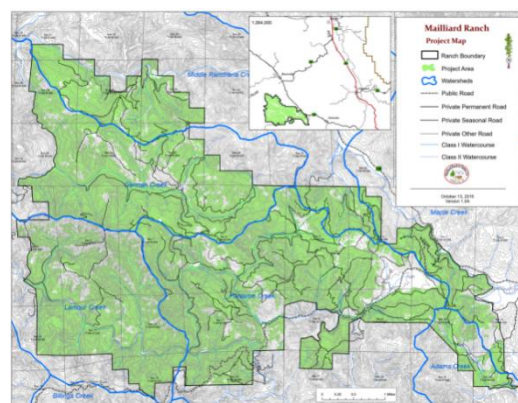

62. Delineation area: 5006.07ha

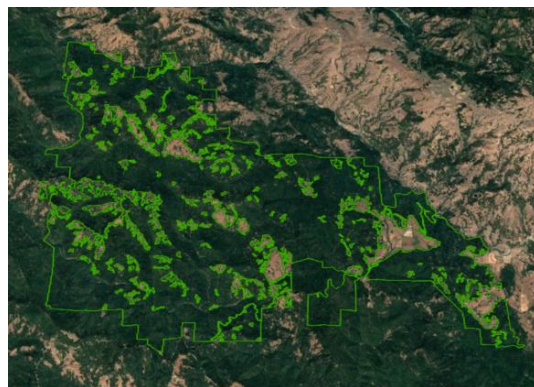

63. PDD claimed area: 92420.30ha

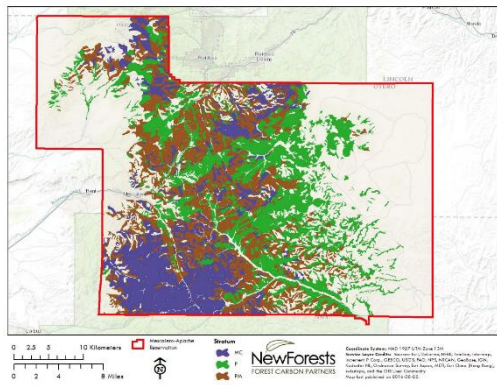

63. Delineation area: 95726.99ha

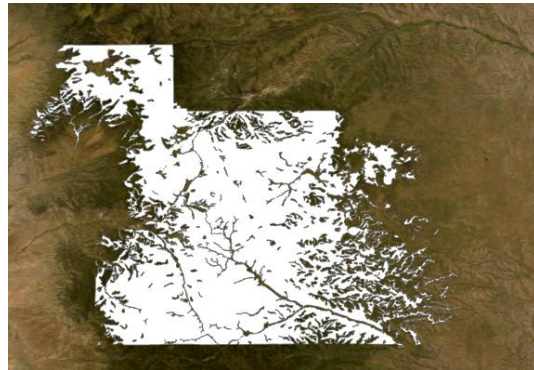

64. PDD claimed area: 8214.71ha

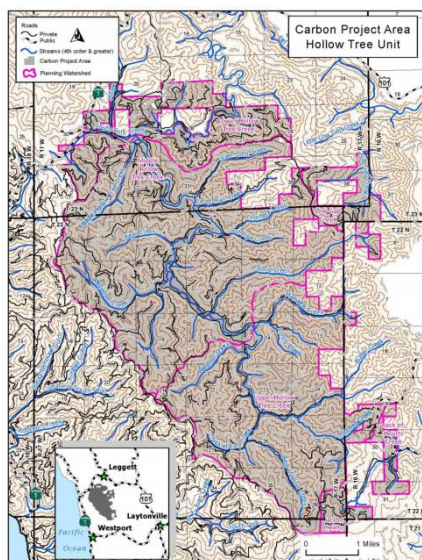

64. Delineation area: 8215.25ha

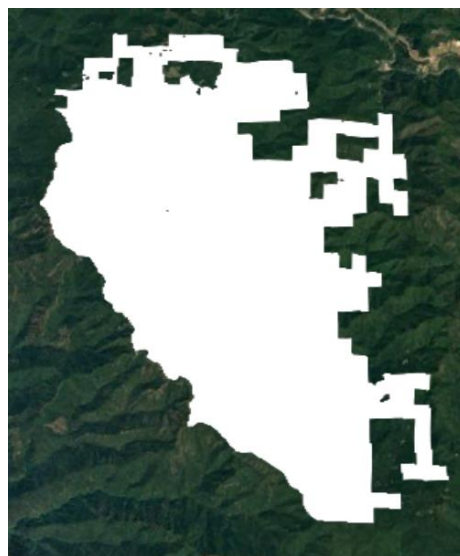

65. PDD claimed area: 33546.90ha

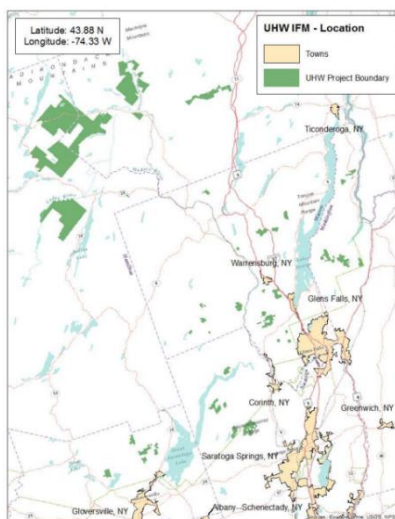

65. Delineation area: 35698.91ha

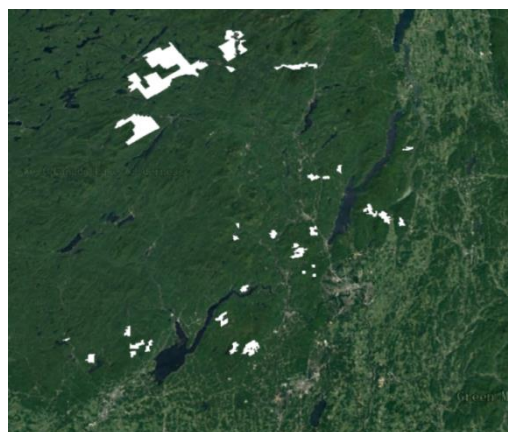

66. PDD claimed area: 10347.40ha

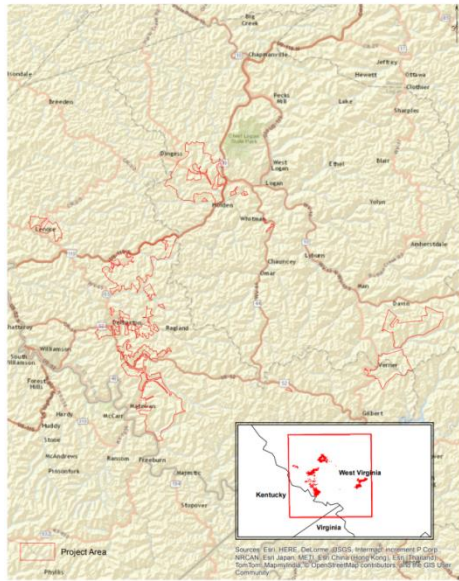

66. Delineation area: 11177.41ha

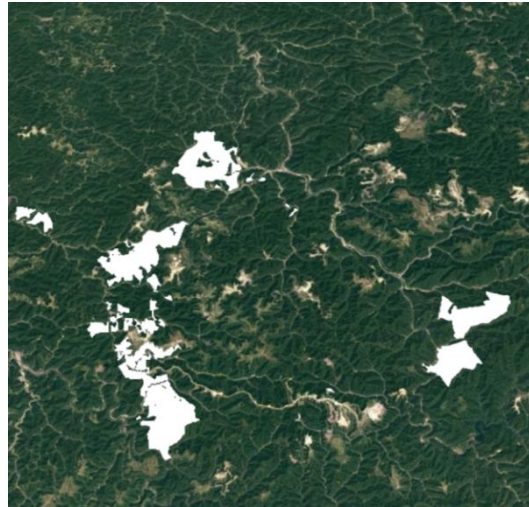

67. PDD claimed area: 15630.60ha

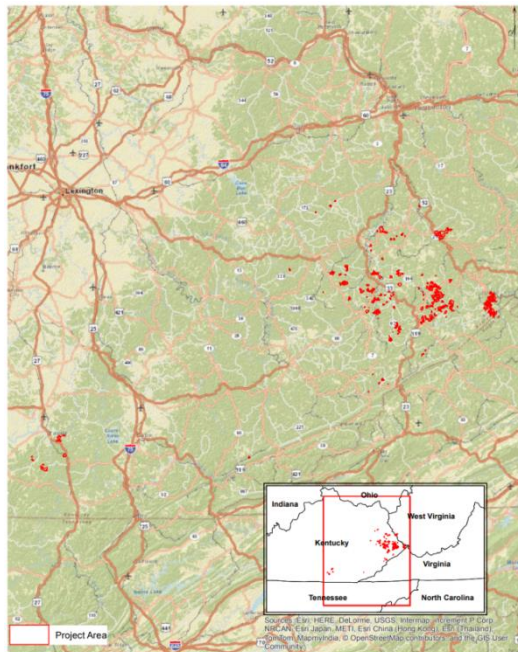

67. Delineation area: 15632.03ha

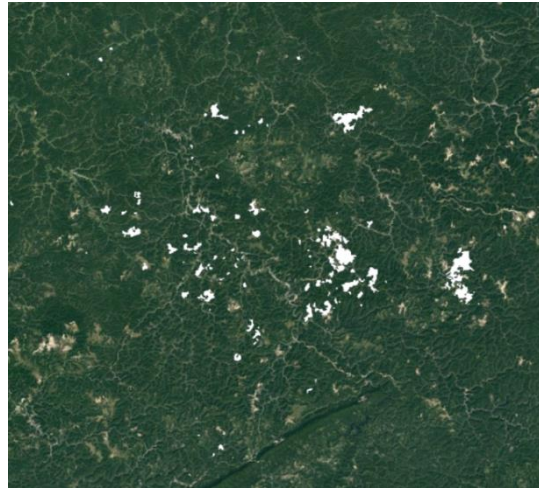

68. PDD claimed area: 5483.00ha

68. Delineation area: 5486.04ha

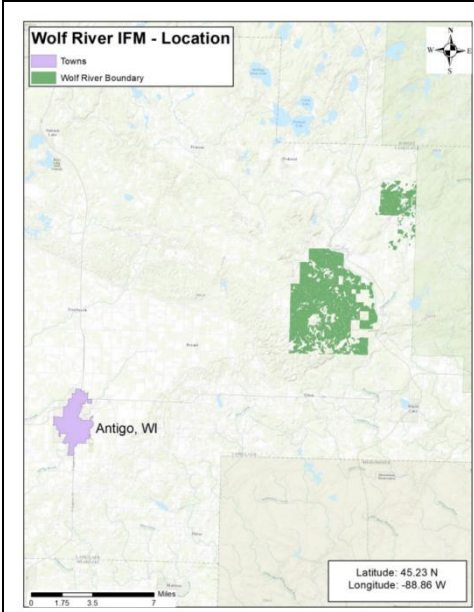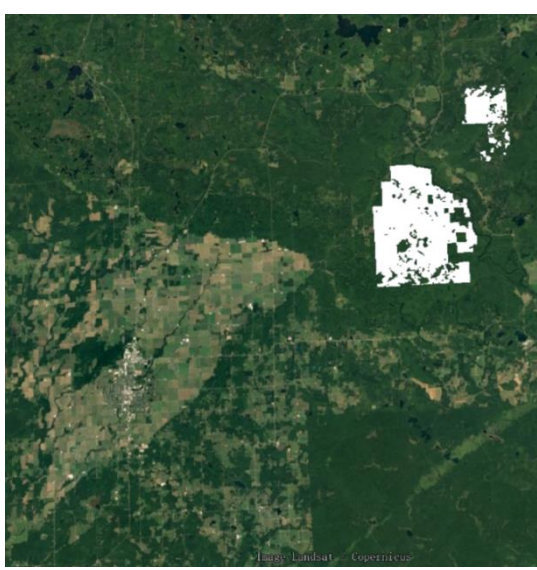

69. PDD claimed area: 27545.20ha

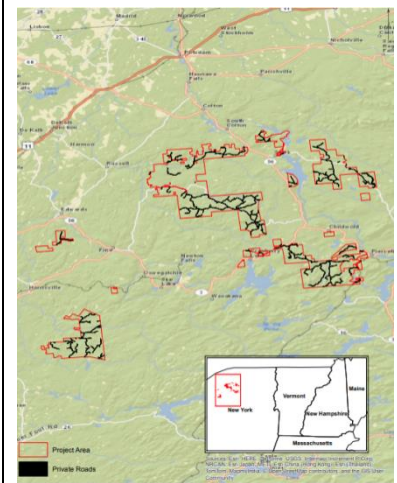

69. Delineation area: 28278.99ha

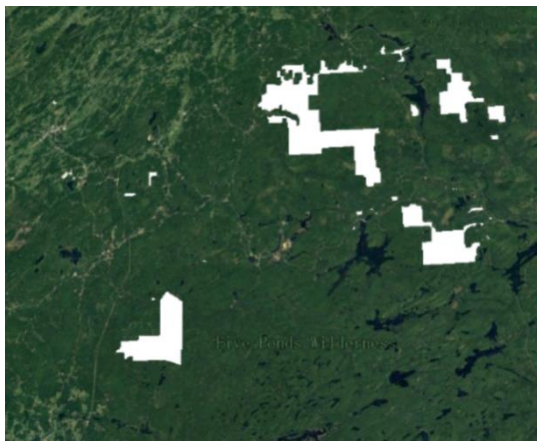

70. PDD claimed area: 32944.7ha

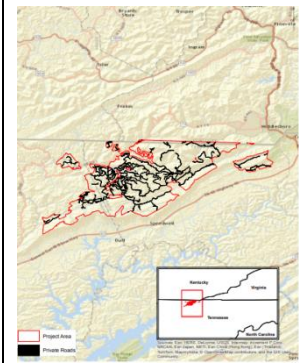

70. Delineation area: 32443.57ha

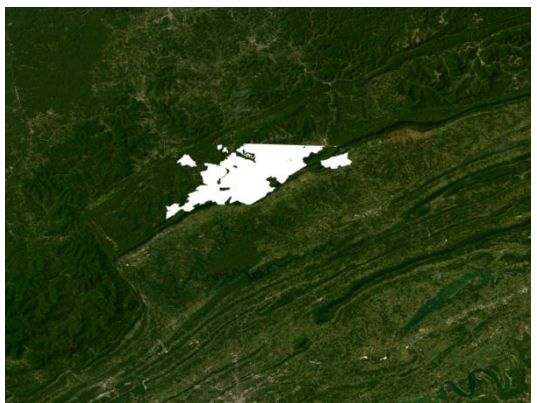

71. PDD claimed area: 7912.41ha

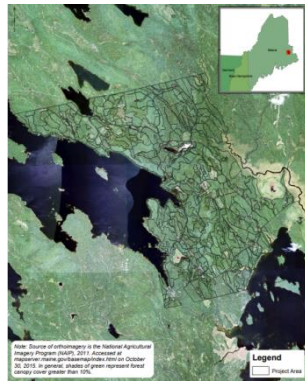

71. Delineation area: 7945.00ha

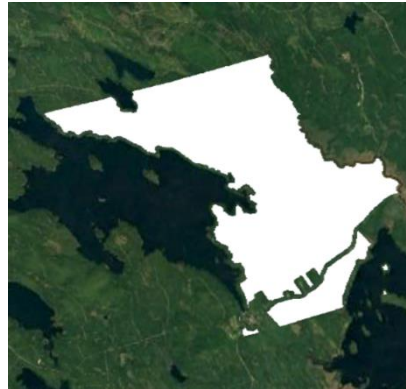

72. PDD claimed area: 17685.71ha

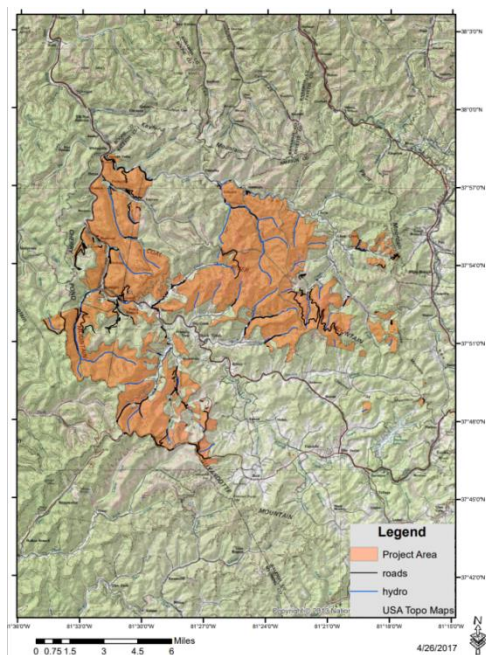

72. Delineation area: 14363.19ha

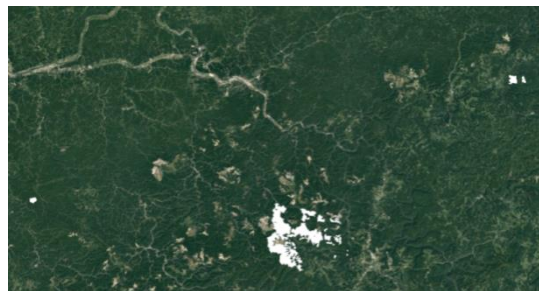

73. PDD claimed area: 935.23ha

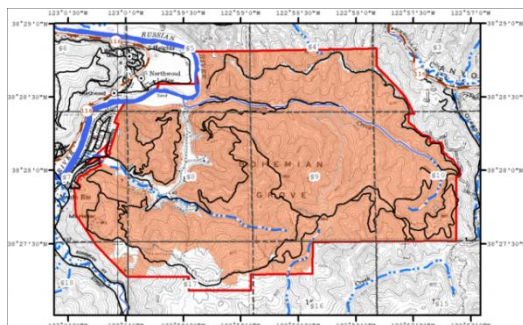

73. Delineation area: 936.02ha

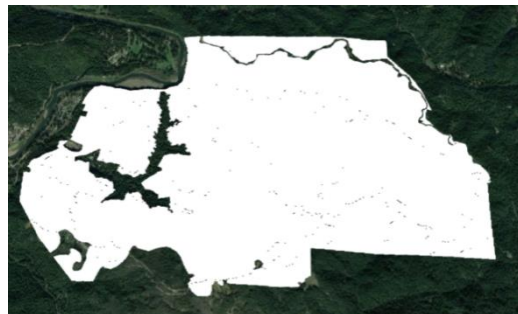

74. PDD claimed area: 4000ha

The figure consists of three maps of Cangwu County, Guangdong, showing land use and forest cover. Each map includes a legend for land use types and administrative boundaries.

**Top Map: Cangwu county, Longxu town, Xindi town**

**Legend:**

- Coniferous
- Broadleaves
- Needle and broadleaf mixed forest land
- Other forest land
- Barren land
- Others land
- Water
- Project boundary

**Legend:**

- Township government village
- Province boundary
- County boundary
- Township boundary
- Road
- River

**Middle Map: Shichuan village, Shatou town**

**Legend:**

- Coniferous
- Broadleaves
- Needle and broadleaf mixed forest land
- Other forest land
- Barren land
- Others land
- Water
- Project boundary

**Legend:**

- Township government village
- Province boundary
- County boundary
- Township boundary
- Road
- River

**Bottom Map: Shuangmen village, Minglun town**

**Legend:**

- Coniferous
- Broadleaves
- Needle and broadleaf mixed forest land
- Other forest land
- Barren land
- Others land
- Water
- Project boundary

**Legend:**

- County government
- Township government
- Village
- County boundary
- Township boundary
- Railway
- Road
- River

|                                                                                                                            |                                                                                                                                   |
|----------------------------------------------------------------------------------------------------------------------------|-----------------------------------------------------------------------------------------------------------------------------------|
| 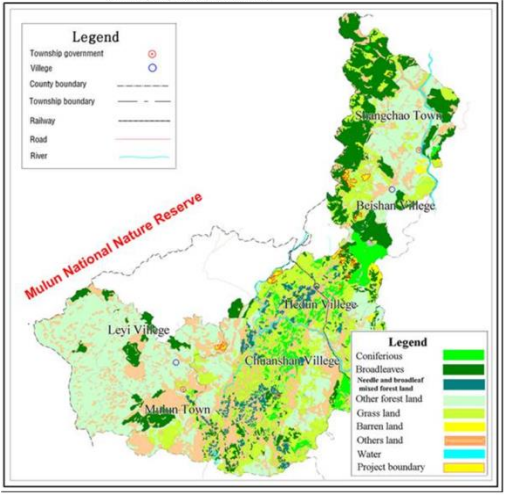                                          |                                                 |
| <p>75. PDD claimed area: 341.9ha</p>     | <p>75. Manual delineation area: 340.79 ha</p>  |
| <p>76. PDD claimed area: 11711.4ha</p>  | <p>76. Delineation area: 11744.89ha</p>       |

77. PDD claimed area: 2728.00ha

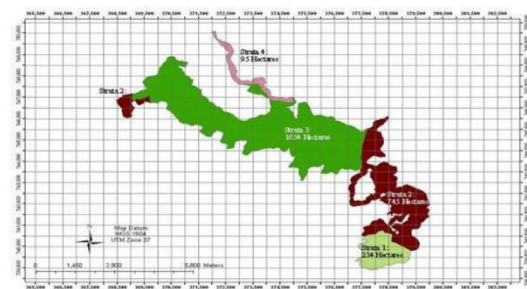

77. Delineation area: 2729.99 ha

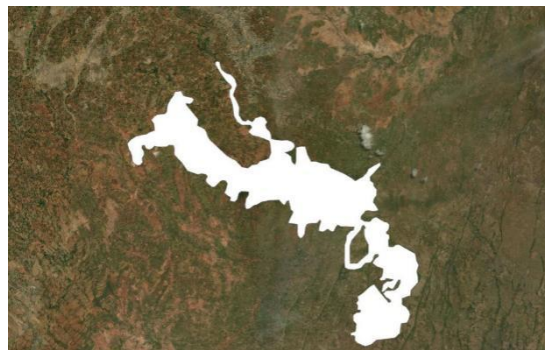

78. PDD claimed area: 6272.36ha

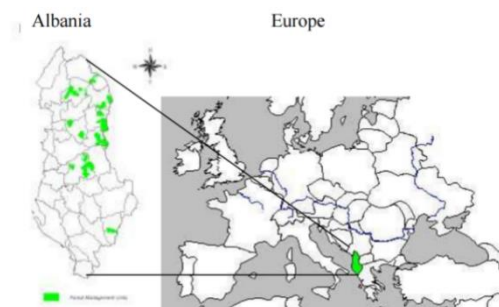

78. Delineation area: 6382.22ha

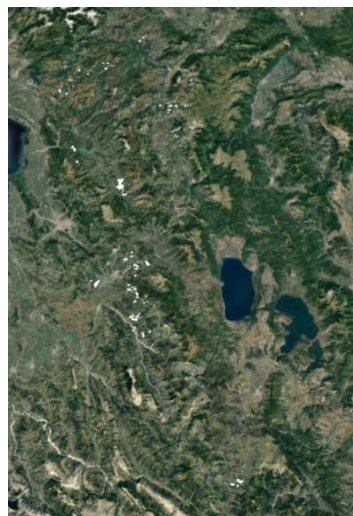

79. PDD claimed area: 8671.3ha

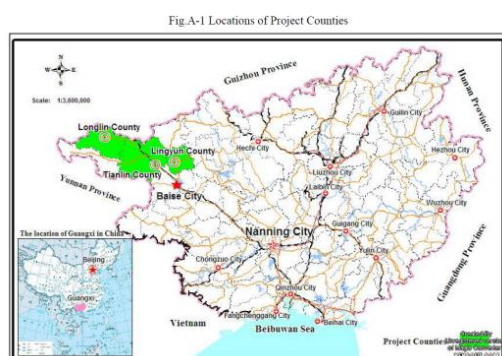

79. Delineation area: 8671.28ha

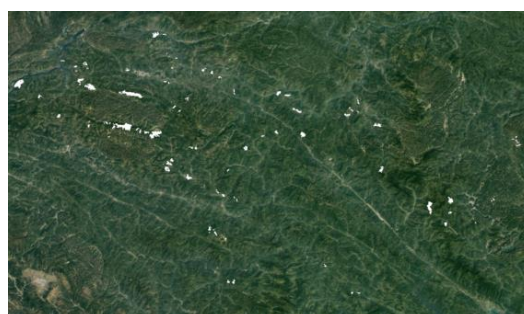

80. PDD claimed area: 813ha

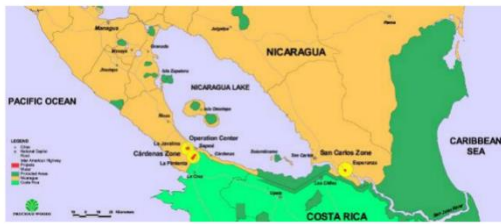

80. Delineation area: 838.39ha

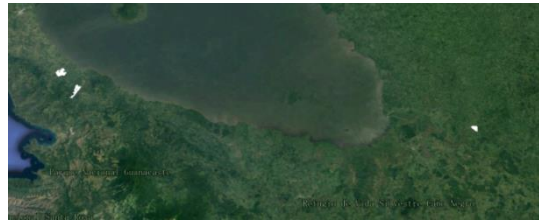

81. PDD claimed area: 2292ha

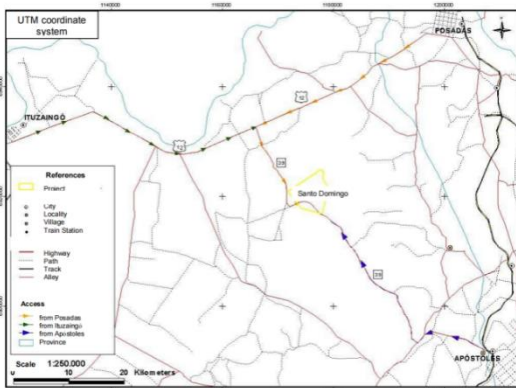

81. Manual delineation area: 2288.10ha

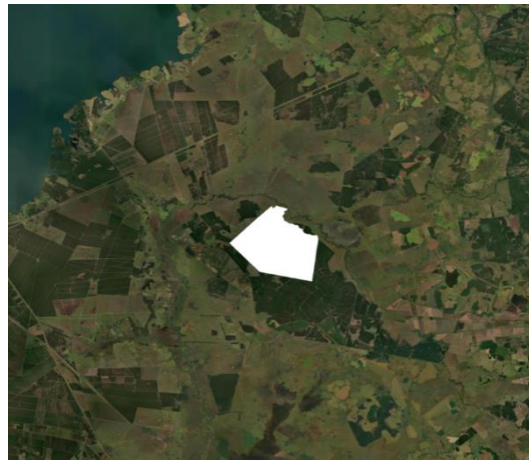

82. PDD claimed area: 4003.06ha

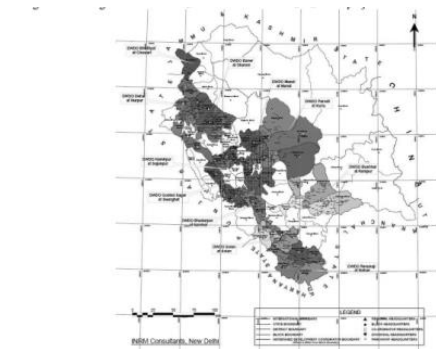

82. Delineation area: 4003.08ha

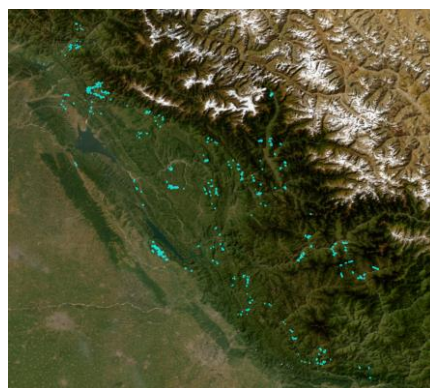

83. PDD claimed area: 4129.70ha

83. Manual delineation area: 4114.22ha

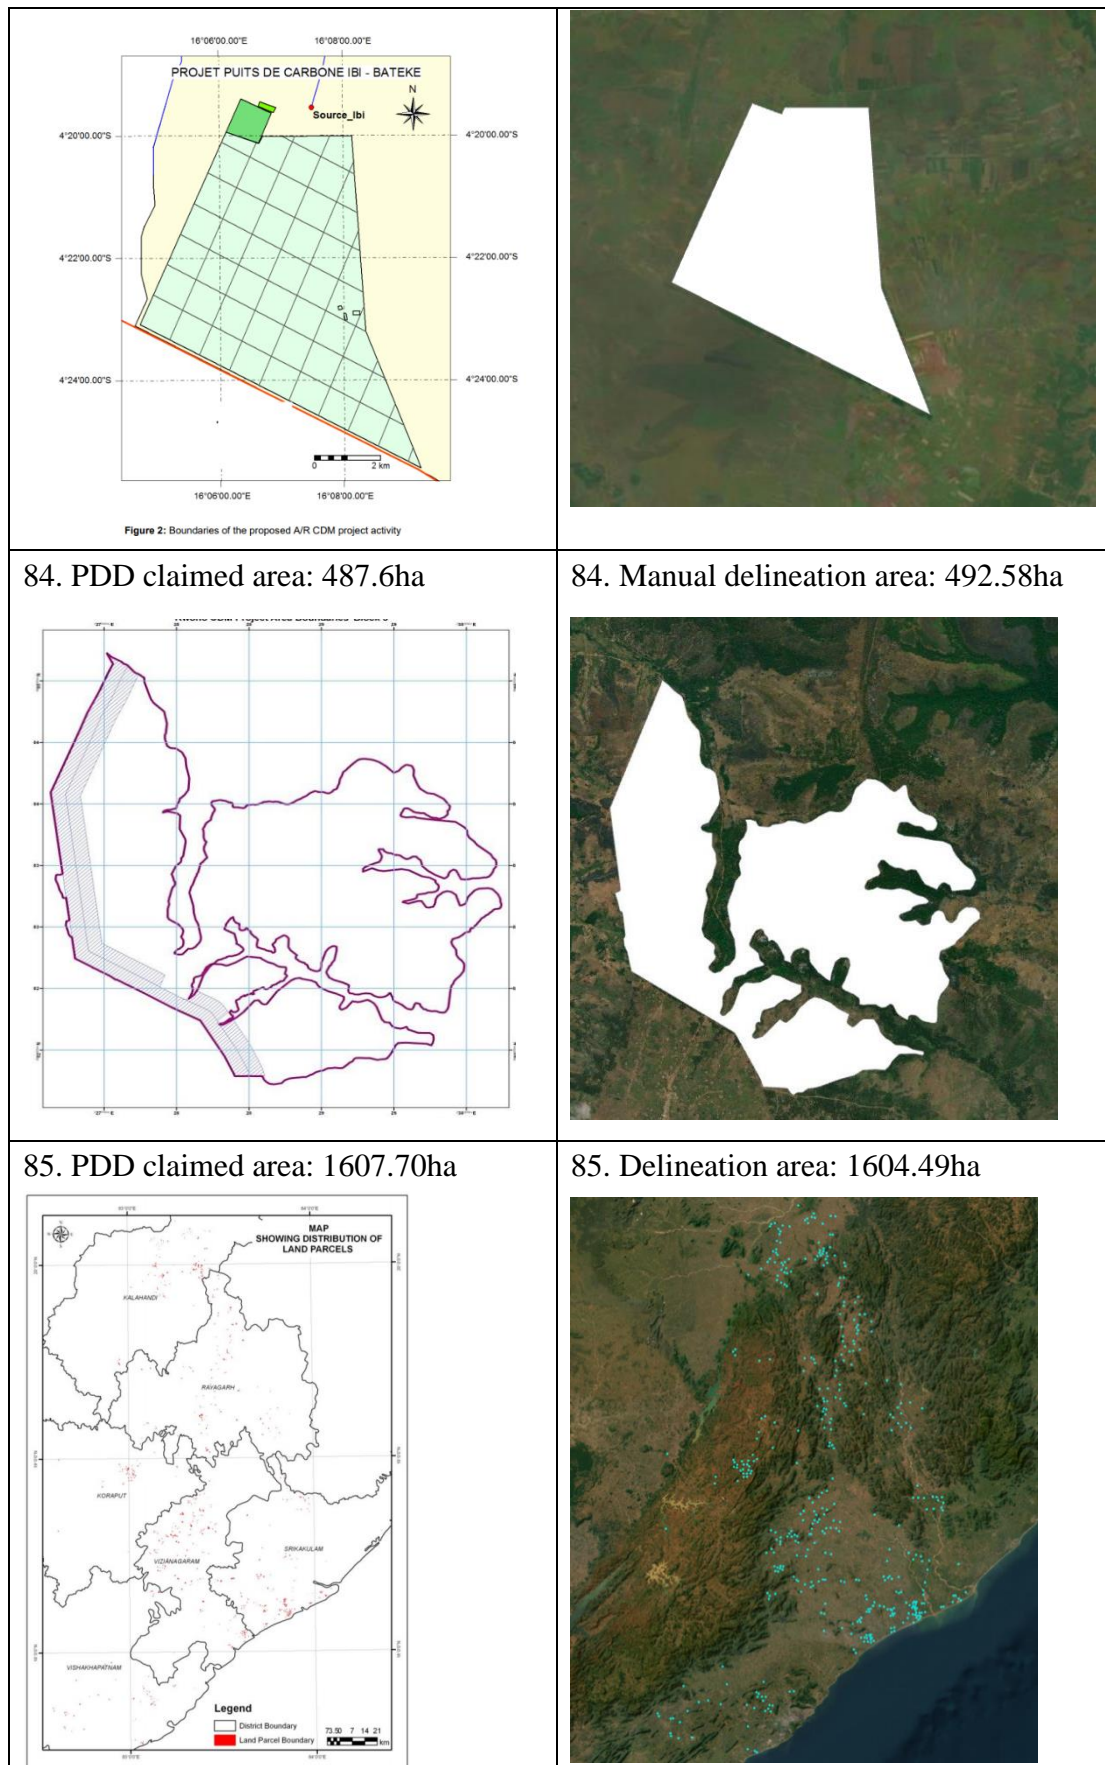

86. PDD claimed area: 2098.90ha

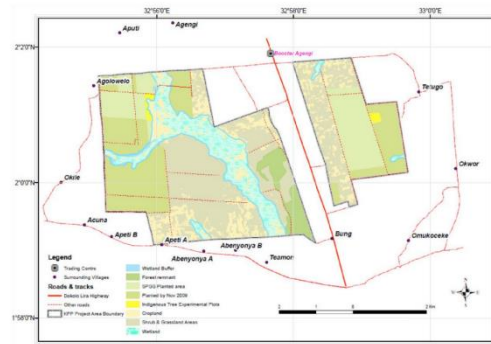

86. Delineation area: 2100.70ha

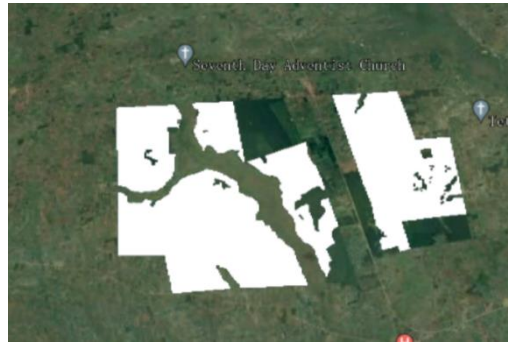

87. PDD claimed area: 4373.00ha

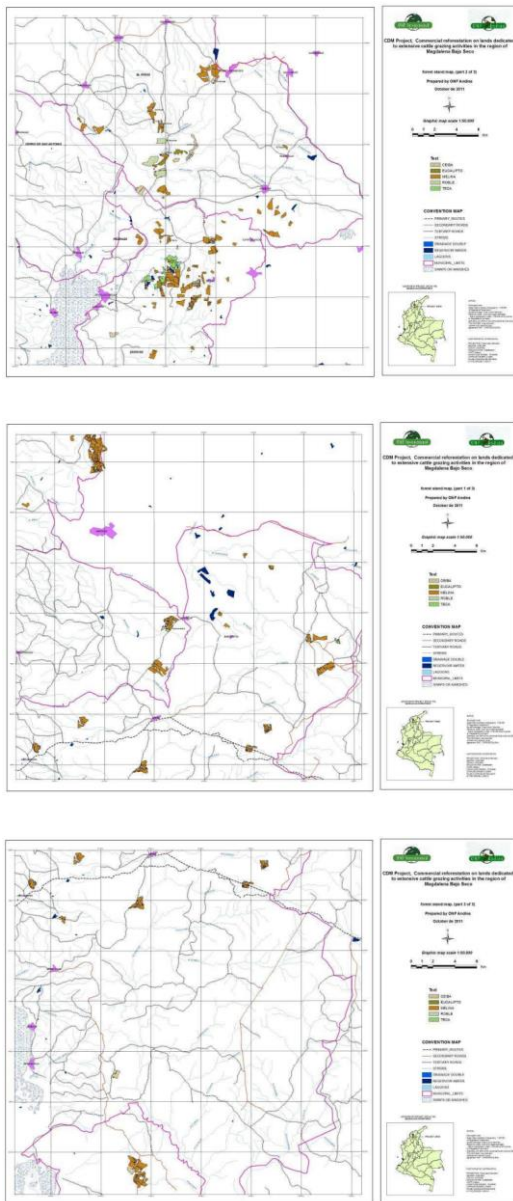

87. Delineation area: 4376.29ha

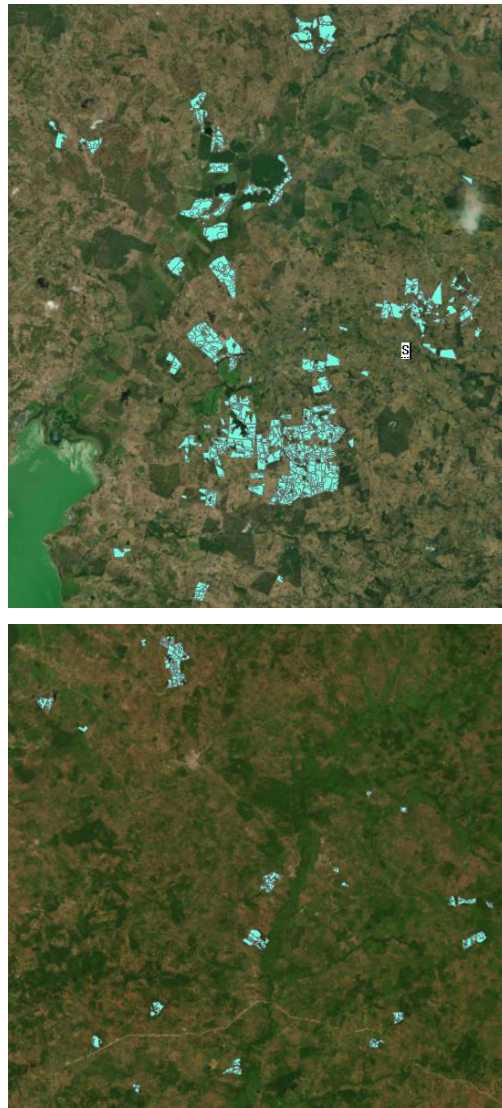

88. PDD claimed area: 370ha

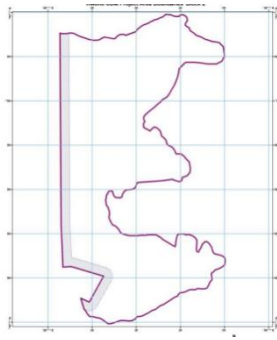

88. Manual delineation area: 371.01ha

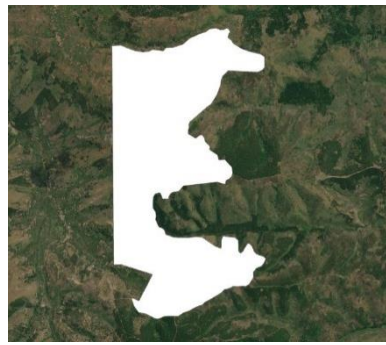

89. PDD claimed area: 468ha

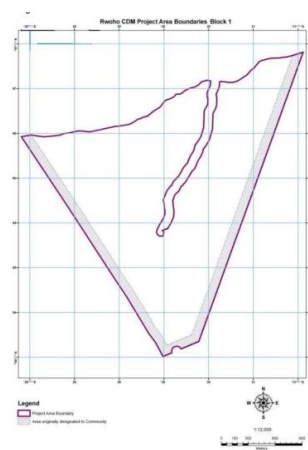

89. Manual delineation area: 467.78ha

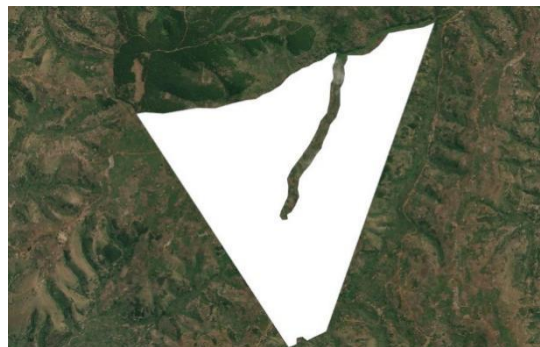

90. PDD claimed area: 347.10ha

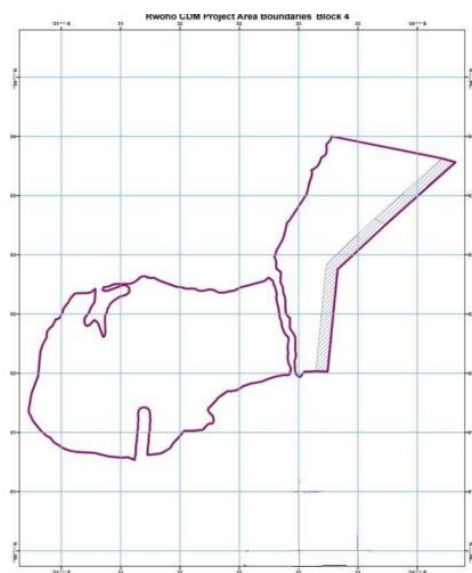

90. Manual delineation area: 349.17ha

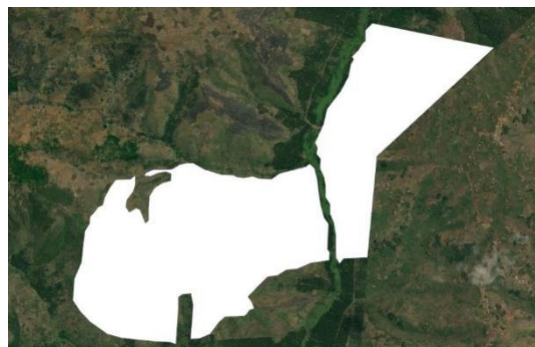

91. PDD claimed area: 8468.84ha

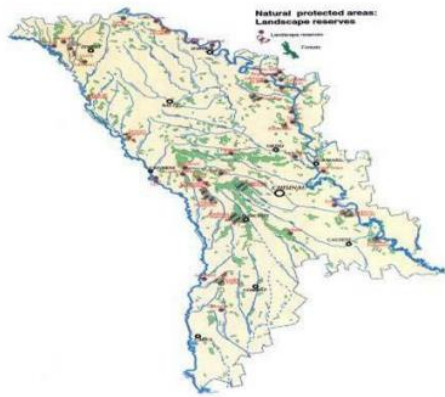

91. Delineation area: 8469.44ha

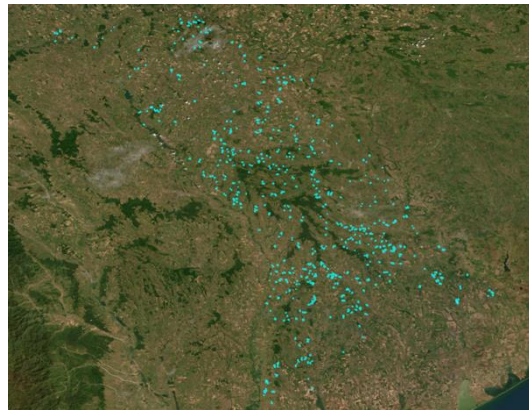

92. PDD claimed area: 29019ha

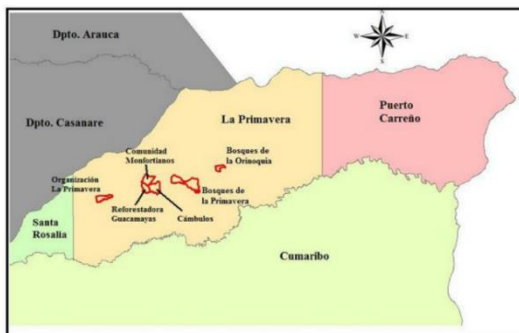

92. Manual delineation area: 29039.49ha

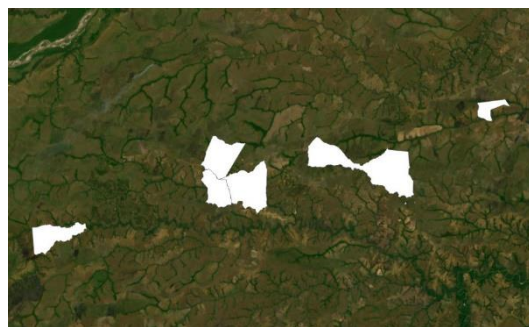

93. PDD claimed area: 8472ha

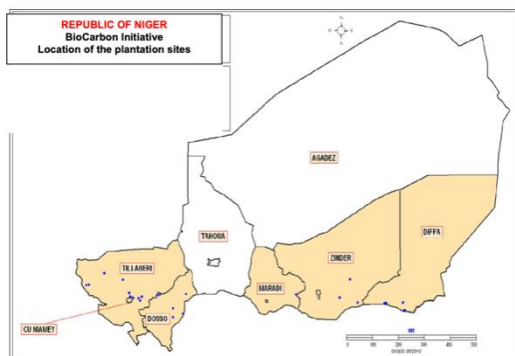

93. Manual delineation area: 8446.04ha

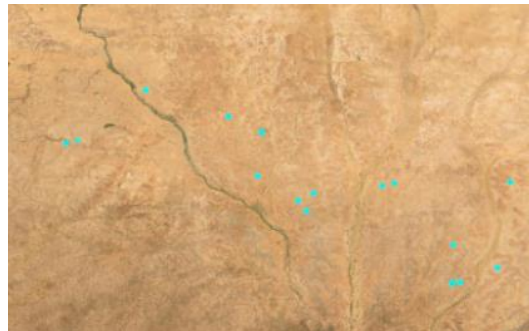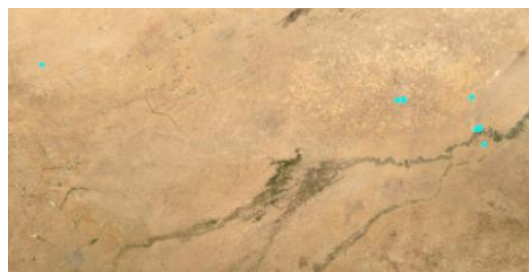

94. PDD claimed area: 506.63ha

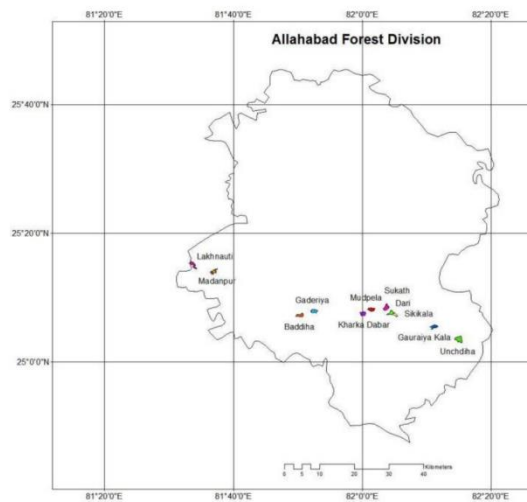

94. Delineation area: 506.18ha

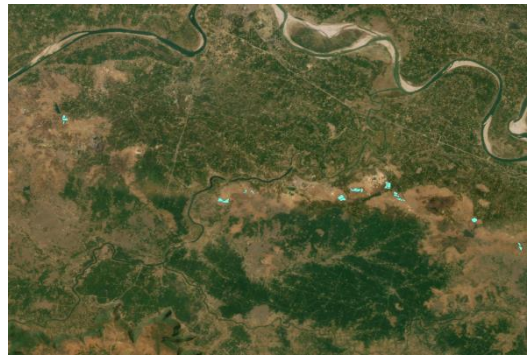

95. PDD claimed area: 326.72ha

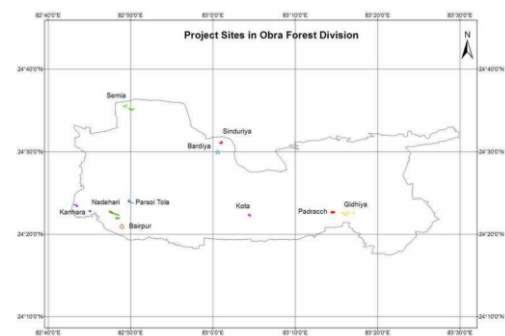

95. Delineation area: 325.77ha

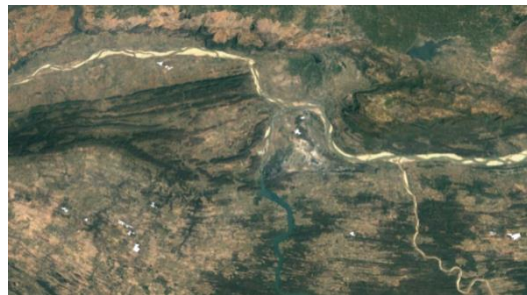

96. PDD claimed area: 268.87ha

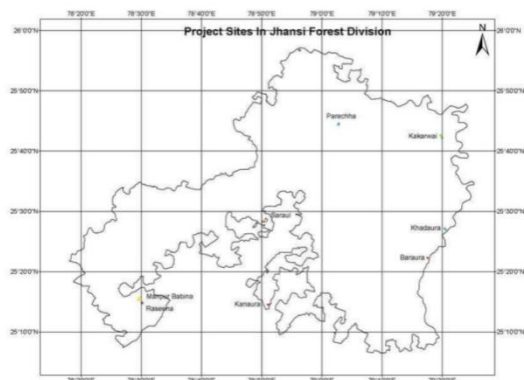

96. Delineation area: 269.88ha

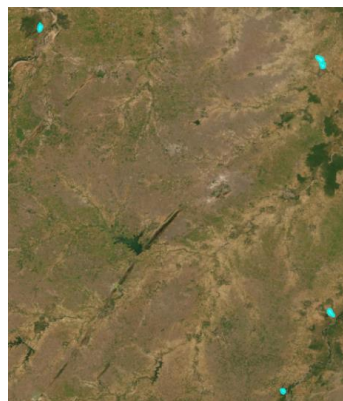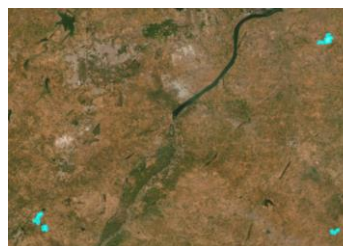

97. PDD claimed area: 12121ha

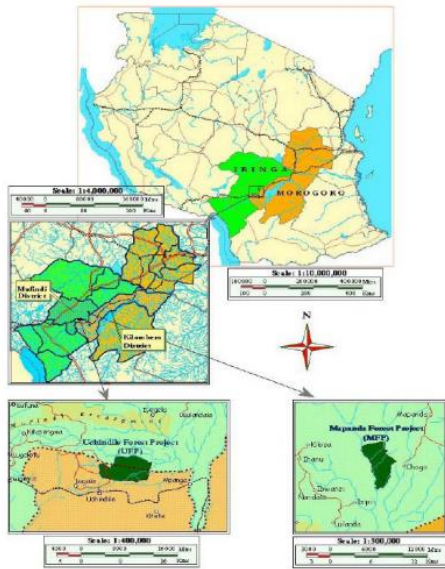

97. Manual delineation area: 12000.32ha

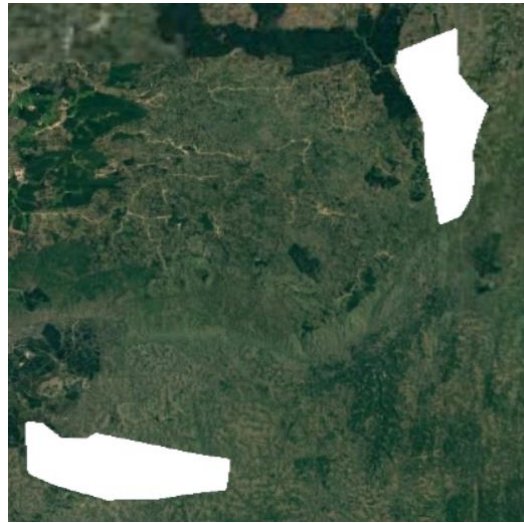

98. PDD claimed area: 2366.16ha

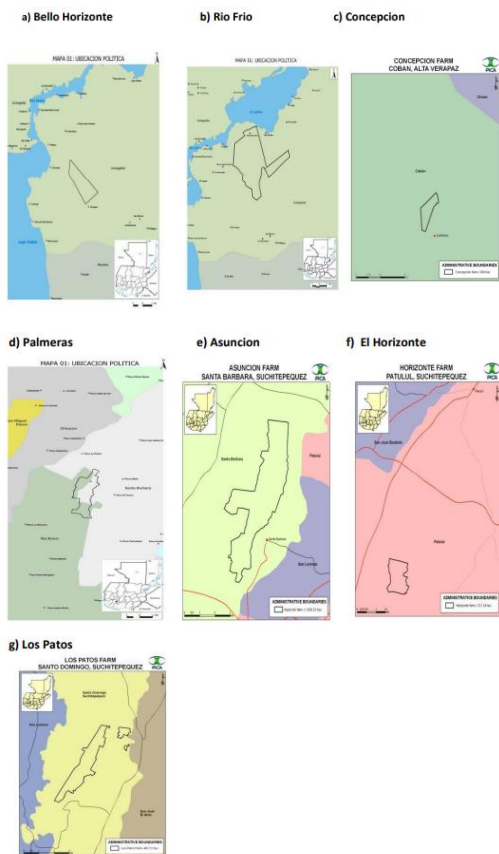

98. Manual delineation area: 2368.86ha

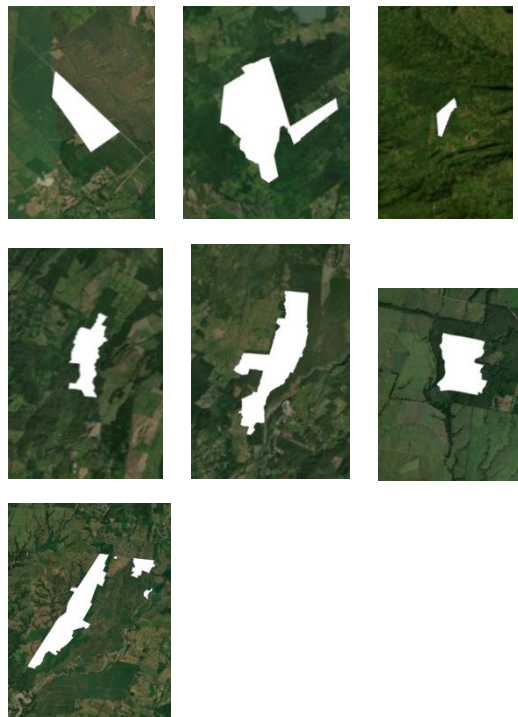

99. PDD claimed area: 11000ha

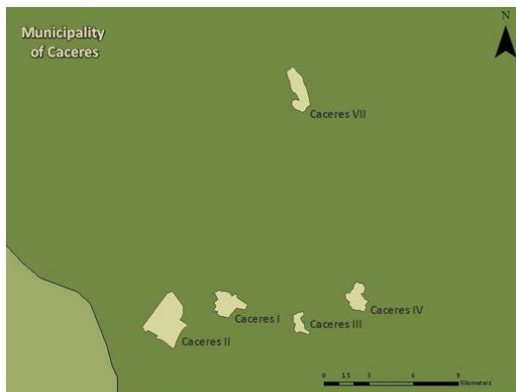

Map 3: Caceres project parcel location

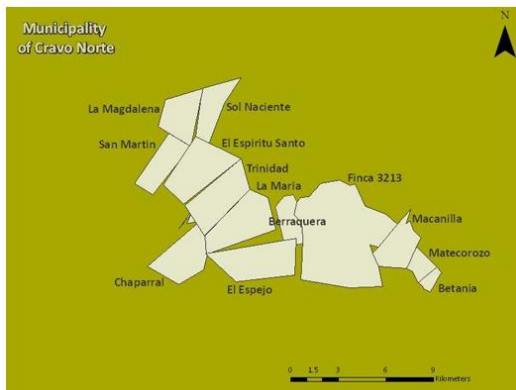

Map 4: Cravo Norte project parcel location

99. Manual delineation area: 10877.90ha

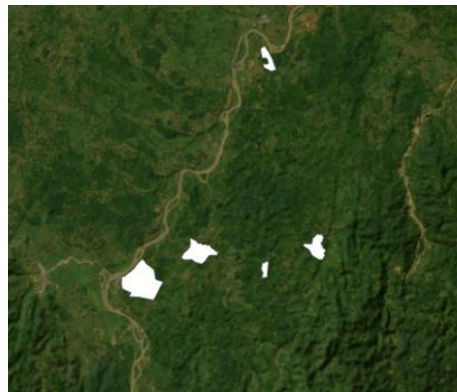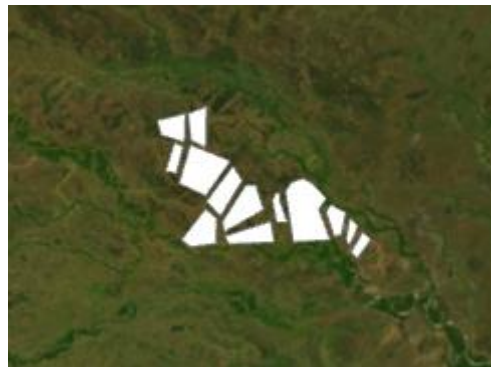

100. PDD claimed area: 353.9ha

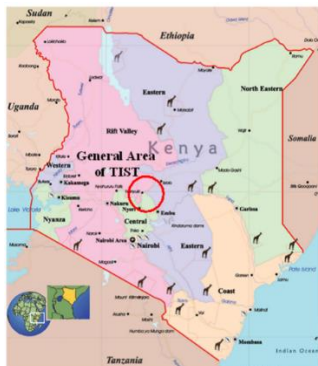

100. Delineation area: 354.42ha

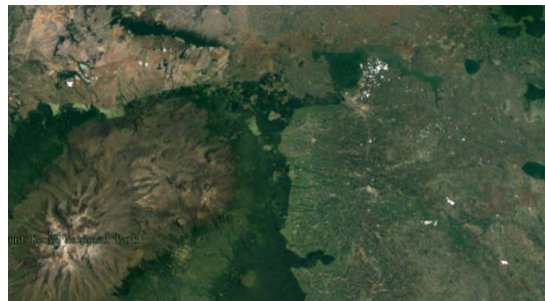

101. PDD claimed area: 398.1ha

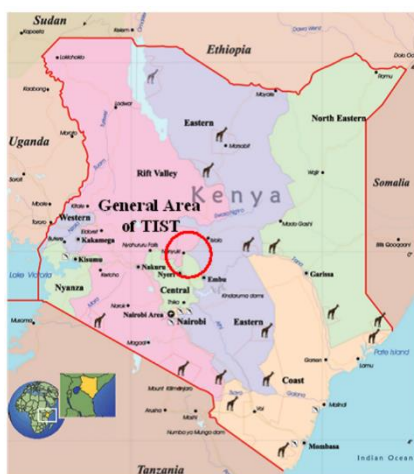

101. Delineation area: 395.85ha

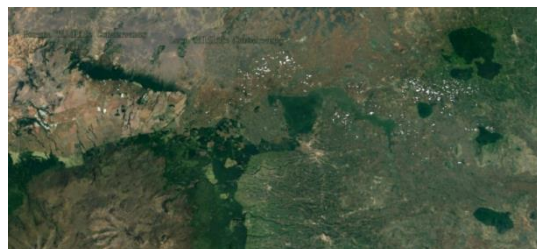

102. PDD claimed area: 412.5ha

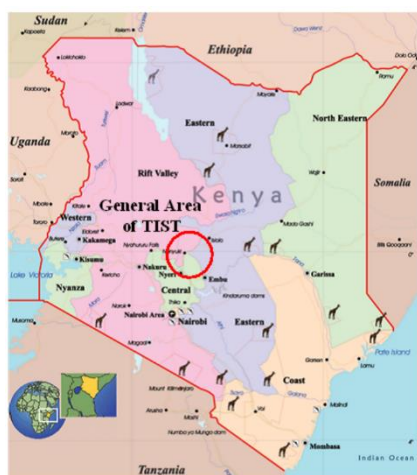

102. Delineation area: 414.65ha

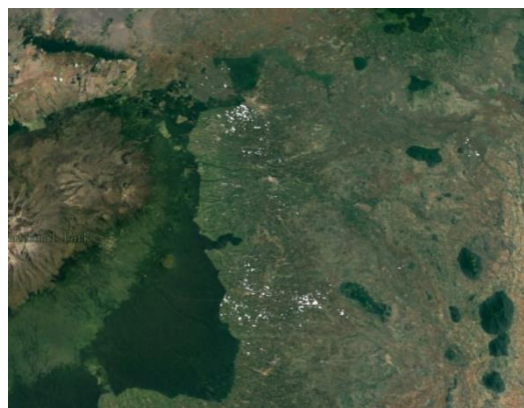

103. PDD claimed area: 391.6ha

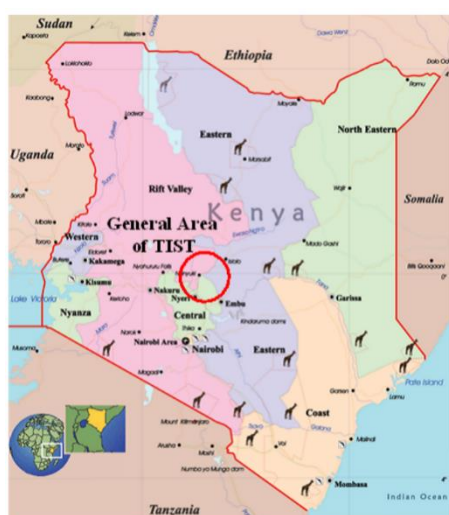

103. Delineation area: 394.40ha

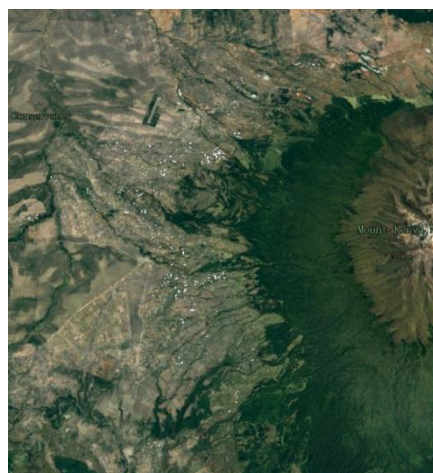

104. PDD claimed area: 2556.1ha

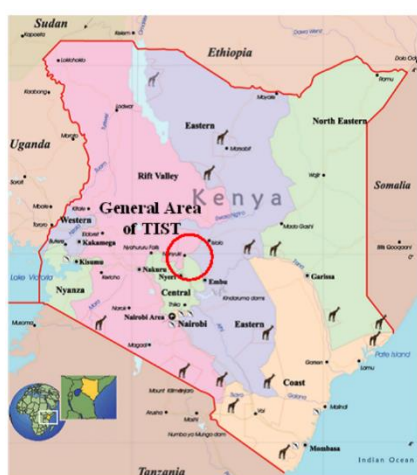

104. Delineation area: 2447.78ha

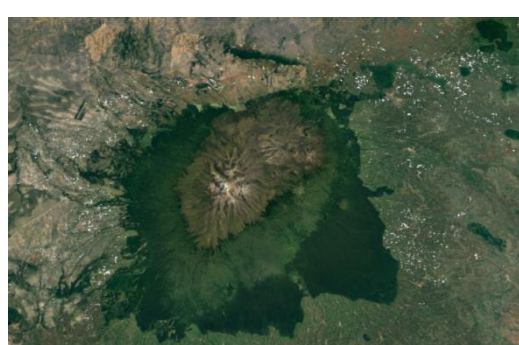

|                                                                                                                                                                                                                                                                                                          |                                                                                                                                   |
|----------------------------------------------------------------------------------------------------------------------------------------------------------------------------------------------------------------------------------------------------------------------------------------------------------|-----------------------------------------------------------------------------------------------------------------------------------|
| <p>105. PDD claimed area: 589ha</p> 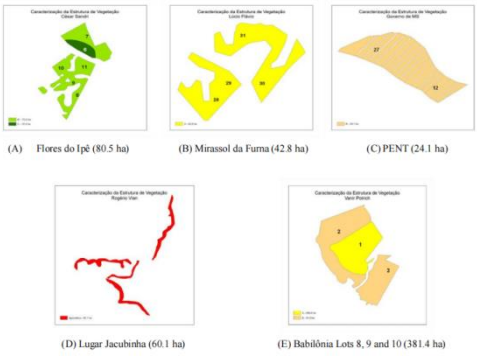 <p>(A) Flores do Ipê (80.5 ha)      (B) Mirassol da Fuma (42.8 ha)      (C) PENT (24.1 ha)</p> <p>(D) Lugar Jacobinha (60.1 ha)      (E) Babilônia Lots 8, 9 and 10 (381.4 ha)</p> | <p>105. Manual delineation area: 589.25ha</p>  |
| <p>106. PDD claimed area: 2061.6ha</p>                                                                                                                                                                                                                                                                   | <p>106. Delineation area: 2092.74ha</p>                                                                                           |

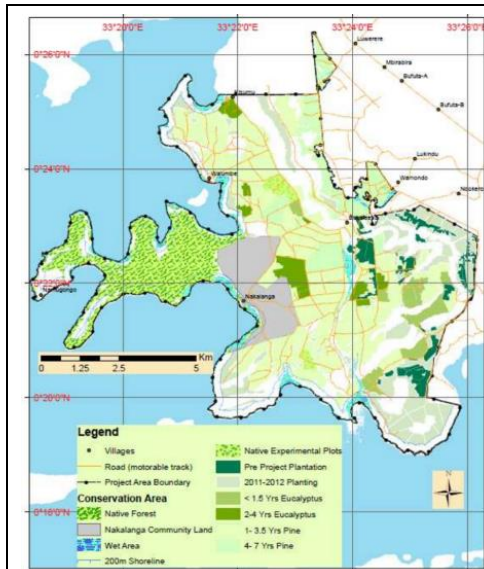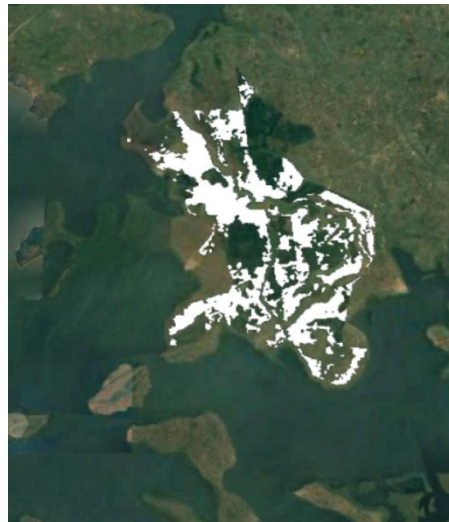

107. PDD claimed area: 777.1ha

107. Delineation area: 772.90ha

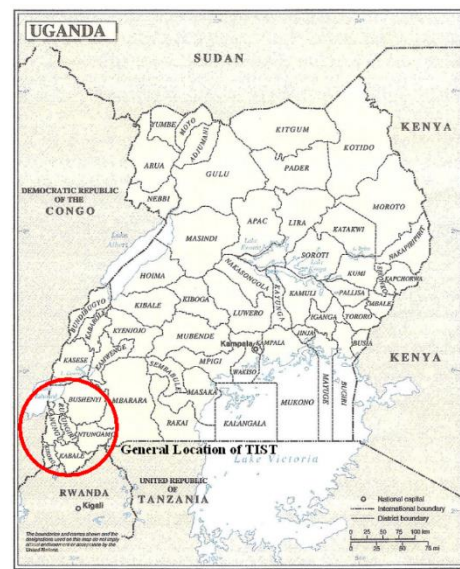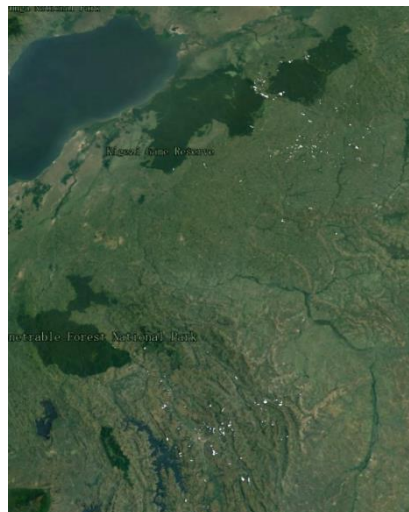

108. PDD claimed area: 164.9ha

108. Delineation area: 151.45ha

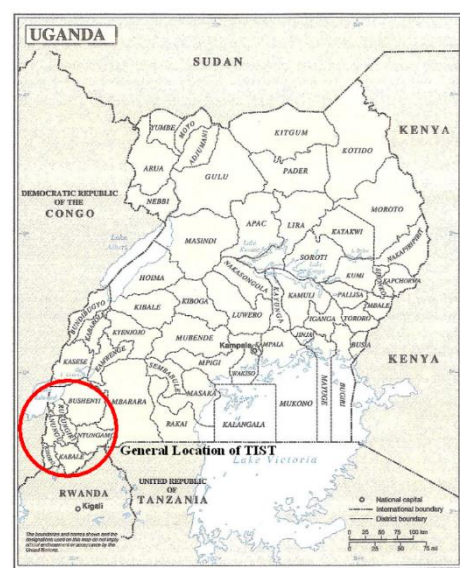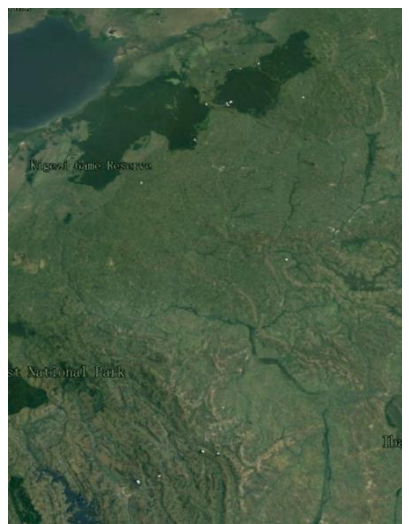

109. PDD claimed area: 102.2ha

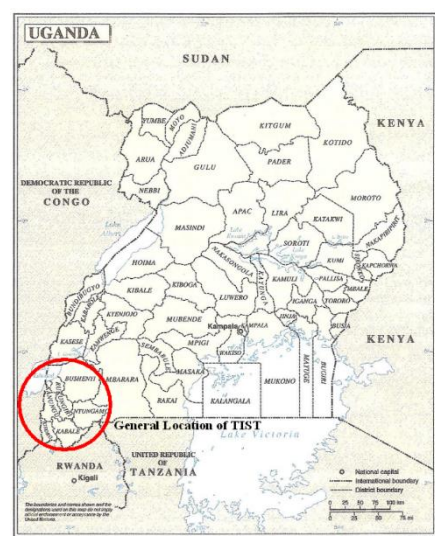

109. Delineation area: 102.01ha

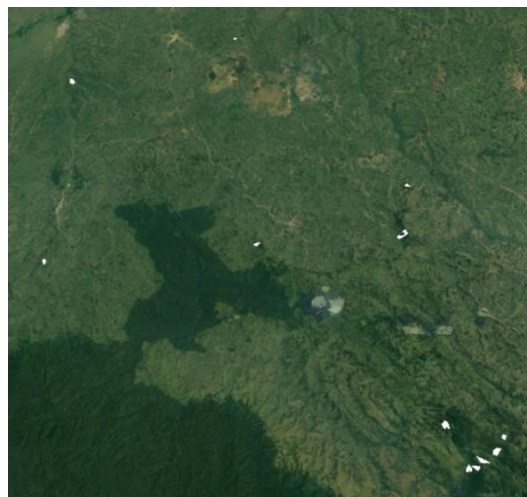

110. PDD claimed area: 443.3ha

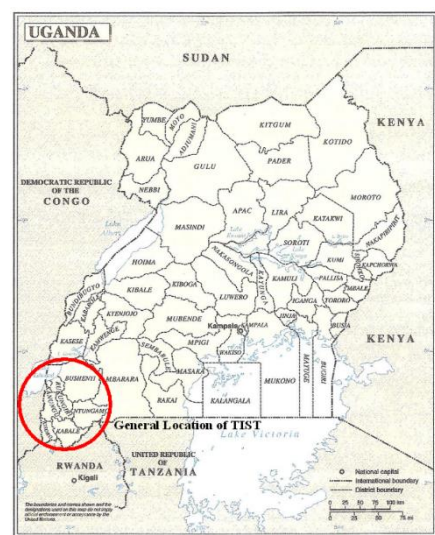

110. Delineation area: 452.56ha

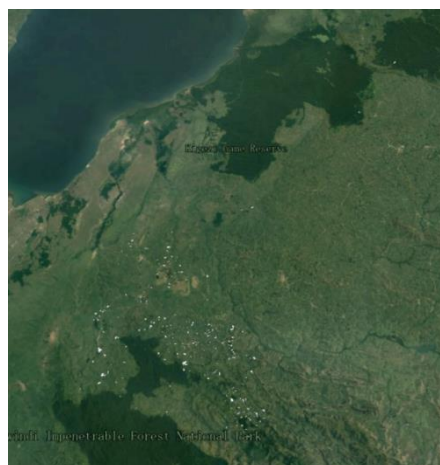

111. PDD claimed area: 21298ha

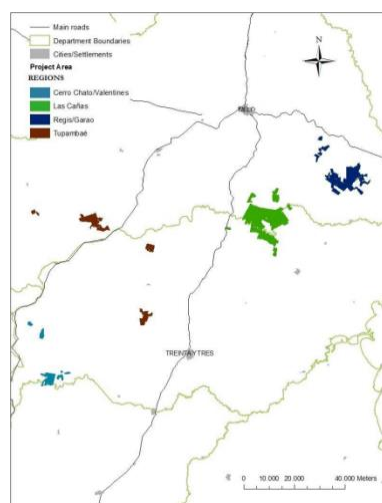

111. Delineation area: 21675.40ha

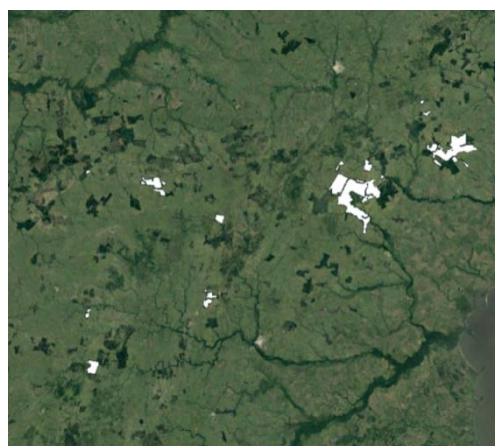

|                                                                                                                           |                                                                                                                             |
|---------------------------------------------------------------------------------------------------------------------------|-----------------------------------------------------------------------------------------------------------------------------|
| <p>112. PDD claimed area: 16928ha</p> 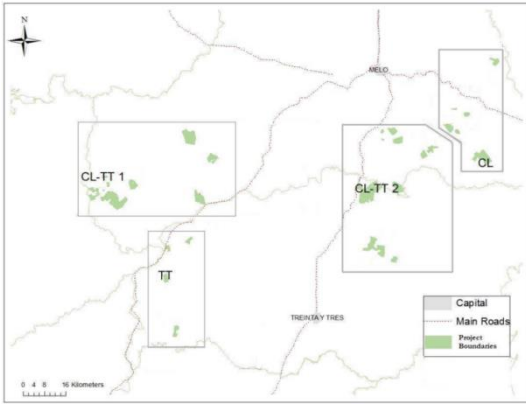   | <p>112. Delineation area: 17011.63ha</p>  |
| <p>113. PDD claimed area: 722.6ha</p>   | <p>113. Delineation area: 721.35ha</p>   |
| <p>114. PDD claimed area: 671.8ha</p>  | <p>114. Delineation area: 671.53ha</p>  |

|                                                                                                                             |                                                                                                                               |
|-----------------------------------------------------------------------------------------------------------------------------|-------------------------------------------------------------------------------------------------------------------------------|
| <p>115. PDD claimed area: 283.1ha</p>      | <p>115. Delineation area: 283.78ha</p>      |
| <p>116. PDD claimed area: 2724ha</p>      | <p>116. Delineation area: 2724.45ha</p>    |
| <p>117. PDD claimed area: 10415.1ha</p>  | <p>117. Delineation area: 10489.19ha</p>  |
| <p>118. PDD claimed area: 6002ha</p>     | <p>118. Delineation area: 6001.16ha</p>   |

119. PDD claimed area: 159.2ha

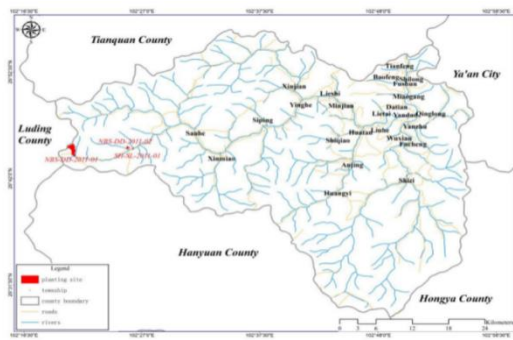

119. Manual delineation area: 160.20ha

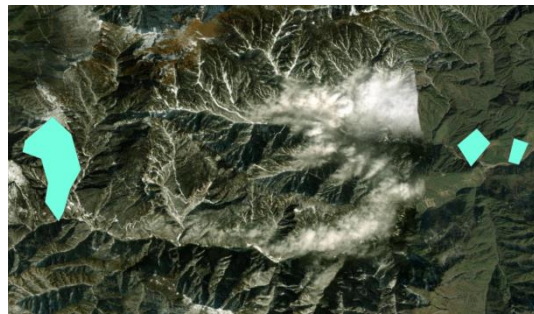

120. PDD claimed area: 1367.47ha

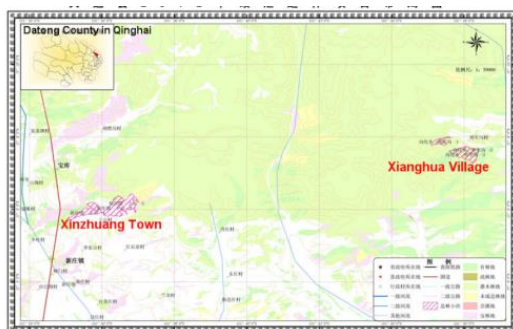

120. Manual delineation area: 1400.80ha

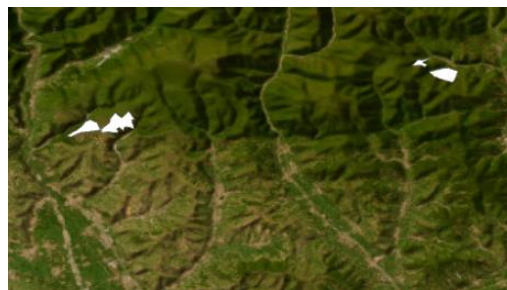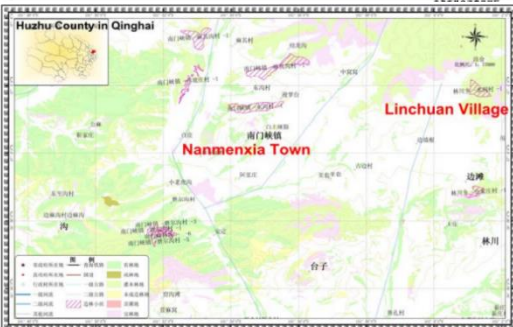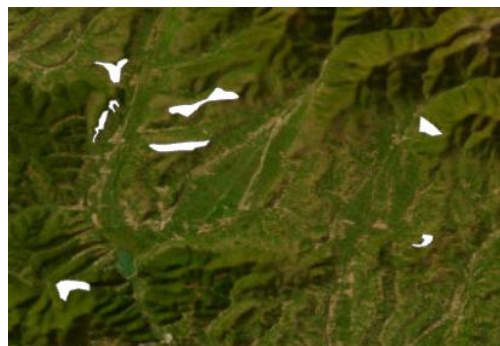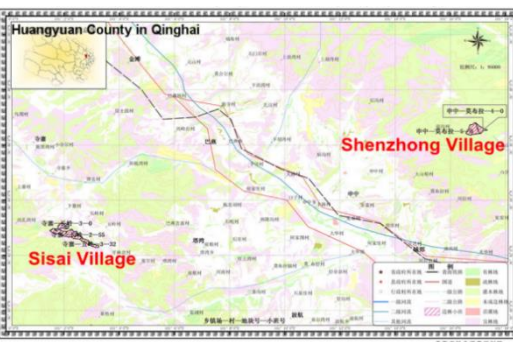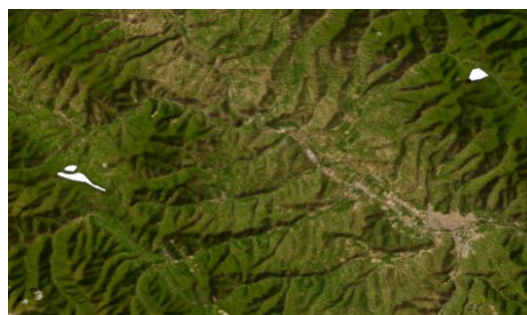

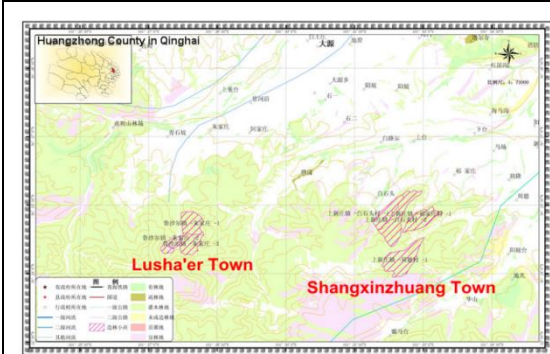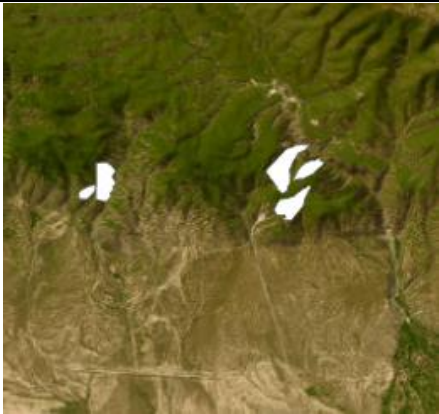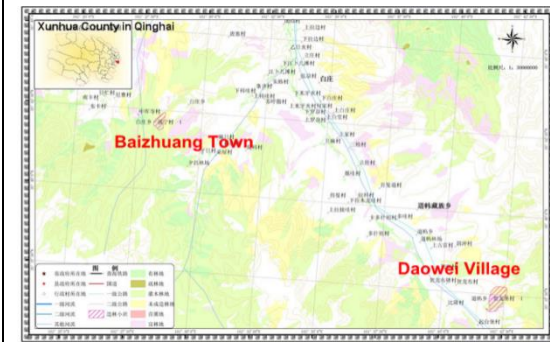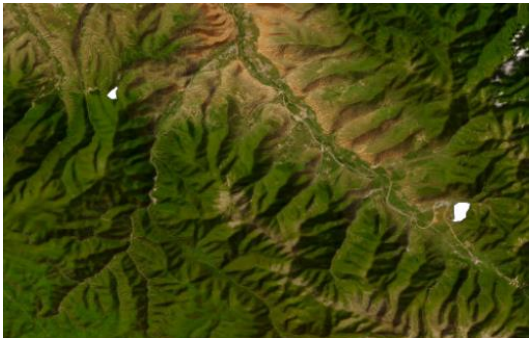

121. PDD claimed area: 4623.98ha

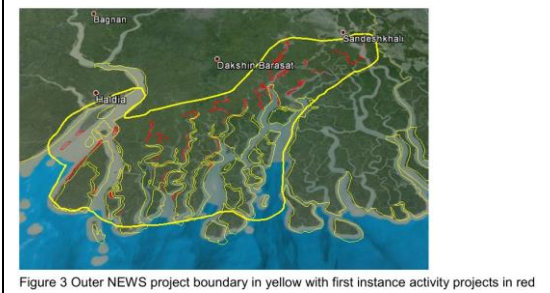

121. Delineation area: 4653.71ha

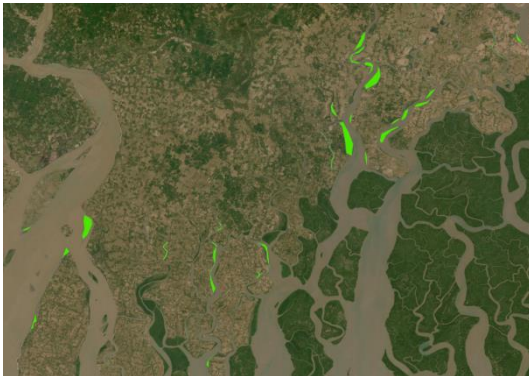

122. PDD claimed area: 461.01ha

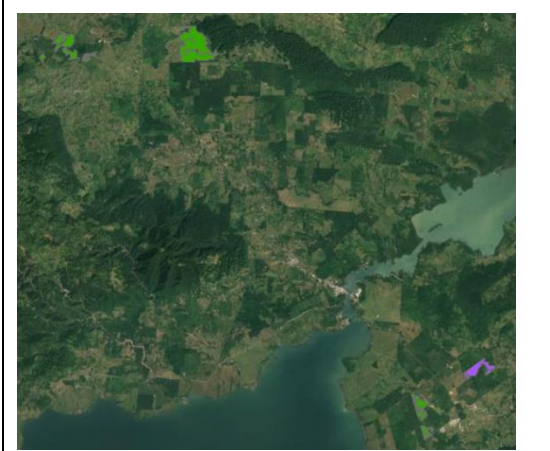

122. Delineation area: 470.03ha

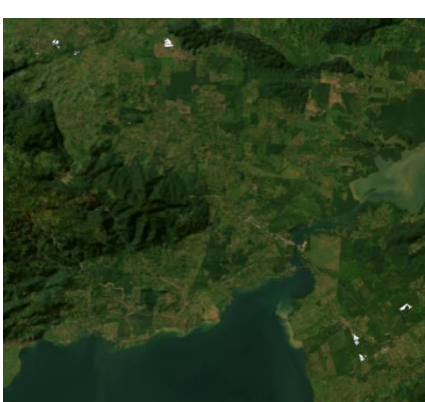

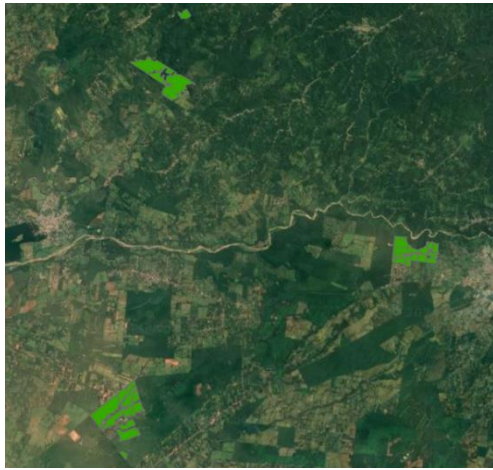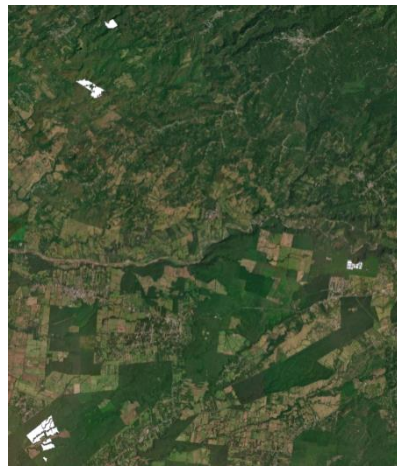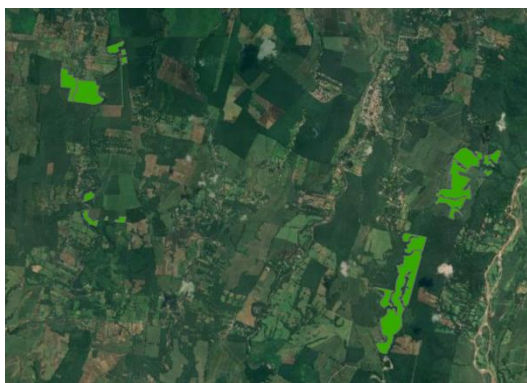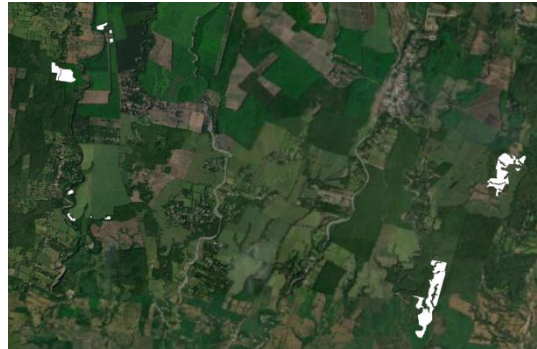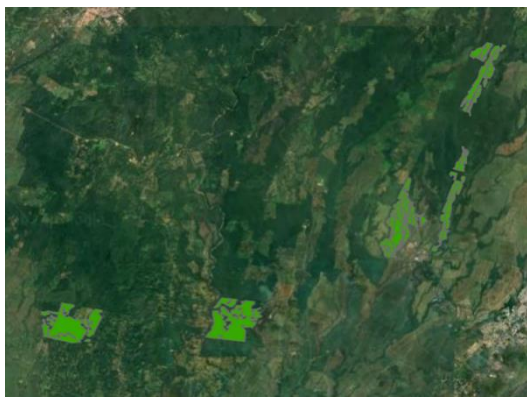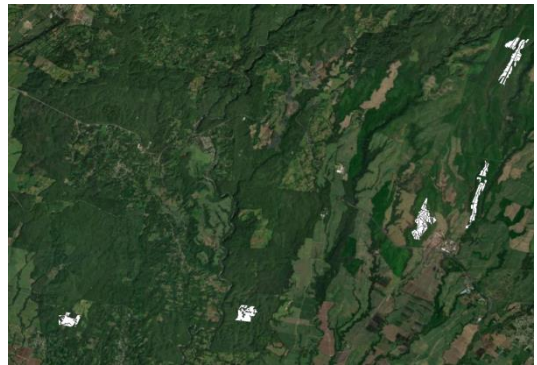

123. PDD claimed area: 1757.59ha

123. Delineation area: 1749.86ha

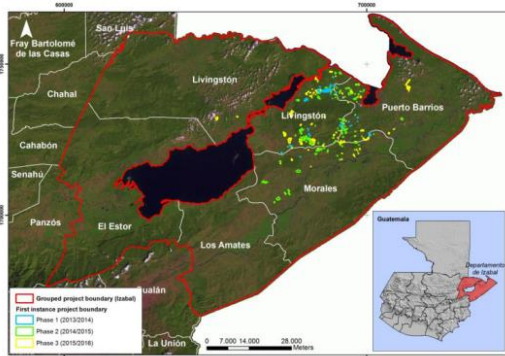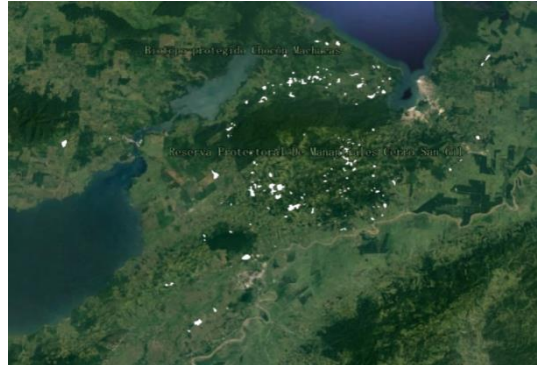

124. PDD claimed area: 969.2ha

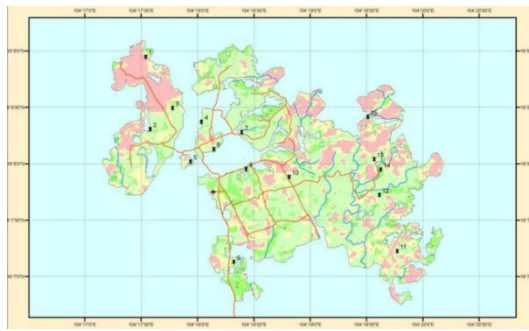

124. Delineation area: 1058.60ha

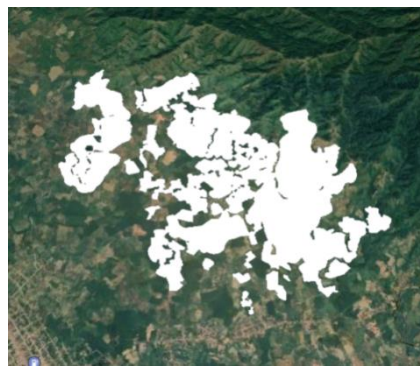

125. PDD claimed area: 4011.96ha

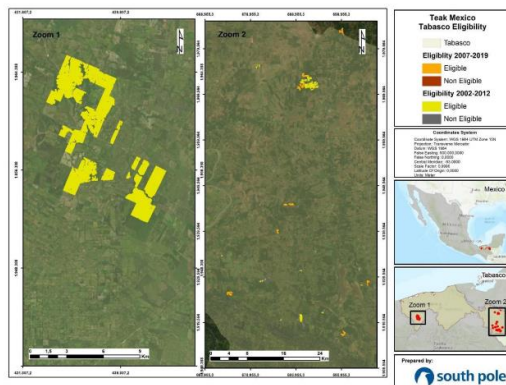

Figure 2: Project area first and second phase Tabasco

125. Delineation area: 3953.00ha

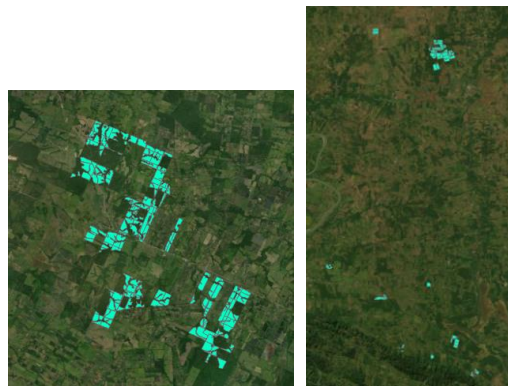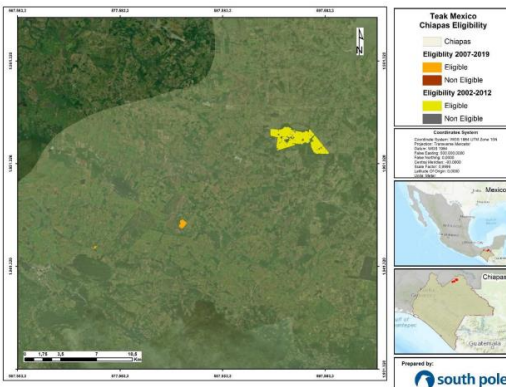

Figure 3: Project area first and second phase Chiapas

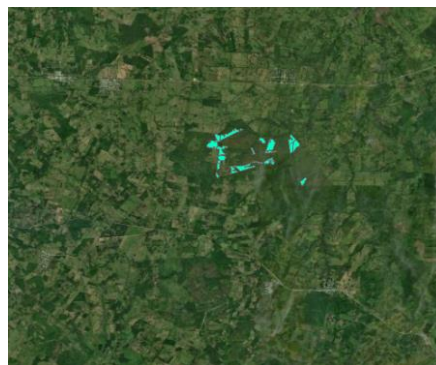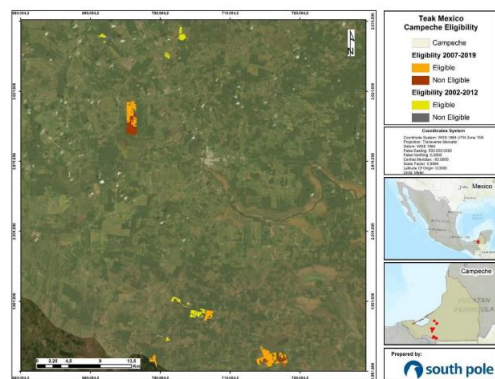

Figure 4: Project area first and second phase Campeche

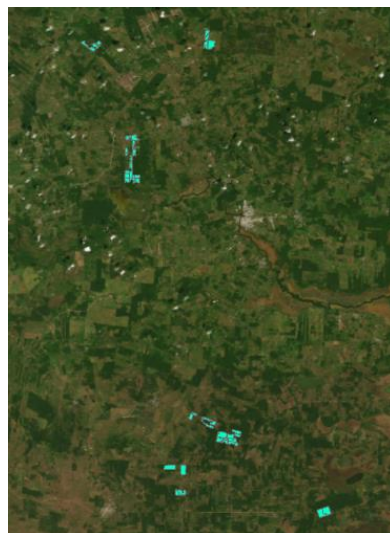

126. PDD claimed area: 13862.4ha

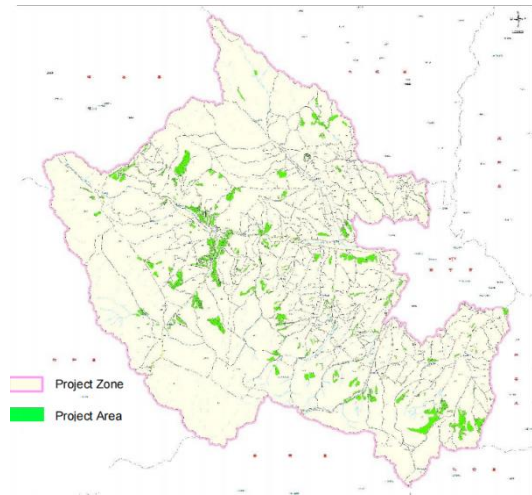

126. Delineation area: 13779.15ha

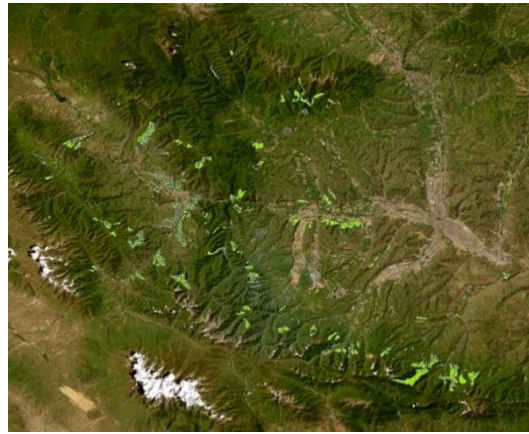

127. PDD claimed area: 30057ha

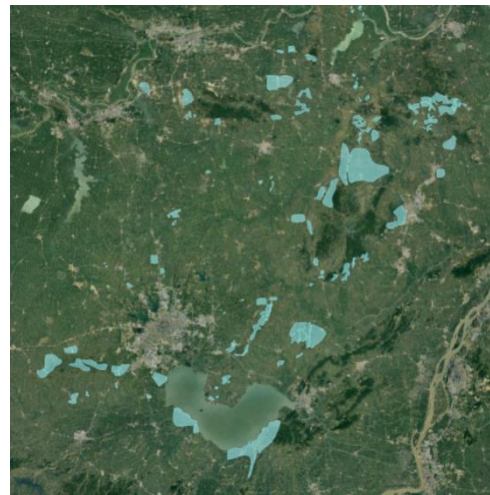

127. Delineation area: 30063.01ha

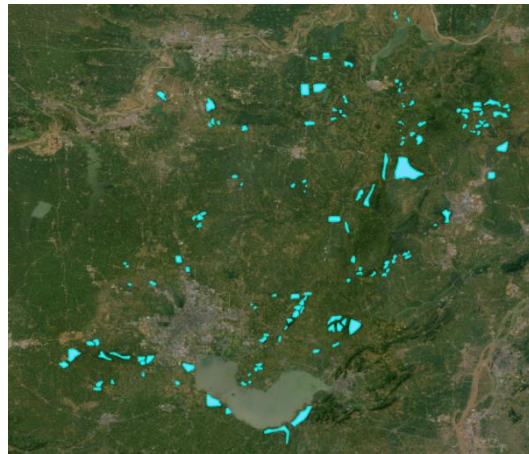

128. PDD claimed area: 26551ha

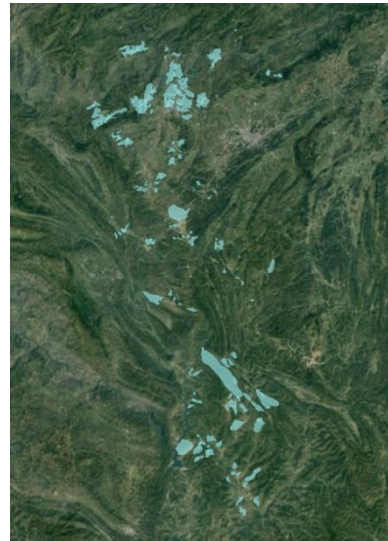

128. Delineation area: 27102.07ha

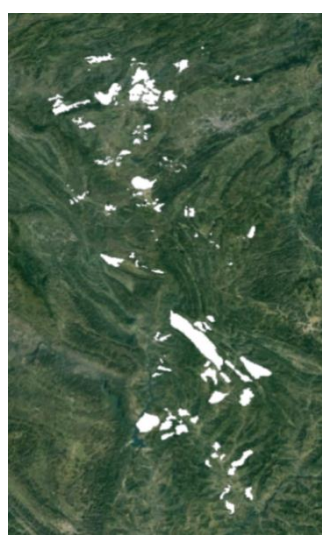

129. PDD claimed area: 25449ha

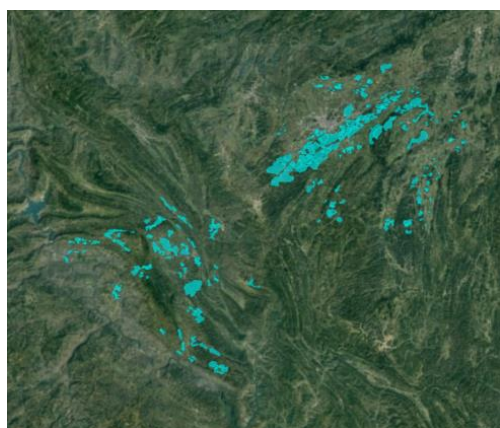

129. Delineation area: 25507.48ha

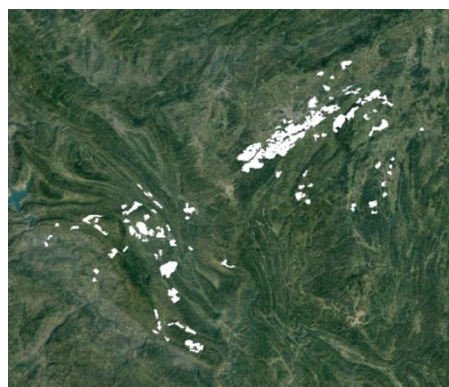

130. PDD claimed area: 22119.9ha

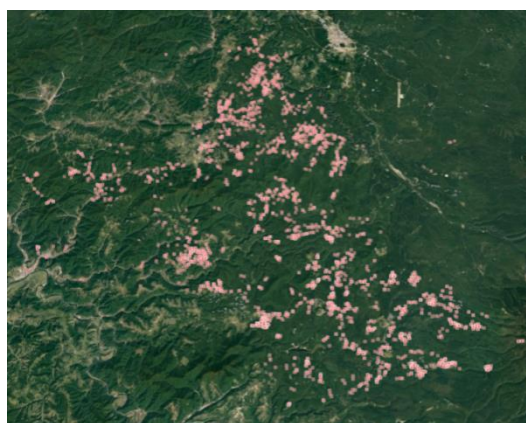

130. Delineation area: 22346.06ha

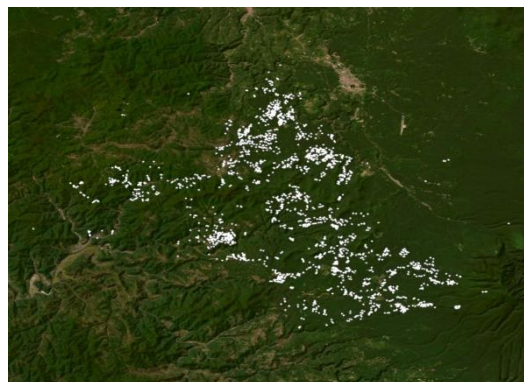

131. PDD claimed area: 41318ha

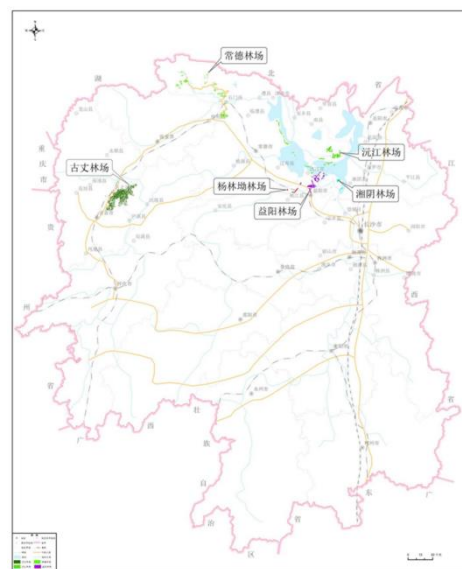

131. Delineation area: 41676.53ha

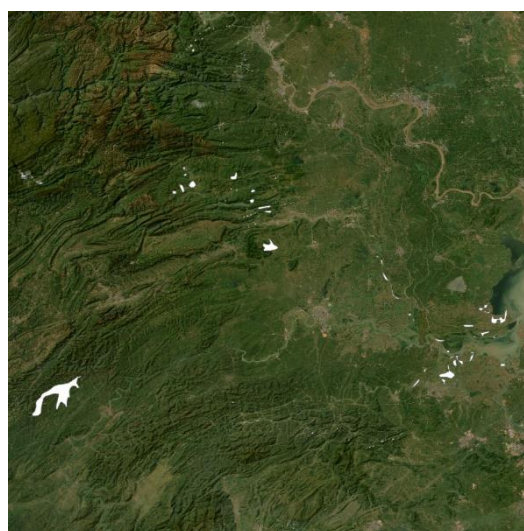

132. PDD claimed area: 46000ha

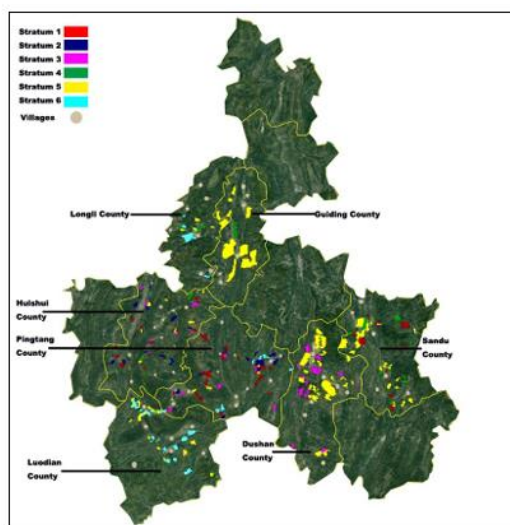

132. Delineation area: 46060.86ha

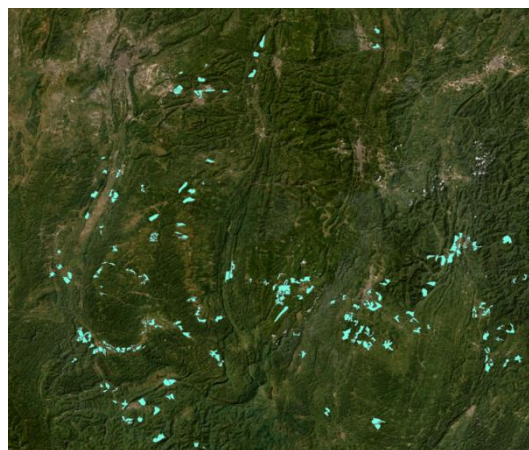

133. PDD claimed area: 23720ha

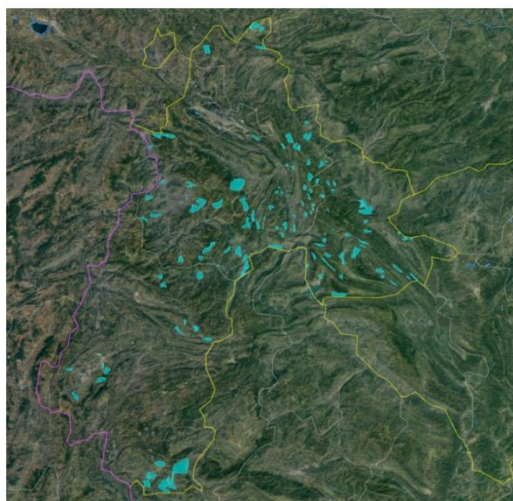

133. Delineation area: 22632.59ha

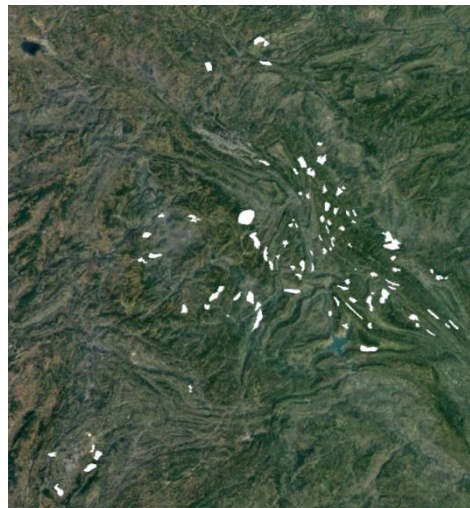

134. PDD claimed area: 32722.7ha

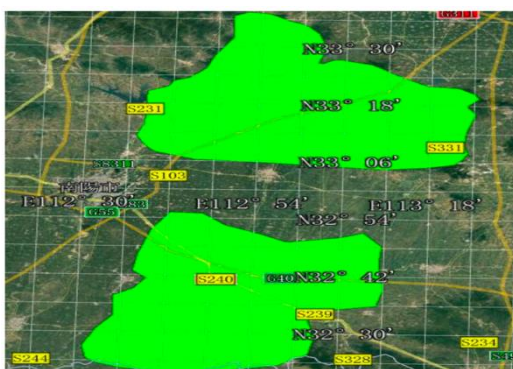

|      |                          |            |
|------|--------------------------|------------|
| 134. | Manual delineation area: | 32032.64ha |
|------|--------------------------|------------|

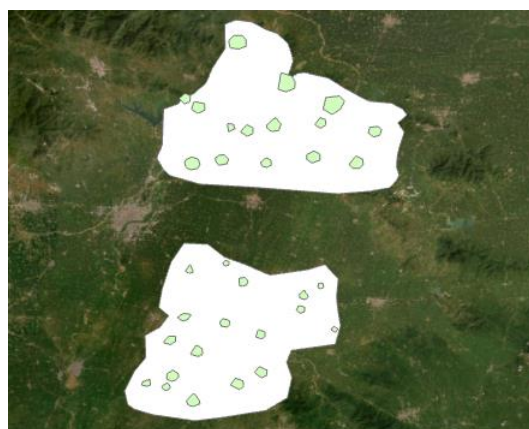

|                                                                                                                           |                                                                                                                             |
|---------------------------------------------------------------------------------------------------------------------------|-----------------------------------------------------------------------------------------------------------------------------|
| <p>135. PDD claimed area: 39000ha</p> 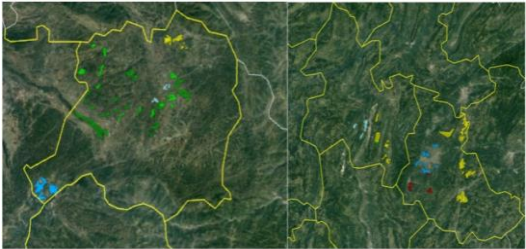   | <p>135. Delineation area: 38464.06ha</p>  |
| <p>136. PDD claimed area: 2293ha</p>    | <p>136. Delineation area: 2158.87ha</p>  |
| <p>137. PDD claimed area: 380.4ha</p>  | <p>137. Delineation area: 404.36ha</p>  |

138. PDD claimed area: 8000ha

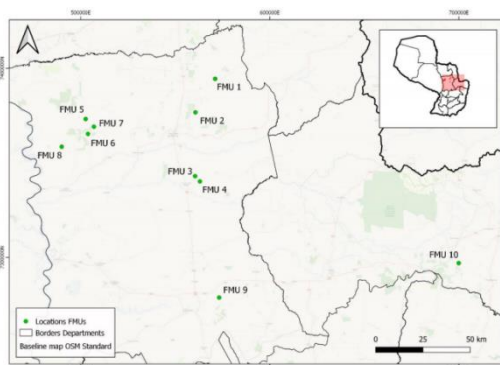

138. Delineation area: 7982.35ha

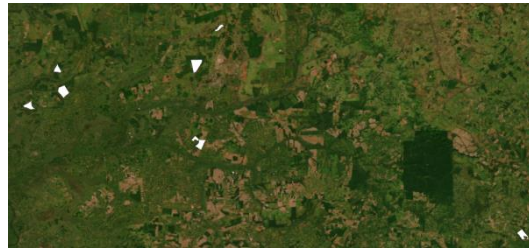

139. PDD claimed area: 2866ha

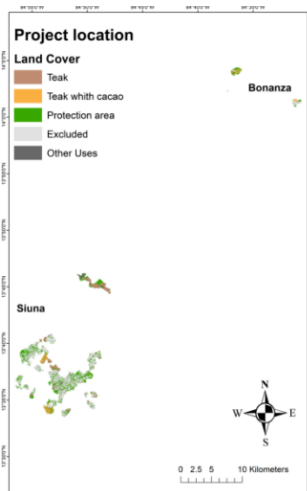

139. Delineation area: 2919.01ha

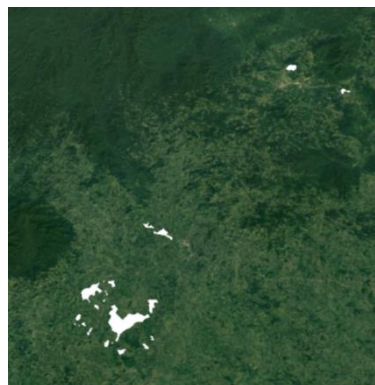

140. PDD claimed area: 23397.8ha

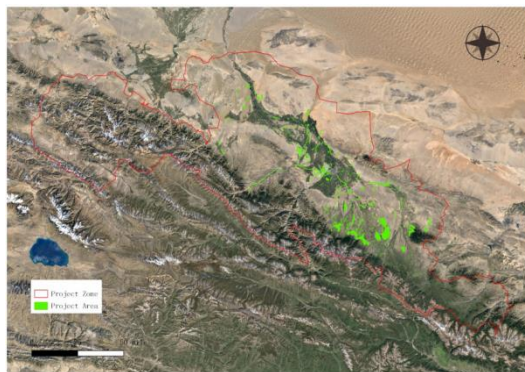

140. Delineation area: 24458.09ha

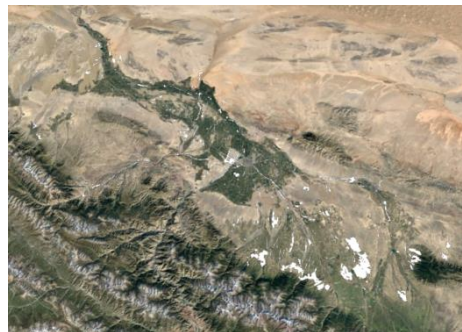

|                                                                                                                           |                                                                                                                               |
|---------------------------------------------------------------------------------------------------------------------------|-------------------------------------------------------------------------------------------------------------------------------|
| <p>141. PDD claimed area: 22564.6ha</p> 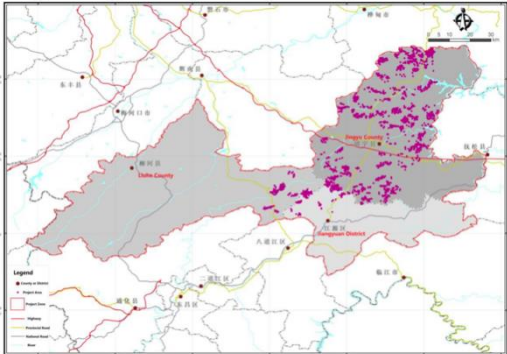 | <p>141. Delineation area: 22543.59ha</p>    |
| <p>142. PDD claimed area: 30169ha</p>   | <p>142. Delineation area: 29227.85ha</p>   |
| <p>143. PDD claimed area: 43600ha</p>  | <p>143. Delineation area: 43088.48ha</p>  |
| <p>144. PDD claimed area: 33000ha</p>                                                                                     | <p>144. Delineation area: 34005.04ha</p>                                                                                      |

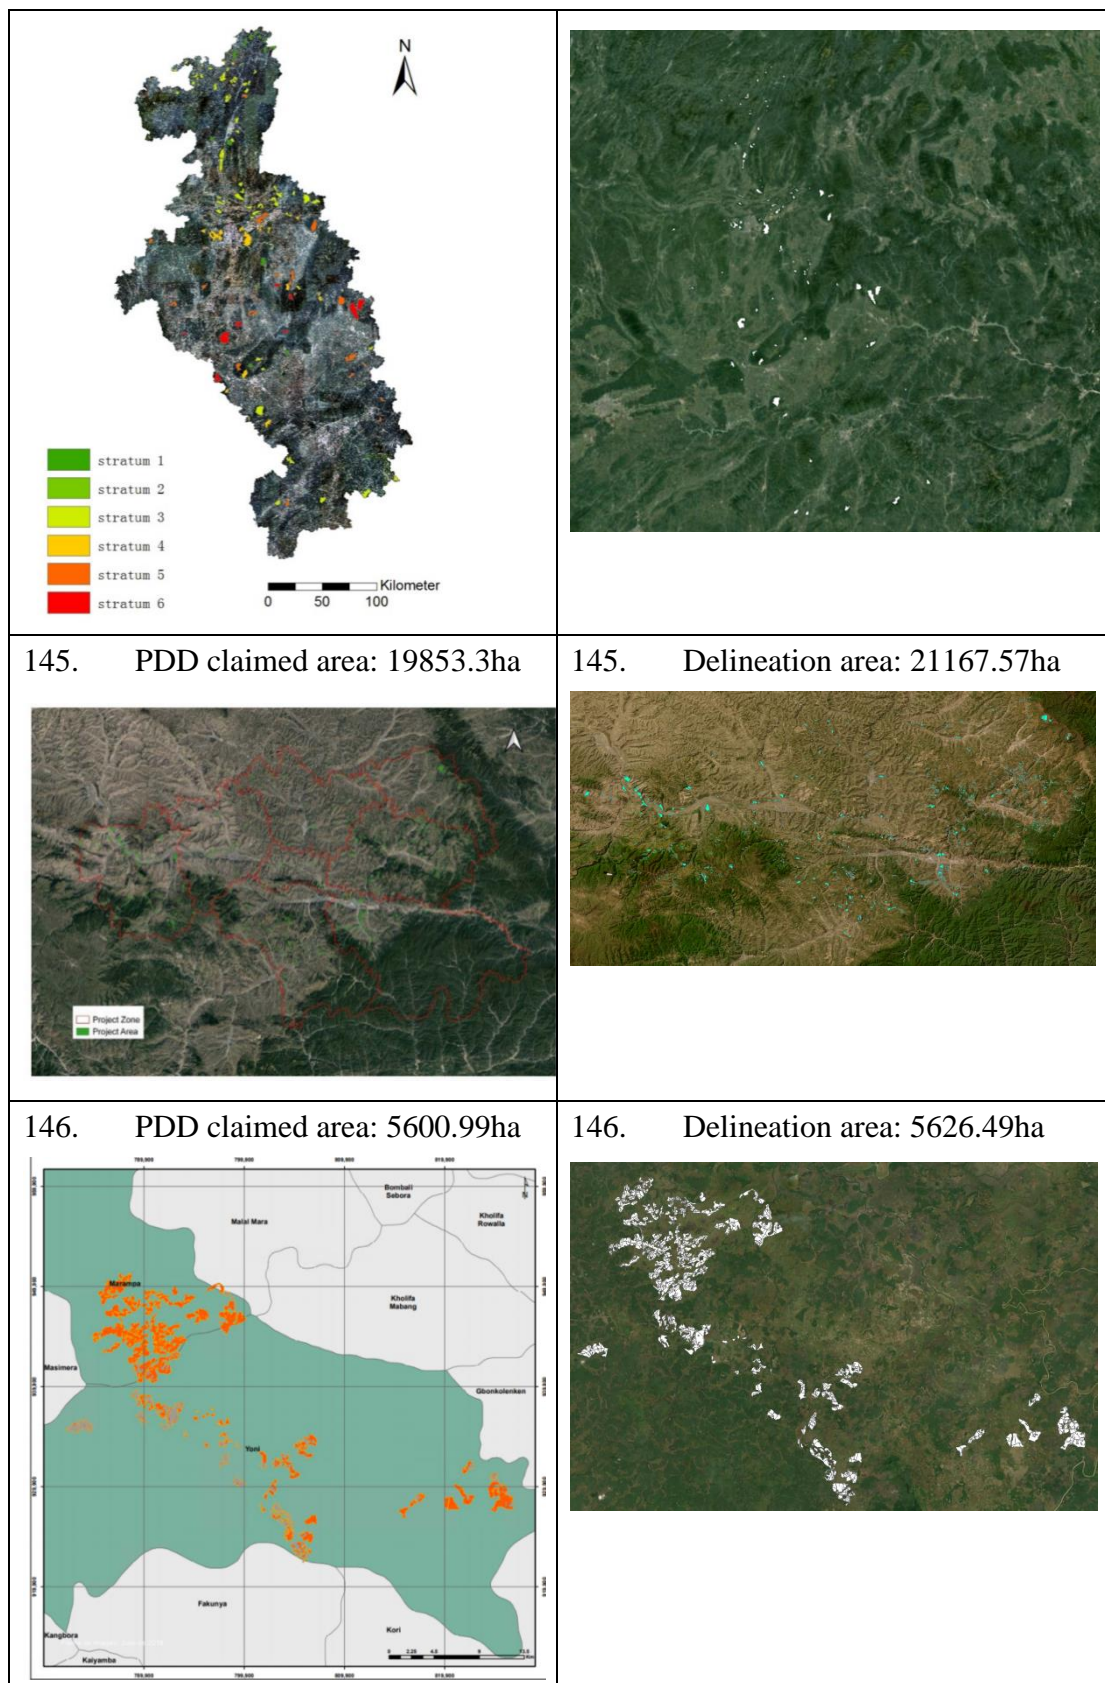

|                                                                                                                             |                                                                                                                               |
|-----------------------------------------------------------------------------------------------------------------------------|-------------------------------------------------------------------------------------------------------------------------------|
| <p>147. PDD claimed area: 5472.54ha</p> 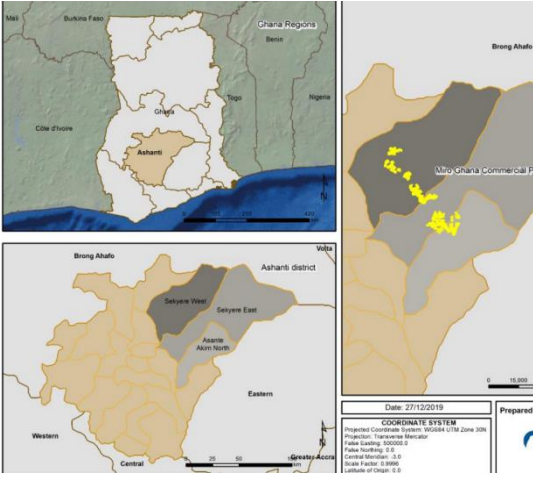   | <p>147. Delineation area: 5552.24ha</p>     |
| <p>148. PDD claimed area: 23363.2ha</p>   | <p>148. Delineation area: 23699.36ha</p>   |
| <p>149. PDD claimed area: 25001.9ha</p>  | <p>149. Delineation area: 25337.26ha</p>  |

|                                                                                                                             |                                                                                                                               |
|-----------------------------------------------------------------------------------------------------------------------------|-------------------------------------------------------------------------------------------------------------------------------|
| <p>150. PDD claimed area: 1889ha</p> 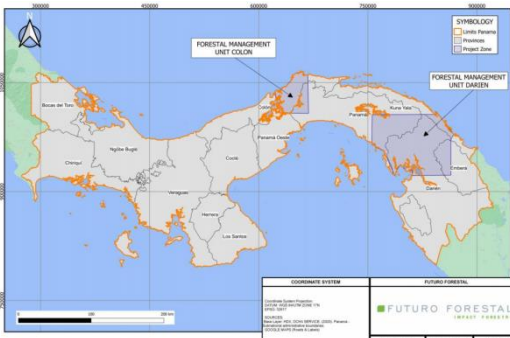      | <p>150. Delineation area: 1870.99ha</p>     |
| <p>151. PDD claimed area: 3827.91ha</p>   | <p>151. Delineation area: 3803.41 ha</p>   |
| <p>152. PDD claimed area: 38859ha</p>    | <p>152. Delineation area: 39036.47ha</p>  |
| <p>153. PDD claimed area: 10033.4ha</p>  | <p>153. Delineation area: 10588.19ha</p>  |

154. PDD claimed area: 3331ha

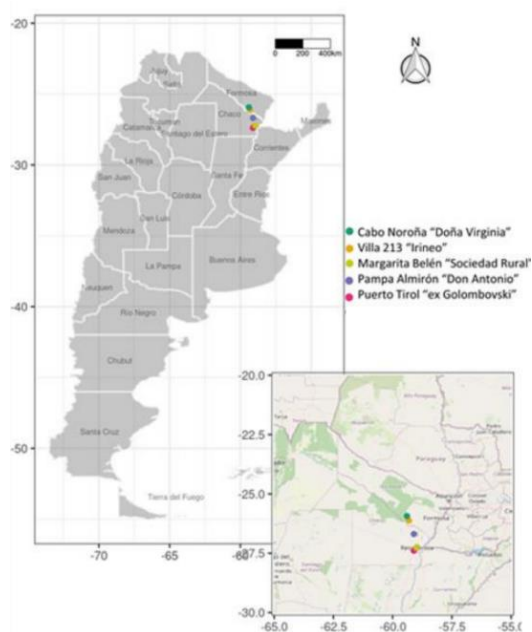

154. Delineation area: 3337.06ha

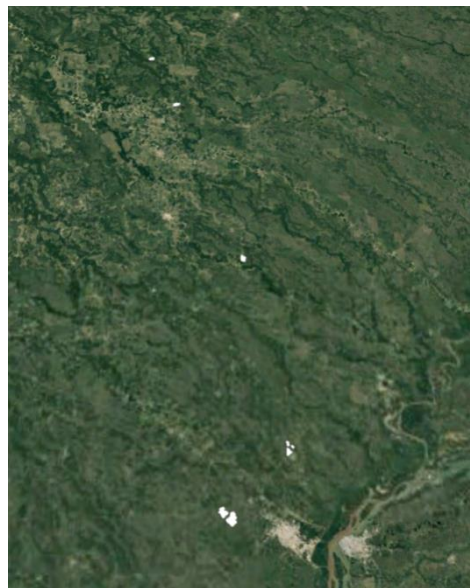

309  
310  
311

## References

1. Winrock International. *The American Carbon Registry Standard*. <http://www.americancarbonregistry.org> (2010).
2. Climate Action Reserve. Register a Compliance Offset Project. <https://www.climateactionreserve.org/how/california-compliance-projects> (2018).
3. Guizar-Coutiño, A., Jones, J. P. G., Balmford, A., Carmenta, R. & Coomes, D. A. A global evaluation of the effectiveness of voluntary REDD+ projects at reducing deforestation and degradation in the moist tropics. *Conserv. Biol.* **36**, 1–13 (2022).
4. West, T. A. P., Börner, J., Sills, E. O. & Kontoleon, A. Overstated carbon emission reductions from voluntary REDD+ projects in the Brazilian Amazon. *Proc. Natl. Acad. Sci. U. S. A.* **117**, 24188–24194 (2020).
5. West, T. A. P. *et al.* Action needed to make carbon offsets from forest conservation work for climate change mitigation. *Science* **381**, 873–877 (2023).
6. Jones, J. P. G. & Lewis, S. L. Forest carbon offsets are failing: Analysis reveals emission reductions from forest conservation have been overestimated. *Science* **381**, 830–831 (2023).
7. Malan, M. *et al.* Evaluating the impacts of a large-scale voluntary REDD+ project in Sierra Leone. *Nat. Sustain.* **7**, (2024).
8. Climate Action Reserve. Compliance Offset Program Documents. <https://www.climateactionreserve.org/how/california-compliance-projects/compliance-offset-program-documents/> (2020).
9. American Carbon Registry. Offset Program Forms. <https://ww2.arb.ca.gov/our-work/programs/compliance-offset-program/offset-program-forms> (2016).
10. Dubayah, R. *et al.* The Global Ecosystem Dynamics Investigation: High-resolution laser ranging of the Earth's forests and topography. *Sci. Remote Sens.* **1**, 100002 (2020).
11. Dubayah, R. *et al.* GEDI launches a new era of biomass inference from space.

- 340 *Environ. Res. Lett.* **17**, 95001 (2022).
- 341 12. Magruder, L. A. *et al.* Monitoring Earth's climate variables with satellite laser  
342 altimetry. *Nat. Rev. Earth Environ.* 1–17 (2024).
- 343 13. Lu, D., Chen, Q., Wang, G., Liu, L. & Li, G. A survey of remote sensing-based  
344 aboveground biomass estimation methods in forest ecosystems. *Int. J. Digit.*  
345 *Earth* **0**, 1–43 (2016).
- 346 14. Shendryk, Y. Fusing GEDI with earth observation data for large area  
347 aboveground biomass mapping. *Int. J. Appl. Earth Obs. Geoinf.* **115**, 103108  
348 (2022).
- 349 15. Xiao, J. *et al.* Remote sensing of the terrestrial carbon cycle: A review of  
350 advances over 50 years. *Remote Sens. Environ.* **233**, 111383 (2019).
- 351 16. Mugabowindekwe, M. *et al.* Nation-wide mapping of tree-level aboveground  
352 carbon stocks in Rwanda. *Nat. Clim. Chang.* **13**, 91–97 (2023).
- 353 17. Duncanson, L. *et al.* Biomass estimation from simulated GEDI, ICESat-2 and  
354 NISAR across environmental gradients in Sonoma County, California. *Remote*  
355 *Sens. Environ.* **242**, (2020).
- 356 18. Silva, C. A. *et al.* Fusing simulated GEDI, ICESat-2 and NISAR data for regional  
357 aboveground biomass mapping. *Remote Sens. Environ.* **253**, (2021).
- 358 19. May, P. B., Dubayah, R. O., Bruening, J. M. & Gaines III, G. C. Connecting  
359 space-borne lidar with NFI networks: A method for improved estimation of  
360 forest structure and biomass. *Int. J. Appl. Earth Obs. Geoinf.* **129**, 103797 (2024).
- 361 20. Qi, W., Saarela, S., Armston, J., Ståhl, G. & Dubayah, R. Forest biomass  
362 estimation over three distinct forest types using TanDEM-X InSAR data and  
363 simulated GEDI lidar data. *Remote Sens. Environ.* **232**, 111283 (2019).
- 364 21. Duncanson, L. *et al.* Aboveground biomass density models for NASA's Global  
365 Ecosystem Dynamics Investigation (GEDI) lidar mission. *Remote Sens. Environ.*  
366 **270**, (2022).
- 367 22. Pascual, A. *et al.* Assessing the performance of NASA's GEDI L4A footprint  
368 aboveground biomass density models using National Forest Inventory and  
369 airborne laser scanning data in Mediterranean forest ecosystems. *For. Ecol.*

- 370 *Manage.* **538**, 120975 (2023).
- 371 23. Patterson, P. L. *et al.* Statistical properties of hybrid estimators proposed for  
372 GEDI—NASA’s global ecosystem dynamics investigation. *Environ. Res. Lett.*  
373 **14**, 65007 (2019).
- 374 24. Lang, N., Jetz, W., Schindler, K. & Wegner, J. D. A high-resolution canopy  
375 height model of the Earth. *Nat. Ecol. Evol.* **7**, 1778–1789 (2023).
- 376 25. Zhu, X. *et al.* Consistency analysis of forest height retrievals between GEDI and  
377 ICESat-2. *Remote Sens. Environ.* **281**, 113244 (2022).
- 378 26. Duncanson, L. *et al.* The effectiveness of global protected areas for climate  
379 change mitigation. *Nat. Commun.* **14**, 2908 (2023).
- 380 27. Cushman, K. C. *et al.* Impact of leaf phenology on estimates of aboveground  
381 biomass density in a deciduous broadleaf forest from simulated GEDI lidar.  
382 *Environ. Res. Lett.* **18**, 65009 (2023).
- 383 28. Torres, R. *et al.* GMES Sentinel-1 mission. *Remote Sens. Environ.* **120**, 9–24  
384 (2012).
- 385 29. Drusch, M. *et al.* Sentinel-2: ESA’s optical high-resolution mission for GMES  
386 operational services. *Remote Sens. Environ.* **120**, 25–36 (2012).
- 387 30. Farr, T. G. *et al.* The shuttle radar topography mission. *Rev. Geophys.* **45**, (2007).
- 388 31. Fick, S. E. & Hijmans, R. J. WorldClim 2: new 1-km spatial resolution climate  
389 surfaces for global land areas. *Int. J. Climatol.* **37**, 4302–4315 (2017).
- 390 32. Liaw, A. & Wiener, M. Classification and Regression by randomForest. *R News*  
391 **2**, 18–22 (2002).
- 392 33. Breiman, L. Random Forests. *Mach. Learn.* **45**, 5–32 (2001).
- 393 34. Qin, S. *et al.* Forest emissions reduction assessment using airborne LiDAR for  
394 biomass estimation. *Resour. Conserv. Recycl.* **181**, 106224 (2022).
- 395 35. Golinkoff, J., Hanus, M. & Carah, J. The use of airborne laser scanning to  
396 develop a pixel-based stratification for a verified carbon offset project. *Carbon*  
397 *Balance Manag.* **6**, 1–17 (2011).
- 398 36. Coffield, S. R. *et al.* Using remote sensing to quantify the additional climate  
399 benefits of California forest carbon offset projects. *Glob. Chang. Biol.* **28**, 6789–

400 6806 (2022).

401 37. Saatchi, S.S. *et al.* AfriSAR: Aboveground Biomass for Lope, Mabounie,  
402 Mondah, and Rabi Sites, Gabon. *ORNL DAAC, Oak Ridge, Tennessee, USA*.  
403 <https://doi.org/10.3334/ORNLDAAC/1681> (2019).

404 38. Fekety, P.A., and A. T. Hudak. LiDAR Derived Forest Aboveground Biomass  
405 Maps, Northwestern USA, 2002-2016. *ORNL DAAC, Oak Ridge, Tennessee,*  
406 *USA*. <https://doi.org/10.3334/ORNLDAAC/1766> (2020).

407 39. Keller, M.M., P. Duffy, and W. Barnett. LiDAR and PALSAR-Derived Forest  
408 Aboveground Biomass, Paragominas, Para, Brazil, 2012. *ORNL DAAC, Oak*  
409 *Ridge, Tennessee, USA*. <https://doi.org/10.3334/ORNLDAAC/1648> (2019).

410 40. Dos-Santos, M.N., M.M. Keller, and D. C. Morton. LiDAR Surveys over  
411 Selected Forest Research Sites, Brazilian Amazon, 2008-2018. *ORNL DAAC,*  
412 *Oak Ridge, Tennessee, USA*. <https://doi.org/10.3334/ORNLDAAC/1644> (2019).

413 41. Ferraz, A. *et al.* Aboveground Biomass, Landcover, and Degradation,  
414 Kalimantan Forests, Indonesia, 2014. *ORNL DAAC, Oak Ridge, Tennessee, USA*.  
415 <https://doi.org/10.3334/ORNLDAAC/1645> (2019).

416 42. Mascaro, J., Detto, M., Asner, G. P. & Muller-Landau, H. C. Evaluating  
417 uncertainty in mapping forest carbon with airborne LiDAR. *Remote Sens.*  
418 *Environ.* **115**, 3770–3774 (2011).

419 43. Díaz-Francés, E. & Rubio, F. J. On the existence of a normal approximation to  
420 the distribution of the ratio of two independent normal random variables. *Stat.*  
421 *Pap.* **54**, 309–323 (2013).

422
